# Supplementary material for: Associations between obesity, smoking behaviors, reproductive traits and spontaneous abortion: a univariable and multivariable Mendelian randomization study
Source: Front Endocrinol (Lausanne). 2023 Jul 20;14:1193995. doi: 10.3389/fendo.2023.1193995 (PMC10400331; doi:10.3389/fendo.2023.1193995)
Supplement: Supplementary file 1 [file Table_1.xlsx]

## Sheet: Table S1
Table S1: Information on genetic instruments and outcome data sources
Genetic variants	Identified SNPs*	Year	Author	Consortium	Population	Sex	Sample size	Number of SNPs	PMID / ID
Obesity
Arm fat percentage (left)	184	2018	Ben Elsworth	Medical Research Council Integrative Epidemiology Unit	European	Males and Females	454,724 European-descent individuals	9851867	ukb-b-20188
Leg fat percentage (left)	220	2017	Neale	UK Biobank (Neale Lab)	European	Males and Females	331,278 European-descent individuals	10894596	http://www.nealelab.is/uk-biobank
Trunk fat percentage	348	2018	Ben Elsworth	Medical Research Council Integrative Epidemiology Unit	European	Males and Females	454,613 European-descent individuals	9851867	ukb-b-16407
Waist circumference	22	2015	Shungin D	Genetics of Anthropometric Traits	European	Females	127,469 European-descent individuals	2473036	25673412
Body fat percentage	362	2018	Ben Elsworth	Medical Research Council Integrative Epidemiology Unit	European	Males and Females	454,633 European-descent individuals	9851867	ukb-b-8909
Smoking behaviors
Smoking initiation	168	2019	Liu M	GWAS and Sequencing Consortium Of Alcohol And Nicotine Use	European	Males and Females	1,232,091 European-descent individuals	11802365	30643251
Past tobacco smoking	60	2018	Ben Elsworth	Medical Research Council Integrative Epidemiology Unit	European	Males and Females	424,960 European-descent individuals	9851867	ukb-b-2134
Smoking/smokers in household	20	2018	Ben Elsworth	Medical Research Council Integrative Epidemiology Unit	European	Males and Females	425,516 European-descent individuals	9851867	ukb-b-960
Reproductive traits
Age first had sexual intercourse	307	2018	Ben Elsworth	Medical Research Council Integrative Epidemiology Unit	European	Males and Females	406,457 European-descent individuals	9851867	ukb-b-6591
Age at menarche	44	2022	Howe LJ	Within family GWAS consortium	European	Males and Females	29,346 European-descent individuals	7890254	ieu-b-4822
Age at first birth	121	2021	Mills MC	NA	European	NA	542,901 European-descent individuals	9702772	34211149
Outcomes
Spontaneous abortion	-	2022	Kurki	FinnGen Consortium	European	Females	15,073 cases and 135,962 controls of European ancestry	20152136	https://www.finngen.fi/fi
SNP: single nucleotide polymorphism; SD: standard deviation
Identified SNPs*: corresponds to the number of SNPs available in Spontaneous abortion datasets

## Sheet: Table S2
Table S2. Detailed information on genetic instruments
Exposure	SNP	Chr Position	EA	OEA	EAF	BETA	SE	P-value
Waist circumference	rs10195252	2:165513091	C	T	0.4417	-0.035	0.0044	3.7e-15
Waist circumference	rs10516107	5:173348156	A	G	0.2917	0.029	0.0046	3.4e-10
Waist circumference	rs10883738	10:104321721	C	T	0.4333	-0.027	0.0043	1.8e-10
Waist circumference	rs1150781	6:34214322	G	C	0.931	-0.065	0.011	3.1e-09
Waist circumference	rs12317176	12:124404718	C	T	0.3833	-0.034	0.0046	1.3e-13
Waist circumference	rs12679556	8:72514228	G	T	0.2083	0.035	0.0051	1e-11
Waist circumference	rs13173241	5:55861359	A	G	0.1917	0.048	0.0055	2.5e-18
Waist circumference	rs17451107	3:156797609	C	T	0.375	-0.032	0.0046	3.5e-12
Waist circumference	rs1884897	20:6612832	G	A	0.625	-0.035	0.0045	5.9e-15
Waist circumference	rs2071449	12:54428011	A	C	0.325	0.029	0.0047	4.5e-10
Waist circumference	rs2274432	1:184020945	A	G	0.3729	0.027	0.0046	6.8e-09
Waist circumference	rs2294239	22:29449477	G	A	0.45	-0.026	0.0044	4.2e-09
Waist circumference	rs2745349	6:127419834	C	A	0.3167	0.042	0.0048	4.6e-18
Waist circumference	rs3897379	1:219759733	G	A	0.8083	-0.031	0.0055	1.5e-08
Waist circumference	rs648514	3:52467263	A	G	0.5333	0.029	0.0044	5.1e-11
Waist circumference	rs7162542	15:84514290	G	C	0.5167	0.037	0.0043	1.2e-17
Waist circumference	rs7235010	18:20724810	A	G	0.7417	0.037	0.0053	4.9e-12
Waist circumference	rs757608	17:59497277	G	A	0.7	-0.026	0.0047	1.6e-08
Waist circumference	rs7830933	8:23603324	G	A	0.2583	-0.033	0.0051	1.9e-10
Waist circumference	rs849140	7:28183702	C	T	0.6	-0.032	0.0044	5.4e-13
Waist circumference	rs9435732	1:17308158	T	C	0.175	-0.027	0.0049	3e-08
Waist circumference	rs984222	1:119503843	G	C	0.575	0.036	0.0044	3.3e-16
Waist circumference	rs9860730	3:64701146	G	A	0.2333	-0.04	0.0048	7.8e-17
Waist circumference	rs998584	6:43757896	A	C	0.475	0.056	0.0049	4.2e-30
smoking initiation	rs10001365	4:147797214	A	G	0.405	-0.025	0.0036	6.65e-12
smoking initiation	rs10119117	9:29740028	T	C	0.51	0.017	0.0036	1.72e-06
smoking initiation	rs10130576	14:28291917	A	G	0.389	0.019	0.0037	3.16e-07
smoking initiation	rs10179773	2:49849268	A	G	0.217	-0.0194	0.0042	3.89e-06
smoking initiation	rs10260968	7:1889773	A	G	0.597	-0.0203	0.0036	1.75e-08
smoking initiation	rs10279261	7:133589846	A	G	0.619	-0.0214	0.0037	5e-09
smoking initiation	rs10446671	4:35483932	T	C	0.482	0.0165	0.0036	3.28e-06
smoking initiation	rs10498846	6:67405337	T	C	0.473	0.0206	0.0036	6.62e-09
smoking initiation	rs10507911	13:81189301	T	G	0.229	-0.0212	0.0042	5.53e-07
smoking initiation	rs1050847	16:87443734	T	C	0.505	-0.0216	0.0036	1.67e-09
smoking initiation	rs10698713	6:158882320	A	G	0.0545	-0.0425	0.0079	8.29e-08
smoking initiation	rs10819050	9:128237178	T	G	0.423	0.0198	0.0038	1.64e-07
smoking initiation	rs10873871	1:76689019	G	A	0.191	0.0207	0.0043	1.9e-06
smoking initiation	rs10905461	10:8803551	C	T	0.718	-0.024	0.0041	7.35e-09
smoking initiation	rs10934272	3:114151511	T	C	0.736	0.0191	0.0041	3.78e-06
smoking initiation	rs10968592	9:28429226	C	T	0.0773	0.0308	0.0066	3.34e-06
smoking initiation	rs10997380	10:68542366	T	C	0.798	-0.0195	0.0043	4.59e-06
smoking initiation	rs11057005	12:16748721	G	A	0.43	-0.0209	0.0036	4.85e-09
smoking initiation	rs11076967	16:5834006	T	G	0.289	0.0205	0.0041	7.34e-07
smoking initiation	rs11078713	17:7795972	G	A	0.454	-0.0202	0.0036	2.23e-08
smoking initiation	rs11256434	10:10044905	C	T	0.403	-0.0172	0.0036	1.85e-06
smoking initiation	rs1126757	19:55879872	T	C	0.469	0.0187	0.0036	1.53e-07
smoking initiation	rs113746525	2:60977295	T	G	0.0257	-0.0574	0.0115	5.65e-07
smoking initiation	rs1154693	3:117804154	G	A	0.856	0.0326	0.0049	3.12e-11
smoking initiation	rs1160685	4:94052854	G	C	0.478	0.0208	0.0036	7.2e-09
smoking initiation	rs11611651	12:133380790	A	G	0.0781	0.0339	0.0063	8.02e-08
smoking initiation	rs116531886	1:108452826	G	A	0.0529	-0.0362	0.0078	3.47e-06
smoking initiation	rs11658881	17:2072949	G	A	0.418	0.0201	0.0036	2.43e-08
smoking initiation	rs11692232	2:228464165	A	C	0.0994	0.0261	0.0057	4.38e-06
smoking initiation	rs11692435	2:98275354	A	G	0.0856	0.0304	0.0062	8.71e-07
smoking initiation	rs11712680	3:75009019	C	A	0.174	-0.027	0.0046	3.51e-09
smoking initiation	rs117143374	21:40555561	C	T	0.12	0.0293	0.0053	2.76e-08
smoking initiation	rs11716705	3:34728753	G	A	0.253	0.0198	0.0041	1.45e-06
smoking initiation	rs11756490	6:100341774	A	T	0.114	-0.0266	0.0053	4.84e-07
smoking initiation	rs11872397	18:72535282	A	G	0.252	-0.0248	0.0041	1.43e-09
smoking initiation	rs11926232	3:55936417	G	A	0.0485	0.0415	0.008	2.21e-07
smoking initiation	rs11941714	4:31202669	A	G	0.337	-0.0192	0.0038	3.64e-07
smoking initiation	rs12025237	1:154205120	C	A	0.124	-0.033	0.0053	6.52e-10
smoking initiation	rs12047884	1:112142413	G	T	0.515	-0.0176	0.0036	7.53e-07
smoking initiation	rs12186738	5:103816655	T	G	0.154	-0.0333	0.005	3.42e-11
smoking initiation	rs12356821	10:104563808	C	G	0.14	0.0394	0.005	6.27e-15
smoking initiation	rs12441907	15:83922387	A	C	0.186	-0.0292	0.0045	1.06e-10
smoking initiation	rs12474587	2:162802993	T	G	0.404	0.0276	0.0036	1.25e-14
smoking initiation	rs12479064	2:100046038	T	C	0.218	0.0206	0.0044	2.46e-06
smoking initiation	rs12545053	8:65073605	G	A	0.397	0.0203	0.0036	2.43e-08
smoking initiation	rs12671250	7:12284475	G	C	0.559	0.0167	0.0036	2.99e-06
smoking initiation	rs12714017	2:80999398	C	T	0.5	0.0194	0.0037	1.89e-07
smoking initiation	rs13007361	2:166250244	A	G	0.199	0.0223	0.0045	5.45e-07
smoking initiation	rs13013954	2:184439743	C	A	0.2	-0.0202	0.0044	3.78e-06
smoking initiation	rs13030994	2:146143090	A	G	0.485	0.0361	0.0036	3.56e-24
smoking initiation	rs13246563	7:3438243	G	C	0.526	-0.0235	0.0037	3.45e-10
smoking initiation	rs13250170	8:93035331	G	A	0.231	-0.0217	0.0043	3.5e-07
smoking initiation	rs13261666	8:59814666	T	G	0.522	-0.0269	0.0036	3.9e-14
smoking initiation	rs13391128	2:213117204	G	A	0.122	0.0279	0.0053	1.7e-07
smoking initiation	rs134529	22:28781758	C	T	0.349	-0.02	0.0037	4.85e-08
smoking initiation	rs1385108	5:154839646	T	C	0.239	0.0247	0.0042	3e-09
smoking initiation	rs1392510	9:8296740	C	T	0.148	0.0276	0.0051	6.84e-08
smoking initiation	rs1393450	3:173402170	G	T	0.221	0.0198	0.0042	2.71e-06
smoking initiation	rs1406797	3:61907322	C	G	0.303	0.0187	0.004	2.59e-06
smoking initiation	rs1414909	10:82815674	A	G	0.378	0.0179	0.0037	1.19e-06
smoking initiation	rs1445649	2:155682556	C	T	0.525	0.024	0.0036	1.68e-11
smoking initiation	rs145151226	3:109195284	A	C	0.0278	0.0483	0.0103	2.92e-06
smoking initiation	rs147662818	10:126634762	T	C	0.00896	0.1024	0.019	7.25e-08
smoking initiation	rs1485272	3:3727589	C	T	0.355	-0.018	0.0037	1.48e-06
smoking initiation	rs1533772	1:237844948	G	A	0.358	-0.0206	0.0039	1.11e-07
smoking initiation	rs1555445	20:31175258	T	A	0.337	0.0226	0.0038	3.65e-09
smoking initiation	rs1569916	20:54392436	T	C	0.561	-0.0196	0.0036	5.13e-08
smoking initiation	rs1621770	5:50940884	T	A	0.099	-0.0309	0.0064	1.22e-06
smoking initiation	rs16896316	6:65832814	G	A	0.192	0.0221	0.0046	1.24e-06
smoking initiation	rs16975171	18:39269650	A	C	0.0818	-0.0316	0.0067	2.61e-06
smoking initiation	rs17016894	3:25672778	T	C	0.298	-0.0179	0.0039	4.76e-06
smoking initiation	rs1714521	3:158284861	C	A	0.402	-0.0195	0.0036	6.33e-08
smoking initiation	rs17165769	5:107365642	G	A	0.389	0.017	0.0037	3.08e-06
smoking initiation	rs17692129	17:44793283	T	C	0.321	0.0198	0.0038	1.32e-07
smoking initiation	rs1776631	10:31422577	C	T	0.796	-0.0206	0.0043	1.78e-06
smoking initiation	rs1834306	11:122023187	G	A	0.576	-0.0165	0.0036	4.83e-06
smoking initiation	rs1869243	3:5724536	C	T	0.481	0.0197	0.0036	2.97e-08
smoking initiation	rs1899896	8:93201036	T	C	0.286	0.0264	0.0039	1.04e-11
smoking initiation	rs1921087	5:30839607	C	A	0.502	0.0194	0.0036	5.62e-08
smoking initiation	rs1971318	12:121389500	T	C	0.141	0.0285	0.0049	7.06e-09
smoking initiation	rs2010921	11:132098205	A	G	0.305	0.0187	0.0038	1.07e-06
smoking initiation	rs2046850	1:210304319	T	C	0.187	-0.0248	0.0045	3.03e-08
smoking initiation	rs2050586	1:87905828	C	G	0.355	-0.0205	0.0037	3e-08
smoking initiation	rs2072155	7:77762457	C	T	0.697	0.0195	0.0039	5.47e-07
smoking initiation	rs2074118	7:111395987	G	A	0.7	-0.0201	0.004	6.22e-07
smoking initiation	rs2107300	2:200937901	G	C	0.845	-0.0272	0.0049	3.27e-08
smoking initiation	rs2173019	5:167614971	A	T	0.191	0.024	0.0047	2.76e-07
smoking initiation	rs2196356	3:70890288	C	G	0.274	-0.0197	0.004	6.74e-07
smoking initiation	rs222449	6:52916062	T	A	0.793	-0.0253	0.0044	1.08e-08
smoking initiation	rs2378662	9:86707289	A	G	0.556	0.0209	0.0036	4.16e-09
smoking initiation	rs2547030	16:24853918	A	G	0.639	0.0172	0.0038	4.71e-06
smoking initiation	rs2551456	18:53702160	A	C	0.451	0.0179	0.0036	5.5e-07
smoking initiation	rs2595255	3:159035620	T	G	0.395	-0.0174	0.0036	1.4e-06
smoking initiation	rs2631024	8:91995577	G	A	0.737	-0.023	0.004	1.18e-08
smoking initiation	rs2710634	2:32808804	C	T	0.505	-0.0182	0.0036	3.07e-07
smoking initiation	rs2835985	21:39190006	G	C	0.506	0.0167	0.0036	2.55e-06
smoking initiation	rs2917666	16:69763960	G	C	0.661	-0.019	0.0039	9.04e-07
smoking initiation	rs2958853	11:41435765	A	G	0.475	-0.0177	0.0036	6.4e-07
smoking initiation	rs2959100	11:46015138	G	C	0.461	-0.0187	0.0036	1.75e-07
smoking initiation	rs2960029	18:27796551	A	G	0.238	0.0198	0.0041	1.49e-06
smoking initiation	rs3001723	1:44037685	A	G	0.321	0.0335	0.0039	8.12e-18
smoking initiation	rs3213876	18:73183978	C	T	0.301	0.0193	0.0037	2.24e-07
smoking initiation	rs324768	12:83969100	G	A	0.363	-0.0181	0.0037	6.92e-07
smoking initiation	rs35702515	2:137542847	T	G	0.162	0.0252	0.0042	2.43e-09
smoking initiation	rs35887108	3:143780632	T	C	0.261	-0.0209	0.0043	9.74e-07
smoking initiation	rs3801289	7:96638267	C	A	0.351	-0.0221	0.0037	3.74e-09
smoking initiation	rs3811038	2:113240183	C	T	0.272	0.019	0.004	1.58e-06
smoking initiation	rs3904512	13:38357471	A	G	0.429	-0.0212	0.0036	3.23e-09
smoking initiation	rs3934797	4:112467612	A	G	0.17	-0.0243	0.0046	1.53e-07
smoking initiation	rs4044321	5:166989513	G	A	0.642	-0.0278	0.0037	6.08e-14
smoking initiation	rs41264285	1:155033918	T	C	0.195	0.0231	0.0043	6.76e-08
smoking initiation	rs41274959	9:103068966	A	G	0.0331	-0.048	0.0092	1.93e-07
smoking initiation	rs4236259	7:1708080	G	T	0.499	-0.0248	0.0036	3.35e-12
smoking initiation	rs4433590	11:73310668	A	G	0.831	-0.0226	0.0047	1.34e-06
smoking initiation	rs4518351	5:22219503	G	A	0.428	0.0174	0.0036	1.12e-06
smoking initiation	rs4523689	11:7950797	G	A	0.408	-0.0206	0.0036	1.55e-08
smoking initiation	rs4543592	9:3014254	C	T	0.468	0.0219	0.0036	7.46e-10
smoking initiation	rs4674993	2:226332033	G	A	0.207	-0.0252	0.0044	1.32e-08
smoking initiation	rs4713121	6:27722064	C	T	0.231	-0.022	0.0042	1.17e-07
smoking initiation	rs4714071	6:37474393	T	C	0.511	-0.0176	0.0036	6.95e-07
smoking initiation	rs4781977	16:17572674	C	T	0.205	-0.0239	0.0044	4.54e-08
smoking initiation	rs4785187	16:49766772	A	G	0.229	0.0202	0.0043	2.06e-06
smoking initiation	rs4785836	16:65604652	C	T	0.398	-0.0205	0.0037	2.26e-08
smoking initiation	rs480939	11:92282413	A	G	0.561	-0.0188	0.0036	1.48e-07
smoking initiation	rs4822102	22:42698430	T	C	0.613	-0.0185	0.0036	3.97e-07
smoking initiation	rs4837631	9:122061948	T	C	0.436	-0.0181	0.0036	4.1e-07
smoking initiation	rs501796	18:7466110	A	G	0.517	0.0166	0.0036	3.13e-06
smoking initiation	rs55958435	15:96852638	G	A	0.24	-0.0212	0.0041	1.92e-07
smoking initiation	rs55968130	16:49618174	A	C	0.0899	0.03	0.0059	3.88e-07
smoking initiation	rs56169608	1:18439991	A	G	0.45	0.0167	0.0036	2.82e-06
smoking initiation	rs568599	11:121536011	C	G	0.523	0.019	0.0036	9.46e-08
smoking initiation	rs61533748	2:22582968	C	T	0.375	0.019	0.0037	1.85e-07
smoking initiation	rs61959481	13:55834929	A	G	0.207	-0.0226	0.0043	1.91e-07
smoking initiation	rs62074192	17:16245127	A	G	0.511	-0.0163	0.0036	4.95e-06
smoking initiation	rs62340589	4:176875795	C	G	0.192	0.0207	0.0044	2.09e-06
smoking initiation	rs628891	18:8381073	T	C	0.302	-0.0195	0.0038	3.92e-07
smoking initiation	rs6433897	2:182034448	C	T	0.754	0.0224	0.0041	3.16e-08
smoking initiation	rs644400	6:94174210	A	G	0.433	0.0165	0.0036	4.51e-06
smoking initiation	rs6508144	18:50026142	G	C	0.563	-0.0207	0.0036	7.97e-09
smoking initiation	rs6800583	3:16851755	A	G	0.363	0.0198	0.0037	6.73e-08
smoking initiation	rs6893752	5:60374912	G	A	0.766	-0.0241	0.0041	3.25e-09
smoking initiation	rs6914489	6:97696564	T	C	0.74	0.0204	0.0041	6.5e-07
smoking initiation	rs694739	11:64097233	G	A	0.363	-0.0187	0.0037	3.27e-07
smoking initiation	rs6956116	7:122246338	A	G	0.338	0.0172	0.0037	4.4e-06
smoking initiation	rs6974377	7:21397405	C	T	0.316	0.0201	0.0039	1.91e-07
smoking initiation	rs71600499	4:121635598	C	G	0.276	-0.0182	0.0039	3.63e-06
smoking initiation	rs7197072	16:717085	T	C	0.238	-0.0248	0.0042	2.77e-09
smoking initiation	rs7224742	17:30657058	T	C	0.595	-0.0207	0.0037	1.43e-08
smoking initiation	rs72730742	15:78097213	C	A	0.0898	-0.0309	0.0061	3.89e-07
smoking initiation	rs72789632	5:06834363	T	C	0.12	-0.0329	0.0053	5.02e-10
smoking initiation	rs72802545	10:72724102	C	A	0.174	-0.0223	0.0047	2.35e-06
smoking initiation	rs72896886	18:42632652	C	G	0.144	-0.0269	0.0048	2.75e-08
smoking initiation	rs72976160	18:77497695	A	G	0.166	0.0227	0.0045	3.87e-07
smoking initiation	rs7322872	13:100548329	T	C	0.782	-0.0256	0.0043	3.58e-09
smoking initiation	rs73654326	9:23575360	T	A	0.287	-0.0184	0.0039	2.79e-06
smoking initiation	rs74876138	3:171518379	C	T	0.234	0.02	0.004	7.42e-07
smoking initiation	rs7505855	18:31696075	T	C	0.596	-0.019	0.0036	1.45e-07
smoking initiation	rs7555507	1:73766037	T	C	0.496	-0.0241	0.0036	1.14e-11
smoking initiation	rs7585579	2:60024857	G	C	0.505	0.0224	0.0037	1.88e-09
smoking initiation	rs76214862	14:29500130	C	A	0.202	-0.025	0.0045	3.99e-08
smoking initiation	rs7631379	3:181409057	C	T	0.207	0.0219	0.0044	6.58e-07
smoking initiation	rs76608582	19:4474725	A	C	0.0389	-0.0496	0.0083	1.94e-09
smoking initiation	rs77075313	15:63901776	G	A	0.0447	-0.0429	0.0087	8.15e-07
smoking initiation	rs7717387	5:91255566	T	C	0.953	-0.045	0.0091	6.97e-07
smoking initiation	rs77803288	14:90057852	T	C	0.0461	-0.0385	0.0081	2.24e-06
smoking initiation	rs78648167	11:87073001	G	A	0.083	-0.0291	0.0063	3.65e-06
smoking initiation	rs7921378	10:63674885	C	G	0.463	-0.0255	0.0036	8.26e-13
smoking initiation	rs79222572	6:165108555	G	T	0.251	0.0195	0.0041	2.04e-06
smoking initiation	rs7929518	11:85980958	G	A	0.765	0.0242	0.0043	1.56e-08
smoking initiation	rs7999164	13:101254933	A	G	0.549	0.0175	0.0036	9.5e-07
smoking initiation	rs8010469	14:58643368	G	A	0.54	-0.0177	0.0036	7.56e-07
smoking initiation	rs8027457	15:99204101	C	T	0.524	0.0188	0.0036	1.2e-07
smoking initiation	rs9423279	10:125680419	G	C	0.641	-0.0205	0.0037	3.21e-08
smoking initiation	rs9471935	6:42840318	A	G	0.232	0.0203	0.0043	1.91e-06
smoking initiation	rs9540729	13:66947124	T	A	0.501	-0.0196	0.0036	3.82e-08
smoking initiation	rs9603051	13:37093427	G	A	0.513	0.017	0.0036	1.78e-06
smoking initiation	rs962625	4:28473524	G	A	0.24	0.0237	0.004	4.37e-09
smoking initiation	rs9627272	22:46442288	C	G	0.416	-0.0191	0.0036	1.37e-07
smoking initiation	rs9880657	3:131912890	T	A	0.746	-0.0188	0.004	3.25e-06
Past tobacco smoking	rs10956808	8:92775372	G	T	0.422089	0.0189115	0.00273732	4.90004e-12
Past tobacco smoking	rs10959442	9:10993737	G	T	0.46641	-0.0171998	0.00269923	1.89998e-10
Past tobacco smoking	rs1109480	12:121083279	A	G	0.389103	0.0163393	0.0027867	4.49997e-09
Past tobacco smoking	rs1174864	7:53127559	A	G	0.54986	-0.0153603	0.0027134	1.5e-08
Past tobacco smoking	rs12209519	6:67549140	G	A	0.407575	-0.0158856	0.0027537	8e-09
Past tobacco smoking	rs12450028	17:2207425	T	C	0.345053	-0.0166053	0.0028331	4.60002e-09
Past tobacco smoking	rs12487411	3:34422170	A	G	0.470776	0.0167975	0.00270032	5e-10
Past tobacco smoking	rs12608052	18:49803160	T	C	0.518925	0.0161105	0.0027009	2.39999e-09
Past tobacco smoking	rs12895462	14:77615441	C	T	0.191374	0.0200066	0.00344429	6.29999e-09
Past tobacco smoking	rs13009008	2:174043233	G	A	0.672659	0.0157552	0.00286663	3.89996e-08
Past tobacco smoking	rs139896	22:38397797	C	T	0.64784	-0.0162135	0.00282014	8.99995e-09
Past tobacco smoking	rs147052174	1:179783167	T	G	0.018556	-0.0603916	0.00997369	1.40001e-09
Past tobacco smoking	rs1499300	7:132311000	C	A	0.157852	0.0217944	0.00369422	3.59998e-09
Past tobacco smoking	rs1499976	3:117801330	C	T	0.852678	-0.0314256	0.00381927	1.9002e-16
Past tobacco smoking	rs1559278	5:50794221	C	T	0.361217	0.0154864	0.0028052	3.40001e-08
Past tobacco smoking	rs1611723	6:29830505	G	A	0.405117	0.0158409	0.00273899	7.29995e-09
Past tobacco smoking	rs17503369	1:73847108	C	T	0.182208	0.0216357	0.00350324	6.59994e-10
Past tobacco smoking	rs2367724	1:44107428	T	C	0.673602	0.0160073	0.00287009	2.39999e-08
Past tobacco smoking	rs2433055	8:133769805	G	T	0.447651	0.0148366	0.00271458	4.60002e-08
Past tobacco smoking	rs27003	5:94202167	C	T	0.695133	-0.0164348	0.00293828	2.19999e-08
Past tobacco smoking	rs2797793	6:37477262	C	T	0.603851	0.0152706	0.00275684	2.99999e-08
Past tobacco smoking	rs2862465	11:42379492	A	G	0.409159	0.0158416	0.00273873	7.29995e-09
Past tobacco smoking	rs28647734	9:137977033	A	G	0.210012	-0.0191736	0.00332696	8.30004e-09
Past tobacco smoking	rs290882	2:118262987	C	T	0.245196	0.0174671	0.00312719	2.30001e-08
Past tobacco smoking	rs2952251	8:10143164	G	A	0.739866	-0.0175299	0.00307867	1.2e-08
Past tobacco smoking	rs35761479	1:154154194	A	G	0.120751	0.0229646	0.00413628	2.80001e-08
Past tobacco smoking	rs3808937	10:104230012	T	C	0.207824	-0.020549	0.00332265	6.19998e-10
Past tobacco smoking	rs3811038	2:113240183	C	T	0.275964	-0.0170544	0.00302893	1.79999e-08
Past tobacco smoking	rs3827592	4:147948150	A	G	0.350953	0.0177215	0.00282961	3.79997e-10
Past tobacco smoking	rs3857914	8:93184065	C	T	0.302135	-0.0201533	0.00295853	9.60064e-12
Past tobacco smoking	rs3935790	1:208725458	A	G	0.416104	-0.0154673	0.00273757	1.6e-08
Past tobacco smoking	rs4044321	5:166989513	G	A	0.641902	0.0183697	0.00281594	6.89922e-11
Past tobacco smoking	rs4708899	6:157751114	G	A	0.575572	0.0158982	0.00273541	6.19998e-09
Past tobacco smoking	rs540356	11:132203816	A	C	0.413629	-0.0184455	0.00276048	2.39994e-11
Past tobacco smoking	rs56081685	13:59454140	G	T	0.31367	0.016504	0.00291156	1.40001e-08
Past tobacco smoking	rs58400863	4:31184484	A	G	0.341566	0.0176273	0.00285288	6.49995e-10
Past tobacco smoking	rs6141314	20:31093514	A	G	0.241567	-0.0191608	0.00316833	1.5e-09
Past tobacco smoking	rs6464024	7:1688369	T	C	0.427444	0.0175549	0.00272318	1.09999e-10
Past tobacco smoking	rs6828849	4:173077123	T	A	0.418816	0.017917	0.00273434	5.70033e-11
Past tobacco smoking	rs71491831	11:124605783	A	G	0.075719	0.0305743	0.00510011	2e-09
Past tobacco smoking	rs7216173	17:51891405	T	A	0.782099	0.0207755	0.00330934	3.40001e-10
Past tobacco smoking	rs7333559	13:100546450	A	G	0.788658	0.0199661	0.00332049	1.79999e-09
Past tobacco smoking	rs7582445	2:60495874	C	A	0.587784	-0.0172231	0.00273796	3.2e-10
Past tobacco smoking	rs7600005	2:48212055	A	G	0.373357	0.0156078	0.00280252	2.59998e-08
Past tobacco smoking	rs7609050	2:156021862	C	A	0.525594	-0.0157639	0.00269618	5e-09
Past tobacco smoking	rs762995	22:42672124	G	A	0.535061	0.0148727	0.00270202	3.69999e-08
Past tobacco smoking	rs77068442	1:158845316	G	A	0.107228	-0.0239119	0.00435686	4.09996e-08
Past tobacco smoking	rs77304846	4:70495353	C	T	0.183007	0.0208584	0.00348154	2.1e-09
Past tobacco smoking	rs7733542	5:106410664	G	A	0.629381	-0.0156617	0.0028111	2.5e-08
Past tobacco smoking	rs77878475	16:18058548	A	T	0.084274	0.0330817	0.0050303	4.79954e-11
Past tobacco smoking	rs7901348	10:63679281	G	T	0.552343	0.0192949	0.00272924	1.59993e-12
Past tobacco smoking	rs8034783	15:47763726	T	C	0.101047	-0.0282475	0.0044944	3.29997e-10
Past tobacco smoking	rs8071295	17:50131994	A	C	0.157348	0.0225071	0.00371608	1.40001e-09
Past tobacco smoking	rs885011	7:3484778	C	T	0.501337	0.020272	0.00269531	5.40008e-14
Past tobacco smoking	rs911773	10:123964980	C	A	0.489521	0.0152558	0.00269417	1.5e-08
Past tobacco smoking	rs9299331	9:102146915	C	T	0.526134	-0.0174941	0.00269915	9.09913e-11
Past tobacco smoking	rs9375371	6:98751680	A	G	0.269381	-0.0198988	0.00304394	6.29941e-11
Past tobacco smoking	rs9423279	10:125680419	G	C	0.657058	0.0164476	0.00289194	1.29999e-08
Past tobacco smoking	rs9542750	13:72393720	C	T	0.585734	0.0151549	0.00275108	3.59998e-08
Past tobacco smoking	rs963354	3:157393770	A	C	0.67342	-0.0176444	0.00287718	8.70001e-10
Leg fat percentage (left)	rs1005551	17:34949361	T	C	0.4083	-0.0108	0.0015	2.97e-12
Leg fat percentage (left)	rs10209821	2:228980358	T	C	0.3411	0.0119	0.0016	1.33e-13
Leg fat percentage (left)	rs10423928	19:46182304	A	T	0.1935	-0.0196	0.0019	1.25e-24
Leg fat percentage (left)	rs1046080	6:31595882	A	C	0.7193	0.016	0.0017	2.5e-21
Leg fat percentage (left)	rs10499014	6:97947755	G	C	0.2679	-0.0125	0.0017	3.81e-13
Leg fat percentage (left)	rs10514641	2:41548779	G	C	0.3106	0.0104	0.0017	3.7e-10
Leg fat percentage (left)	rs1056441	20:62370349	C	T	0.6732	0.0115	0.0016	1.23e-12
Leg fat percentage (left)	rs10756798	9:16739763	T	C	0.645	-0.0123	0.0016	8.47e-15
Leg fat percentage (left)	rs10787738	10:118777371	T	C	0.2533	0.012	0.0018	1.04e-11
Leg fat percentage (left)	rs10823595	10:72422354	A	G	0.2523	0.0112	0.0018	1.74e-10
Leg fat percentage (left)	rs10854853	22:48874412	T	G	0.4581	0.0085	0.0015	2.41e-08
Leg fat percentage (left)	rs10883026	10:99793865	T	C	0.5204	-0.0108	0.0015	1.38e-12
Leg fat percentage (left)	rs10885421	10:114916586	T	G	0.5967	-0.0094	0.0016	1.72e-09
Leg fat percentage (left)	rs10938397	4:45182527	G	A	0.4341	0.0152	0.0015	4.29e-23
Leg fat percentage (left)	rs10995427	10:64842838	A	G	0.3608	-0.0099	0.0016	4.78e-10
Leg fat percentage (left)	rs10997957	10:69916441	A	G	0.537	-0.0103	0.0015	1.39e-11
Leg fat percentage (left)	rs11012732	10:21830104	G	A	0.3311	0.0156	0.0016	5.79e-22
Leg fat percentage (left)	rs11055949	12:14509652	C	T	0.553	0.0083	0.0015	4.72e-08
Leg fat percentage (left)	rs11062585	12:3340321	T	C	0.0967	-0.0188	0.0026	2.66e-13
Leg fat percentage (left)	rs11062590	12:3355168	G	C	0.0919	-0.0146	0.0027	3.99e-08
Leg fat percentage (left)	rs11077204	16:7667187	G	C	0.7537	-0.0097	0.0018	4.86e-08
Leg fat percentage (left)	rs11150745	17:78757626	G	A	0.3195	-0.0101	0.0016	5.84e-10
Leg fat percentage (left)	rs111743285	6:127048230	T	C	0.2225	0.0125	0.0018	9.01e-12
Leg fat percentage (left)	rs11200784	10:85769808	C	T	0.3252	-0.0091	0.0016	2.32e-08
Leg fat percentage (left)	rs11201985	10:88097795	A	G	0.4554	0.0091	0.0015	3.26e-09
Leg fat percentage (left)	rs1127100	1:32193647	C	T	0.6482	0.0106	0.0016	3.49e-11
Leg fat percentage (left)	rs112852122	20:47498117	A	G	0.1614	-0.0143	0.0021	1.03e-11
Leg fat percentage (left)	rs11642015	16:53802494	T	C	0.4024	0.0319	0.0015	1.91e-94
Leg fat percentage (left)	rs11668601	19:18214521	C	T	0.2533	0.0158	0.0017	1.87e-19
Leg fat percentage (left)	rs11669185	19:31016277	C	T	0.1564	-0.0119	0.0021	1.24e-08
Leg fat percentage (left)	rs11669516	19:19532682	A	G	0.1863	0.0131	0.002	1.97e-11
Leg fat percentage (left)	rs11673813	2:203876923	T	A	0.5498	0.0088	0.0015	7.5e-09
Leg fat percentage (left)	rs11688365	2:159306290	T	C	0.2647	-0.0094	0.0017	4.95e-08
Leg fat percentage (left)	rs11695700	2:110008322	T	G	0.4177	0.0086	0.0015	2.37e-08
Leg fat percentage (left)	rs117068593	14:93118229	T	C	0.1893	-0.0123	0.0019	2.15e-10
Leg fat percentage (left)	rs11745618	5:105773821	G	A	0.5664	0.0093	0.0015	1.57e-09
Leg fat percentage (left)	rs11766468	7:2082604	A	G	0.1468	-0.0129	0.0021	1.98e-09
Leg fat percentage (left)	rs11824092	11:13346294	C	T	0.6375	0.0101	0.0016	2.36e-10
Leg fat percentage (left)	rs11841757	13:99242255	G	A	0.2391	-0.0125	0.0018	2.08e-12
Leg fat percentage (left)	rs11855853	15:78012618	T	C	0.2687	-0.0116	0.0017	1.51e-11
Leg fat percentage (left)	rs11866219	16:69549749	C	A	0.5837	-0.0116	0.0016	1.18e-13
Leg fat percentage (left)	rs11987859	8:106424074	G	A	0.202	0.0103	0.0019	4.59e-08
Leg fat percentage (left)	rs12042959	1:243533273	G	A	0.1458	-0.0142	0.0022	6.24e-11
Leg fat percentage (left)	rs12122664	1:91220615	C	A	0.3147	0.0091	0.0016	3.23e-08
Leg fat percentage (left)	rs12124126	1:6660349	G	A	0.3338	-0.0117	0.0016	4.84e-13
Leg fat percentage (left)	rs12140153	1:62579891	T	G	0.0968	-0.0169	0.0026	1.45e-10
Leg fat percentage (left)	rs12273545	11:116911012	T	C	0.0558	0.0195	0.0033	3.86e-09
Leg fat percentage (left)	rs12330631	3:123089834	T	C	0.3671	-0.0103	0.0016	6.2e-11
Leg fat percentage (left)	rs12339822	9:92187178	G	A	0.5432	0.0109	0.0015	9.85e-13
Leg fat percentage (left)	rs12355619	10:30584513	T	C	0.0754	0.0168	0.0029	5.62e-09
Leg fat percentage (left)	rs12367809	12:50256063	T	C	0.3683	0.0139	0.0016	1.65e-18
Leg fat percentage (left)	rs12438864	15:73095668	C	T	0.7685	0.0134	0.0018	1.6e-13
Leg fat percentage (left)	rs12443840	16:8311504	T	C	0.4409	-0.0089	0.0015	8.94e-09
Leg fat percentage (left)	rs12477385	2:166144850	T	G	0.2273	-0.0132	0.0018	3.84e-13
Leg fat percentage (left)	rs12548773	8:76825853	T	C	0.2977	-0.012	0.0017	5.58e-13
Leg fat percentage (left)	rs12583872	13:86352708	C	A	0.3097	-0.0102	0.0016	5.73e-10
Leg fat percentage (left)	rs12602556	17:65826861	G	A	0.1954	0.0159	0.0019	1.19e-16
Leg fat percentage (left)	rs12619178	2:100838157	T	C	0.4029	-0.0108	0.0015	3.63e-12
Leg fat percentage (left)	rs12679106	8:73443198	T	G	0.7113	-0.0143	0.0017	2.24e-17
Leg fat percentage (left)	rs12710011	19:33965816	A	G	0.3496	0.0109	0.0016	9.16e-12
Leg fat percentage (left)	rs12806052	11:134518868	T	C	0.1655	-0.0161	0.002	4.2e-15
Leg fat percentage (left)	rs12870879	13:20487343	G	A	0.1428	0.0136	0.0022	4.55e-10
Leg fat percentage (left)	rs12890931	14:69753369	G	T	0.3635	0.01	0.0016	3.17e-10
Leg fat percentage (left)	rs1296328	4:137083193	C	A	0.5599	-0.0102	0.0015	3.5e-11
Leg fat percentage (left)	rs13062093	3:35667057	G	T	0.3664	0.0121	0.0016	1.41e-14
Leg fat percentage (left)	rs13109830	4:83208957	G	A	0.4588	-0.0085	0.0015	2.78e-08
Leg fat percentage (left)	rs13427822	2:213414265	G	A	0.2721	-0.0108	0.0017	3.79e-10
Leg fat percentage (left)	rs136309	22:31175525	A	C	0.2051	0.0114	0.0019	1.23e-09
Leg fat percentage (left)	rs1412239	9:28425515	G	C	0.3245	0.0119	0.0016	2.25e-13
Leg fat percentage (left)	rs143453062	1:150340182	G	A	0.0576	-0.0205	0.0033	3.06e-10
Leg fat percentage (left)	rs1441264	13:79580919	A	G	0.5919	0.0107	0.0016	1.3e-11
Leg fat percentage (left)	rs1446585	2:136407479	G	A	0.228	-0.0113	0.0018	5.26e-10
Leg fat percentage (left)	rs1454687	3:94038085	G	C	0.5151	-0.011	0.0015	4.22e-13
Leg fat percentage (left)	rs147730268	12:123024476	T	G	0.0905	-0.0208	0.0027	2.88e-14
Leg fat percentage (left)	rs1490382	1:195050526	G	A	0.3765	-0.0091	0.0016	7.01e-09
Leg fat percentage (left)	rs1503527	5:63020536	T	C	0.4797	0.0104	0.0015	6.32e-12
Leg fat percentage (left)	rs1538742	1:219668252	A	C	0.5696	-0.011	0.0015	9.07e-13
Leg fat percentage (left)	rs1653892	7:32399469	C	T	0.6956	-0.0113	0.0017	1.13e-11
Leg fat percentage (left)	rs17024393	1:110154688	C	T	0.0258	0.0297	0.0048	6.38e-10
Leg fat percentage (left)	rs17193211	21:38885506	T	C	0.0669	-0.0178	0.0031	1.01e-08
Leg fat percentage (left)	rs173823	5:103954801	A	T	0.3291	0.0091	0.0016	1.51e-08
Leg fat percentage (left)	rs17522122	14:33302882	T	G	0.4703	0.0094	0.0015	7.77e-10
Leg fat percentage (left)	rs1774853	1:117930095	C	T	0.3512	0.0089	0.0016	2.11e-08
Leg fat percentage (left)	rs1783541	11:65294799	T	C	0.2185	0.0117	0.0018	1.93e-10
Leg fat percentage (left)	rs1922879	7:147658539	A	G	0.3342	-0.0091	0.0016	1.55e-08
Leg fat percentage (left)	rs1928185	6:50935513	C	T	0.1684	0.0193	0.002	2.24e-21
Leg fat percentage (left)	rs1928496	13:31012904	T	C	0.7424	0.0118	0.0017	1.09e-11
Leg fat percentage (left)	rs2033530	6:40347918	G	A	0.4045	0.0094	0.0016	1.45e-09
Leg fat percentage (left)	rs2035806	10:133984916	A	G	0.5664	-0.0112	0.0015	2.72e-13
Leg fat percentage (left)	rs2035936	3:141298124	T	G	0.0566	0.019	0.0034	1.49e-08
Leg fat percentage (left)	rs2052607	18:40788387	A	G	0.3448	-0.0095	0.0016	2.91e-09
Leg fat percentage (left)	rs208477	6:66920846	T	C	0.1864	0.0107	0.0019	3.78e-08
Leg fat percentage (left)	rs2112347	5:75015242	G	T	0.3592	-0.014	0.0016	9.08e-19
Leg fat percentage (left)	rs2118793	5:152509939	A	C	0.5759	-0.0086	0.0015	2.24e-08
Leg fat percentage (left)	rs2126165	5:153167595	G	A	0.5112	-0.0095	0.0015	3.67e-10
Leg fat percentage (left)	rs2180744	1:34293885	T	C	0.4755	-0.0084	0.0015	4.55e-08
Leg fat percentage (left)	rs228446	6:134901441	C	T	0.6411	0.0095	0.0016	1.82e-09
Leg fat percentage (left)	rs2287894	5:170322919	A	T	0.729	0.0098	0.0017	8.94e-09
Leg fat percentage (left)	rs2289379	7:44804225	T	C	0.395	-0.0116	0.0016	9.08e-14
Leg fat percentage (left)	rs2318543	4:67803263	G	A	0.7825	-0.0104	0.0018	1.85e-08
Leg fat percentage (left)	rs2319849	16:64717191	G	C	0.1397	-0.0127	0.0022	1.01e-08
Leg fat percentage (left)	rs2330089	5:43208477	T	C	0.3428	0.009	0.0016	2.32e-08
Leg fat percentage (left)	rs2370982	14:79890677	T	C	0.2153	0.0157	0.0019	4.22e-17
Leg fat percentage (left)	rs2396625	7:113028634	A	T	0.4206	-0.0093	0.0015	1.52e-09
Leg fat percentage (left)	rs2398861	9:96430747	G	A	0.2566	0.013	0.0017	8.29e-14
Leg fat percentage (left)	rs241459	1:49757268	C	A	0.6803	-0.0122	0.0016	5.24e-14
Leg fat percentage (left)	rs2436772	2:47283557	A	G	0.2088	-0.0122	0.0019	7.4e-11
Leg fat percentage (left)	rs2608703	12:41846769	A	C	0.4609	0.0084	0.0015	3.48e-08
Leg fat percentage (left)	rs2644135	1:201856256	G	C	0.6543	-0.0138	0.0016	5.6e-18
Leg fat percentage (left)	rs2702123	2:24562699	C	T	0.0854	-0.0156	0.0027	1.02e-08
Leg fat percentage (left)	rs2725370	8:30852826	C	T	0.6962	-0.0122	0.0017	1.67e-13
Leg fat percentage (left)	rs2737251	8:116662108	T	C	0.338	-0.0117	0.0016	2.8e-13
Leg fat percentage (left)	rs2802295	6:108926496	G	A	0.6282	0.0093	0.0016	3.9e-09
Leg fat percentage (left)	rs2814967	6:34712838	T	C	0.3285	0.015	0.0016	1.94e-20
Leg fat percentage (left)	rs2815748	1:72816147	A	G	0.8018	0.0189	0.0019	3.76e-23
Leg fat percentage (left)	rs28457808	7:99023246	G	C	0.1632	-0.014	0.0021	1.11e-11
Leg fat percentage (left)	rs2861685	2:67837553	C	T	0.4114	-0.0104	0.0015	1.8e-11
Leg fat percentage (left)	rs2865383	4:96152313	C	T	0.3776	0.0089	0.0016	1.43e-08
Leg fat percentage (left)	rs2867131	2:610603	C	T	0.83	0.0212	0.002	1.34e-25
Leg fat percentage (left)	rs28726372	1:84353839	C	T	0.3078	0.0093	0.0016	1.4e-08
Leg fat percentage (left)	rs2955242	17:61948457	C	A	0.3251	0.0097	0.0016	1.9e-09
Leg fat percentage (left)	rs34483452	5:87986314	A	C	0.1352	0.0174	0.0022	7.02e-15
Leg fat percentage (left)	rs34699890	7:100790412	A	G	0.3834	-0.0089	0.0016	1.34e-08
Leg fat percentage (left)	rs34811474	4:25408838	A	G	0.2319	-0.0134	0.0018	8.29e-14
Leg fat percentage (left)	rs3749472	4:56294032	G	A	0.4616	0.0089	0.0015	4.88e-09
Leg fat percentage (left)	rs3764002	12:108618630	T	C	0.261	-0.0148	0.0017	1.2e-17
Leg fat percentage (left)	rs3784699	15:68007591	C	T	0.603	0.0139	0.0016	4.7e-19
Leg fat percentage (left)	rs3803286	14:103246470	G	A	0.6664	-0.0117	0.0016	3.64e-13
Leg fat percentage (left)	rs3897102	12:123492112	T	C	0.4122	0.0102	0.0016	5.91e-11
Leg fat percentage (left)	rs40071	5:107496102	C	T	0.1793	-0.0151	0.002	2.5e-14
Leg fat percentage (left)	rs4073582	11:66050712	A	G	0.3598	-0.0115	0.0016	3.78e-13
Leg fat percentage (left)	rs424708	22:18214192	G	C	0.171	0.0114	0.002	1.47e-08
Leg fat percentage (left)	rs429358	19:45411941	C	T	0.1563	-0.0162	0.0021	9.24e-15
Leg fat percentage (left)	rs4322261	1:98405856	A	G	0.8358	-0.0119	0.0021	6.87e-09
Leg fat percentage (left)	rs4467770	6:12086826	A	G	0.7307	0.0107	0.0017	4.58e-10
Leg fat percentage (left)	rs4471907	2:193870095	A	G	0.5288	0.0092	0.0015	1.3e-09
Leg fat percentage (left)	rs4477562	13:54104968	T	C	0.1285	0.0125	0.0023	4.53e-08
Leg fat percentage (left)	rs4503172	9:124640841	T	C	0.6078	-0.0101	0.0016	7.95e-11
Leg fat percentage (left)	rs4547574	2:48541003	T	A	0.2259	-0.0106	0.0018	4.99e-09
Leg fat percentage (left)	rs45593734	16:334732	T	C	0.1676	-0.012	0.0021	6e-09
Leg fat percentage (left)	rs4575361	12:124410529	T	A	0.311	0.0093	0.0016	1.61e-08
Leg fat percentage (left)	rs4648450	1:2723214	A	C	0.4661	-0.0087	0.0015	1.45e-08
Leg fat percentage (left)	rs4682711	3:43987663	C	T	0.4087	-0.0097	0.0015	3.49e-10
Leg fat percentage (left)	rs4718964	7:70038969	T	G	0.4122	0.0113	0.0015	3.14e-13
Leg fat percentage (left)	rs4740627	9:15857875	C	T	0.4431	-0.0173	0.0015	1.5e-29
Leg fat percentage (left)	rs4790292	17:1824305	A	C	0.1541	-0.0179	0.0021	2.14e-17
Leg fat percentage (left)	rs4893975	2:178520746	G	A	0.8142	-0.0111	0.002	1.32e-08
Leg fat percentage (left)	rs497418	2:147842671	C	A	0.6151	-0.0089	0.0016	1.42e-08
Leg fat percentage (left)	rs4981693	14:29680331	A	G	0.7727	0.0109	0.0018	2.1e-09
Leg fat percentage (left)	rs525101	13:111969728	C	T	0.372	0.0105	0.0016	2.97e-11
Leg fat percentage (left)	rs529200	3:173114305	G	A	0.5259	0.0084	0.0015	3.52e-08
Leg fat percentage (left)	rs538656	18:57850422	T	G	0.2349	0.0185	0.0018	4.43e-25
Leg fat percentage (left)	rs539515	1:177889025	C	A	0.2075	0.0204	0.0019	9.55e-28
Leg fat percentage (left)	rs55707359	11:46159333	G	T	0.015	0.0346	0.0063	3.72e-08
Leg fat percentage (left)	rs56161855	17:46288649	T	A	0.132	0.0125	0.0022	2.27e-08
Leg fat percentage (left)	rs56184324	2:44765861	A	G	0.7562	0.0098	0.0018	2.83e-08
Leg fat percentage (left)	rs56356382	19:4064057	C	T	0.1927	-0.0167	0.0019	5.6e-18
Leg fat percentage (left)	rs56375099	4:140848823	T	C	0.2663	-0.0097	0.0017	1.85e-08
Leg fat percentage (left)	rs56399737	13:33381721	T	C	0.4488	-0.0096	0.0015	3.24e-10
Leg fat percentage (left)	rs56803094	15:99222509	G	A	0.2271	-0.0114	0.0018	3.31e-10
Leg fat percentage (left)	rs57636386	18:58048295	C	T	0.0834	-0.0203	0.0028	1.69e-13
Leg fat percentage (left)	rs57866767	10:96023077	C	T	0.4324	-0.0127	0.0015	1.38e-16
Leg fat percentage (left)	rs588660	1:96886604	A	G	0.5859	0.0096	0.0015	4.96e-10
Leg fat percentage (left)	rs59104534	8:25666169	T	C	0.3011	0.0098	0.0017	4.05e-09
Leg fat percentage (left)	rs59227842	11:43692423	G	A	0.3124	0.0137	0.0017	1.04e-16
Leg fat percentage (left)	rs6001008	22:38505347	A	G	0.4278	0.0096	0.0016	9.57e-10
Leg fat percentage (left)	rs61888762	11:27709630	G	C	0.322	0.0163	0.0016	8.54e-24
Leg fat percentage (left)	rs62082914	18:39695195	A	G	0.0947	0.0144	0.0026	3.48e-08
Leg fat percentage (left)	rs62106258	2:417167	C	T	0.0485	-0.036	0.0035	2.42e-24
Leg fat percentage (left)	rs62178054	2:181574287	C	T	0.3719	-0.0103	0.0016	5.69e-11
Leg fat percentage (left)	rs62443626	7:39056649	A	G	0.4642	-0.0087	0.0015	1.42e-08
Leg fat percentage (left)	rs62454824	7:27498522	C	G	0.099	-0.0142	0.0026	2.54e-08
Leg fat percentage (left)	rs6561937	13:58257667	A	T	0.7518	-0.0135	0.0018	1.88e-14
Leg fat percentage (left)	rs6575340	14:94023972	A	G	0.6374	0.0114	0.0016	7.21e-13
Leg fat percentage (left)	rs6578412	11:1482582	C	T	0.9421	-0.0185	0.0033	1.79e-08
Leg fat percentage (left)	rs6674970	1:151116279	A	G	0.6974	-0.0095	0.0017	7.97e-09
Leg fat percentage (left)	rs6720868	2:230663576	T	C	0.3146	0.013	0.0016	2.37e-15
Leg fat percentage (left)	rs67257872	11:8530218	G	A	0.4438	-0.0106	0.0015	4.78e-12
Leg fat percentage (left)	rs6739755	2:59330227	G	A	0.603	-0.0109	0.0016	2.76e-12
Leg fat percentage (left)	rs6749422	2:25150011	G	C	0.4866	0.0198	0.0015	6.4e-39
Leg fat percentage (left)	rs6847975	4:80812960	A	G	0.356	0.0098	0.0016	8.21e-10
Leg fat percentage (left)	rs6861649	5:50864788	C	T	0.6075	0.0107	0.0016	7.18e-12
Leg fat percentage (left)	rs6888037	5:127406259	T	G	0.7517	0.0211	0.0018	5.15e-33
Leg fat percentage (left)	rs6898357	5:166986309	G	A	0.6805	-0.0097	0.0016	2.14e-09
Leg fat percentage (left)	rs691906	15:41474636	A	T	0.7344	-0.01	0.0017	5.91e-09
Leg fat percentage (left)	rs6925197	6:129517483	T	C	0.2138	-0.0105	0.0019	1.48e-08
Leg fat percentage (left)	rs696516	3:136067778	T	G	0.7349	0.0099	0.0017	9.53e-09
Leg fat percentage (left)	rs6973656	7:77422583	G	A	0.3966	0.0086	0.0016	2.79e-08
Leg fat percentage (left)	rs6992604	8:68274588	C	T	0.2906	0.0098	0.0017	4.65e-09
Leg fat percentage (left)	rs7000535	8:59804351	C	T	0.5043	-0.0089	0.0015	5e-09
Leg fat percentage (left)	rs7012637	8:9173209	A	G	0.4751	0.0091	0.0015	2.68e-09
Leg fat percentage (left)	rs704061	12:89771903	C	T	0.4527	0.0105	0.0015	7.11e-12
Leg fat percentage (left)	rs7117842	11:122534504	C	T	0.3699	0.011	0.0016	3.29e-12
Leg fat percentage (left)	rs7206608	16:82872628	G	C	0.3226	0.0101	0.0016	4.43e-10
Leg fat percentage (left)	rs7234938	18:13127442	T	C	0.3262	0.0095	0.0016	4.11e-09
Leg fat percentage (left)	rs7259070	19:47562509	C	T	0.599	0.0089	0.0016	1.46e-08
Leg fat percentage (left)	rs72677847	14:50844256	C	T	0.0354	-0.0232	0.0041	2.01e-08
Leg fat percentage (left)	rs73213484	4:28489339	T	A	0.1391	-0.0121	0.0022	3.28e-08
Leg fat percentage (left)	rs7463186	8:87517201	G	A	0.5161	0.0096	0.0015	3.18e-10
Leg fat percentage (left)	rs7498044	15:92573639	A	G	0.2187	-0.0102	0.0019	3.55e-08
Leg fat percentage (left)	rs750090	4:152931436	C	T	0.3562	-0.0089	0.0016	2.82e-08
Leg fat percentage (left)	rs75557510	3:84321469	G	A	0.0615	-0.0234	0.0032	4.17e-13
Leg fat percentage (left)	rs7591494	2:212278940	A	G	0.2614	0.0112	0.0017	1.2e-10
Leg fat percentage (left)	rs7600413	2:37067137	G	A	0.4414	-0.0093	0.0015	1.43e-09
Leg fat percentage (left)	rs76040172	21:46488959	A	G	0.0544	-0.0245	0.0034	3e-13
Leg fat percentage (left)	rs7707394	5:74472939	A	G	0.3543	-0.0111	0.0016	2.73e-12
Leg fat percentage (left)	rs7774	17:4801163	A	C	0.3091	0.0097	0.0017	4.99e-09
Leg fat percentage (left)	rs77991031	19:18862227	A	G	0.223	0.0104	0.0018	1.54e-08
Leg fat percentage (left)	rs7826830	8:95654628	T	C	0.1774	0.0116	0.002	8.08e-09
Leg fat percentage (left)	rs7893571	10:16750129	T	G	0.6634	0.0089	0.0016	3.56e-08
Leg fat percentage (left)	rs79113395	1:1590521	A	G	0.2654	-0.0115	0.0017	2.55e-11
Leg fat percentage (left)	rs7925100	11:118941596	A	G	0.3963	0.0097	0.0016	3.99e-10
Leg fat percentage (left)	rs79348488	15:80999240	G	A	0.2923	-0.0102	0.0017	9.74e-10
Leg fat percentage (left)	rs7966251	12:103731395	A	G	0.2523	-0.0101	0.0018	7.97e-09
Leg fat percentage (left)	rs7987928	13:54372377	A	G	0.7996	-0.0123	0.0019	8.68e-11
Leg fat percentage (left)	rs815163	1:190294726	C	T	0.5616	-0.0087	0.0015	1.13e-08
Leg fat percentage (left)	rs819168	20:32903845	G	T	0.9388	0.02	0.0032	2.92e-10
Leg fat percentage (left)	rs879620	16:4015729	T	C	0.6153	0.0121	0.0016	1.11e-14
Leg fat percentage (left)	rs896494	2:121484135	C	T	0.4598	-0.0089	0.0016	9.44e-09
Leg fat percentage (left)	rs9803921	1:209236818	A	C	0.3822	-0.0086	0.0016	3.39e-08
Leg fat percentage (left)	rs9834519	3:156379637	T	C	0.0815	-0.0157	0.0028	2.02e-08
Leg fat percentage (left)	rs9902386	17:21280185	G	T	0.6772	-0.0137	0.0016	8.33e-17
Leg fat percentage (left)	rs9906944	17:47091420	T	C	0.3391	-0.0109	0.0016	1.36e-11
Leg fat percentage (left)	rs9922436	16:24704490	C	G	0.7534	0.0105	0.0018	2.61e-09
smoking/smokers in household	rs10765003	10:132713479	C	T	0.5338	0.0037	0.0008	1.2e-06
smoking/smokers in household	rs112250420	11:78275112	A	T	0.0644	0.0073	0.0016	2.9e-06
smoking/smokers in household	rs11914502	3:114997384	C	T	0.6966	0.0039	0.0008	2e-06
smoking/smokers in household	rs143459797	20:62053213	T	A	0.0395	-0.0092	0.002	3.4e-06
smoking/smokers in household	rs17770881	2:119021935	C	T	0.0686	-0.0069	0.0015	4e-06
smoking/smokers in household	rs2236270	20:33523155	T	G	0.3826	-0.0037	0.0008	3.3e-06
smoking/smokers in household	rs2495030	1:13990291	C	T	0.7561	-0.0041	0.0009	4.4e-06
smoking/smokers in household	rs29746	5:31657098	C	T	0.8655	-0.0054	0.0011	2.2e-06
smoking/smokers in household	rs317029	4:35425352	T	G	0.7877	0.0044	0.0009	1.9e-06
smoking/smokers in household	rs58790794	15:78186007	G	A	0.0104	0.0174	0.0038	3.6e-06
smoking/smokers in household	rs60429130	3:39155574	G	A	0.0469	0.0087	0.0018	1.3e-06
smoking/smokers in household	rs62409640	4:45140329	A	C	0.1507	-0.0052	0.0011	8e-07
smoking/smokers in household	rs68110799	2:60945555	A	G	0.2685	-0.0041	0.0009	1.8e-06
smoking/smokers in household	rs7127595	11:9904122	G	A	0.0573	0.0085	0.0017	9.8e-07
smoking/smokers in household	rs73724776	6:18010768	G	A	0.0513	0.0082	0.0017	1.8e-06
smoking/smokers in household	rs76811145	4:63566245	C	T	0.0406	0.009	0.0019	3.6e-06
smoking/smokers in household	rs7875609	9:139060999	C	T	0.603	0.0038	0.0008	1.3e-06
smoking/smokers in household	rs8142893	22:43911166	A	T	0.2123	0.0044	0.0009	3e-06
smoking/smokers in household	rs9311834	3:62030849	A	C	0.8879	-0.0057	0.0012	2.8e-06
smoking/smokers in household	rs9964681	18:5471711	C	T	0.2872	0.0041	0.0008	9.7e-07
AFS	rs1000586	5:76938952	C	T	0.3562	-0.013	0.0023	1.2e-08
AFS	rs1004464	9:131003677	G	A	0.1547	-0.014	0.003	2.4e-06
AFS	rs10085776	7:104441909	C	T	0.5655	-0.0137	0.0022	3e-10
AFS	rs10104523	8:73889570	C	T	0.5224	-0.0126	0.0022	6.3e-09
AFS	rs10137475	14:58797953	A	G	0.5773	0.0133	0.0022	1.1e-09
AFS	rs1015438	16:51177517	A	G	0.188	-0.0136	0.0028	8.1e-07
AFS	rs10178156	2:236718109	G	A	0.5995	-0.0107	0.0022	1.1e-06
AFS	rs10204104	2:174209822	A	C	0.8319	-0.0164	0.0029	1.5e-08
AFS	rs10231828	7:133348337	G	T	0.4469	-0.014	0.0022	1e-10
AFS	rs10283917	9:81502485	G	A	0.4084	0.011	0.0022	5.4e-07
AFS	rs10459597	15:61181431	T	C	0.2396	-0.0119	0.0026	4.1e-06
AFS	rs10496949	2:144153344	C	G	0.578	0.0149	0.0022	8.2e-12
AFS	rs10513179	5:14424672	G	C	0.6101	-0.0105	0.0022	1.9e-06
AFS	rs10514231	5:81307412	T	C	0.6416	0.0122	0.0022	6.4e-08
AFS	rs10516875	4:91590266	G	T	0.2339	-0.0131	0.0026	3e-07
AFS	rs10755688	6:35955833	G	A	0.6071	0.0111	0.0022	5e-07
AFS	rs10768657	11:41016513	T	C	0.4355	0.0106	0.0022	1.1e-06
AFS	rs10863258	1:216778925	G	A	0.5557	0.0114	0.0022	1.7e-07
AFS	rs10865398	2:73741497	T	G	0.3722	-0.0103	0.0022	3.5e-06
AFS	rs10880088	12:41905897	T	C	0.2161	0.0162	0.0026	8e-10
AFS	rs10922326	1:197867662	G	T	0.1605	0.0142	0.003	1.8e-06
AFS	rs10956838	8:93404442	C	A	0.2736	0.0117	0.0024	1.5e-06
AFS	rs10994777	10:63233988	A	G	0.1619	0.0188	0.0029	1.4e-10
AFS	rs11098400	4:118586255	G	A	0.1683	0.0142	0.0029	8.5e-07
AFS	rs11188601	10:97856899	C	T	0.3647	-0.0172	0.0022	1.6e-14
AFS	rs11198323	10:120008097	A	G	0.1678	0.0162	0.0029	2.2e-08
AFS	rs11206276	1:40001247	C	T	0.1854	0.014	0.0028	5.5e-07
AFS	rs1121908	10:34589054	C	T	0.6216	-0.0105	0.0022	2.2e-06
AFS	rs112633616	12:23238326	C	A	0.0333	0.0403	0.0061	3.1e-11
AFS	rs113254489	14:81930396	A	G	0.0377	-0.0282	0.0057	7.3e-07
AFS	rs113338260	5:46004640	C	T	0.2157	-0.0156	0.0026	2.5e-09
AFS	rs113367286	7:140144414	T	C	0.2782	0.0198	0.0024	2e-16
AFS	rs113989462	3:10160922	G	C	0.0179	-0.0406	0.0082	6.3e-07
AFS	rs115024193	4:79714654	A	T	0.0349	0.0298	0.0059	4.5e-07
AFS	rs1156981	1:88829969	G	A	0.9016	-0.0228	0.0036	2.9e-10
AFS	rs115882849	3:54156724	A	G	0.153	-0.0192	0.003	1.7e-10
AFS	rs116701540	4:98878903	A	G	0.1327	0.0149	0.0032	3.4e-06
AFS	rs11678980	2:162101261	A	G	0.4611	-0.0124	0.0022	2.9e-08
AFS	rs116885450	14:38057559	T	C	0.0486	-0.0275	0.0051	7.7e-08
AFS	rs117236391	18:40505274	A	G	0.0223	0.0364	0.0075	1.3e-06
AFS	rs117528546	7:121942849	G	A	0.0383	-0.027	0.0056	1.6e-06
AFS	rs11770163	7:116417848	C	G	0.3316	-0.013	0.0023	1.4e-08
AFS	rs11775886	8:142214381	G	A	0.4928	-0.0113	0.0022	1.8e-07
AFS	rs117831144	20:14731057	T	C	0.0292	-0.0344	0.0067	3.5e-07
AFS	rs11837546	12:96614816	T	C	0.5794	0.0102	0.0022	3.2e-06
AFS	rs11859355	16:13580639	A	G	0.3507	0.0108	0.0023	2e-06
AFS	rs11870866	17:66281117	T	G	0.3642	0.0105	0.0023	3.4e-06
AFS	rs11959256	5:112018894	G	A	0.1804	0.0144	0.0028	2.6e-07
AFS	rs12147463	14:41059928	A	G	0.1934	-0.0209	0.0028	3.9e-14
AFS	rs12204714	6:152235339	T	C	0.6321	0.0293	0.0022	4.3e-39
AFS	rs12204839	6:89512208	T	C	0.313	0.0108	0.0023	3.5e-06
AFS	rs1226414	2:157109930	T	A	0.5051	0.0155	0.0022	6e-13
AFS	rs12365311	11:1649887	G	C	0.0814	0.0185	0.0039	2.7e-06
AFS	rs12401854	1:156217401	T	C	0.1514	-0.0143	0.003	2.2e-06
AFS	rs12425997	12:195335	C	T	0.555	-0.0107	0.0022	8.3e-07
AFS	rs12448731	16:49622284	T	C	0.1417	-0.0175	0.0031	1.9e-08
AFS	rs1247755	10:78797670	G	C	0.6636	0.0117	0.0023	2.8e-07
AFS	rs12511982	4:60736871	A	G	0.5505	0.0127	0.0022	5.9e-09
AFS	rs12523097	5:167411400	C	T	0.2977	-0.0161	0.0024	1.1e-11
AFS	rs12523398	5:45119647	A	T	0.1739	0.0225	0.0029	3e-15
AFS	rs12616800	2:123754078	C	T	0.2953	0.0122	0.0024	2.5e-07
AFS	rs12651232	4:47274736	T	A	0.1476	0.0144	0.0031	2.4e-06
AFS	rs12671608	7:153524115	C	T	0.1391	-0.0175	0.0031	2.2e-08
AFS	rs12671762	7:158109278	T	G	0.3441	0.0118	0.0023	2.1e-07
AFS	rs12725944	1:232569889	A	G	0.225	0.0125	0.0026	1.2e-06
AFS	rs12735232	1:6867842	C	T	0.1577	0.0136	0.003	4.2e-06
AFS	rs12763937	10:87503021	A	C	0.1339	-0.0147	0.0032	3.9e-06
AFS	rs12795483	11:79883503	G	A	0.5181	0.013	0.0022	2.2e-09
AFS	rs12826060	12:24195419	G	T	0.4125	-0.0131	0.0022	2.5e-09
AFS	rs12886621	14:29644348	G	T	0.1336	0.0151	0.0032	2.2e-06
AFS	rs12929211	16:12471983	C	T	0.511	0.0107	0.0022	8.3e-07
AFS	rs1295220	5:154890837	T	C	0.2535	-0.0186	0.0025	6.7e-14
AFS	rs13009008	2:174043233	G	A	0.6723	0.0183	0.0023	1.6e-15
AFS	rs13010628	2:61518474	T	G	0.2182	0.0148	0.0026	1.6e-08
AFS	rs13034349	2:98329197	T	C	0.4074	-0.0103	0.0022	3.2e-06
AFS	rs1314114	6:14719243	T	C	0.8199	-0.0134	0.0028	1.8e-06
AFS	rs13175535	5:31078814	A	G	0.2951	0.0129	0.0024	7.4e-08
AFS	rs13193757	6:37478671	G	T	0.2322	-0.0119	0.0026	3.4e-06
AFS	rs13343173	11:93222087	A	G	0.1661	0.0136	0.0029	2.7e-06
AFS	rs1364960	8:64876494	G	C	0.3319	-0.0109	0.0023	2.4e-06
AFS	rs138901895	12:131711846	T	C	0.0133	0.0461	0.0101	4.8e-06
AFS	rs1391075	12:84052203	C	A	0.6434	-0.0154	0.0023	8.5e-12
AFS	rs139361471	11:85399069	T	C	0.0444	0.0275	0.0053	1.8e-07
AFS	rs140098	22:30126644	C	T	0.5478	-0.0124	0.0022	1.5e-08
AFS	rs1424203	16:60798217	T	C	0.3601	-0.0111	0.0023	9.2e-07
AFS	rs143318463	13:38131675	A	G	0.1321	0.016	0.0032	5.7e-07
AFS	rs144882360	13:112753607	G	A	0.0185	0.0394	0.0083	2.1e-06
AFS	rs1456213	3:66991758	A	T	0.5079	0.0106	0.0022	9e-07
AFS	rs1585634	8:54396376	C	G	0.8021	-0.0156	0.0027	1e-08
AFS	rs159428	20:31099311	C	T	0.5265	-0.0133	0.0022	7.2e-10
AFS	rs1609598	20:51510926	T	C	0.3518	-0.0121	0.0023	1.4e-07
AFS	rs1626703	12:123710835	C	A	0.7443	-0.0124	0.0025	5.9e-07
AFS	rs16898480	5:68389714	G	A	0.1664	-0.014	0.003	2.5e-06
AFS	rs17019568	4:93479889	G	C	0.1091	-0.0168	0.0035	1.1e-06
AFS	rs17164088	4:2675893	G	A	0.4221	-0.0124	0.0022	1.4e-08
AFS	rs17201341	3:21504006	G	A	0.2744	0.0132	0.0025	7.3e-08
AFS	rs17289915	4:104491078	G	C	0.0122	0.0496	0.0098	4.2e-07
AFS	rs17404223	2:14513989	C	T	0.4364	-0.0112	0.0022	2.8e-07
AFS	rs1760870	13:68013501	A	C	0.6277	-0.0105	0.0022	2.5e-06
AFS	rs1780195	10:27008703	G	A	0.4977	0.0112	0.0022	2.3e-07
AFS	rs1794313	16:12638031	G	C	0.1782	0.0159	0.0028	1.8e-08
AFS	rs182353	8:115396892	T	C	0.4681	-0.013	0.0022	1.7e-09
AFS	rs1881708	3:25645514	A	G	0.3009	0.012	0.0024	3.7e-07
AFS	rs1925686	6:87858691	A	G	0.3896	0.0114	0.0022	2.7e-07
AFS	rs1944080	11:95503636	C	T	0.3839	0.0103	0.0022	3.3e-06
AFS	rs1995955	18:76536239	A	G	0.2564	0.0126	0.0025	3.4e-07
AFS	rs200561	1:168822447	G	A	0.2566	-0.0114	0.0025	3.7e-06
AFS	rs2046443	3:84687093	G	T	0.1908	-0.0135	0.0027	9.1e-07
AFS	rs206005	6:164427025	T	A	0.7602	-0.0144	0.0025	1.2e-08
AFS	rs2084572	3:17315758	G	A	0.4502	0.0147	0.0022	1e-11
AFS	rs2093623	10:10922977	A	G	0.4963	0.015	0.0022	5.5e-12
AFS	rs2130893	10:134039132	C	G	0.2854	0.0149	0.0025	1.5e-09
AFS	rs2131183	8:18664444	C	G	0.5526	0.0102	0.0022	3.1e-06
AFS	rs2149103	9:14538445	T	C	0.0833	-0.019	0.0039	1.3e-06
AFS	rs2167724	15:70188673	C	T	0.2209	0.0135	0.0026	2.1e-07
AFS	rs2174752	13:69332015	T	G	0.4512	-0.0143	0.0022	3.9e-11
AFS	rs2176337	9:108959330	T	A	0.3153	-0.0178	0.0023	1.9e-14
AFS	rs2211068	6:145312895	C	T	0.1057	-0.0184	0.0035	1.8e-07
AFS	rs2218439	8:93202128	G	A	0.5769	0.0116	0.0022	1e-07
AFS	rs2269625	20:42167236	T	C	0.7192	0.0124	0.0024	2.5e-07
AFS	rs2274568	1:110612925	A	G	0.5807	-0.0138	0.0022	3e-10
AFS	rs228614	4:103578637	A	G	0.4651	-0.0111	0.0022	2.6e-07
AFS	rs2360749	19:10669444	C	A	0.6723	0.0115	0.0023	6e-07
AFS	rs2382440	9:14140575	C	G	0.1559	-0.0173	0.003	6.3e-09
AFS	rs2406374	5:106936435	T	C	0.314	0.0148	0.0023	1.9e-10
AFS	rs248639	5:141103586	T	C	0.173	-0.0132	0.0029	3.4e-06
AFS	rs2495887	6:48738780	G	A	0.54	-0.01	0.0022	4.1e-06
AFS	rs2535593	17:5621920	C	T	0.4602	0.0125	0.0022	8.3e-09
AFS	rs2552134	8:3933252	T	G	0.2645	0.0114	0.0025	3.5e-06
AFS	rs2553041	2:63238346	C	G	0.1962	0.0203	0.0027	1e-13
AFS	rs2581761	4:176641467	G	A	0.5556	0.0105	0.0022	1.4e-06
AFS	rs2613765	19:5066330	A	G	0.4734	0.0126	0.0022	6.5e-09
AFS	rs2625223	1:204903874	T	C	0.4817	0.0125	0.0022	1e-08
AFS	rs2644156	1:227677791	G	C	0.2924	0.0116	0.0024	9.6e-07
AFS	rs2661876	7:49874533	C	A	0.3907	0.0105	0.0022	1.8e-06
AFS	rs2740789	8:91950222	T	G	0.417	-0.0102	0.0022	3.4e-06
AFS	rs2744023	6:19195750	C	G	0.6743	0.0114	0.0023	8.5e-07
AFS	rs2744450	6:52951766	G	A	0.8021	0.0171	0.0027	2.8e-10
AFS	rs2803851	1:235500649	T	C	0.6288	-0.0103	0.0022	3.9e-06
AFS	rs28373886	15:87425752	A	C	0.1862	-0.0132	0.0028	2e-06
AFS	rs28482269	9:140248605	A	C	0.147	-0.0161	0.003	1.3e-07
AFS	rs28649868	4:137484428	C	T	0.3061	-0.0112	0.0024	2e-06
AFS	rs28675192	15:98543839	A	C	0.8188	0.013	0.0028	3.3e-06
AFS	rs293736	20:31925189	C	A	0.7222	-0.0141	0.0024	5.7e-09
AFS	rs2974311	8:42455166	A	G	0.4975	0.0138	0.0022	1.4e-10
AFS	rs298247	2:157233542	C	G	0.1675	0.0163	0.0029	1.5e-08
AFS	rs3008495	14:84901051	A	G	0.524	-0.0118	0.0022	6.9e-08
AFS	rs318947	11:131435183	C	T	0.56	-0.0108	0.0022	6.2e-07
AFS	rs328466	11:25982048	C	T	0.2405	0.0122	0.0025	1.3e-06
AFS	rs34003787	16:73071381	T	C	0.0876	0.0207	0.0039	9.2e-08
AFS	rs341521	13:60399045	A	G	0.7028	-0.0153	0.0024	1.1e-10
AFS	rs34567022	2:173091583	C	T	0.2726	-0.0109	0.0024	4e-06
AFS	rs34606772	3:24908376	T	C	0.4163	-0.0128	0.0022	6.4e-09
AFS	rs34759533	1:208440450	C	G	0.4034	0.0105	0.0022	1.9e-06
AFS	rs34999134	5:94751133	G	A	0.2998	-0.0115	0.0024	1e-06
AFS	rs35128508	18:42722340	A	G	0.2734	0.0147	0.0024	1.3e-09
AFS	rs35177116	4:19339780	T	C	0.2762	-0.0124	0.0024	2.7e-07
AFS	rs35353184	3:60885478	G	A	0.2666	-0.0136	0.0024	2.2e-08
AFS	rs35408390	2:86471782	T	C	0.4428	-0.0121	0.0022	2.2e-08
AFS	rs35545133	5:135678363	G	C	0.1375	0.0155	0.0031	7e-07
AFS	rs35587552	7:100821542	G	A	0.1665	-0.015	0.0029	2.2e-07
AFS	rs35593853	7:94300853	G	A	0.1253	0.0156	0.0033	1.9e-06
AFS	rs35851551	7:31330785	G	A	0.1014	-0.0265	0.0036	2.1e-13
AFS	rs369230	16:89645437	T	G	0.6924	-0.0185	0.0024	3.9e-15
AFS	rs3739121	2:201171014	C	G	0.4271	-0.0123	0.0022	1.7e-08
AFS	rs3758790	11:105850090	G	A	0.3594	0.0154	0.0023	8.9e-12
AFS	rs3789045	1:204586812	T	C	0.209	0.015	0.0026	1.5e-08
AFS	rs3820277	1:18436657	T	G	0.5243	0.0112	0.0022	2.4e-07
AFS	rs3928672	8:141572167	T	C	0.2361	-0.0134	0.0026	3.2e-07
AFS	rs3998531	10:73340767	T	C	0.3953	-0.012	0.0022	6e-08
AFS	rs410825	7:101892121	A	G	0.448	0.0118	0.0022	6.6e-08
AFS	rs412035	21:44031933	G	A	0.1949	-0.0129	0.0027	2.3e-06
AFS	rs42278	5:11345193	A	G	0.0434	-0.0255	0.0053	1.3e-06
AFS	rs431414	15:59147800	T	C	0.1827	0.0136	0.0028	1.5e-06
AFS	rs4338718	14:27543866	T	C	0.4399	0.0106	0.0022	1.1e-06
AFS	rs4344124	9:3145998	C	T	0.3813	0.0117	0.0022	1.3e-07
AFS	rs4443996	10:134191005	C	A	0.4765	-0.0167	0.0022	1.1e-14
AFS	rs4454937	15:88391880	T	C	0.6363	-0.0107	0.0023	2.7e-06
AFS	rs4602427	3:117474457	G	C	0.8039	-0.0162	0.0027	2.5e-09
AFS	rs4652137	1:175848239	C	T	0.4024	-0.0104	0.0022	2.6e-06
AFS	rs4702	15:91426560	A	G	0.5564	0.0167	0.0022	1.3e-14
AFS	rs4714104	6:37746668	T	G	0.4475	-0.0116	0.0022	1.2e-07
AFS	rs4727799	7:114110568	T	C	0.6473	-0.0208	0.0023	2.8e-20
AFS	rs4735438	8:97829917	T	C	0.587	-0.0145	0.0022	3.9e-11
AFS	rs4739488	8:37200640	T	C	0.6195	-0.0103	0.0022	3.6e-06
AFS	rs4745124	9:74397055	T	A	0.5718	-0.0114	0.0022	3.4e-07
AFS	rs4800204	18:22647270	T	C	0.5703	-0.0128	0.0022	4.6e-09
AFS	rs4805761	19:32951800	G	A	0.8433	0.0165	0.003	2.6e-08
AFS	rs4808135	19:18615270	G	C	0.2162	-0.0135	0.0026	2.9e-07
AFS	rs4873133	8:51127054	T	C	0.2924	-0.0181	0.0024	2.5e-14
AFS	rs4952343	2:32858637	G	A	0.4464	0.0138	0.0022	3e-10
AFS	rs4961705	9:16347927	C	G	0.348	0.0135	0.0023	5e-09
AFS	rs55659265	2:142247852	A	G	0.0666	-0.0244	0.0043	1.5e-08
AFS	rs56306056	2:184416610	A	G	0.2147	0.0161	0.0026	8.6e-10
AFS	rs56392241	3:131968209	C	A	0.3932	-0.0136	0.0022	8.6e-10
AFS	rs56393977	18:39265197	T	G	0.1025	0.0224	0.0036	3.6e-10
AFS	rs5765732	22:44922761	G	A	0.4851	-0.0103	0.0022	2.1e-06
AFS	rs58087806	7:1299537	C	G	0.1064	0.0189	0.0035	5.9e-08
AFS	rs6011138	20:62440700	C	T	0.1359	0.0189	0.0032	2.3e-09
AFS	rs6028085	20:59838217	T	C	0.7378	0.0116	0.0025	2.8e-06
AFS	rs603061	11:61018328	C	A	0.161	0.0153	0.003	2.8e-07
AFS	rs61789085	1:98443881	G	A	0.2778	0.0121	0.0024	5.1e-07
AFS	rs61810981	1:114887238	A	G	0.112	-0.0184	0.0035	1.1e-07
AFS	rs61939786	12:119395025	T	C	0.1143	-0.0184	0.0034	9.6e-08
AFS	rs62109878	19:13105333	C	G	0.4082	0.0102	0.0022	3.8e-06
AFS	rs62134195	2:45062249	T	C	0.041	0.034	0.0055	6.9e-10
AFS	rs62157532	2:113276770	T	G	0.1622	0.015	0.0029	2.8e-07
AFS	rs62175960	2:161326360	A	G	0.0342	0.0314	0.0059	1.2e-07
AFS	rs62439690	7:21417556	A	G	0.2624	-0.0162	0.0025	6.3e-11
AFS	rs62499843	8:53246838	A	G	0.1514	-0.0165	0.0031	7.8e-08
AFS	rs62643414	22:44730714	A	G	0.6766	-0.0117	0.0024	9.5e-07
AFS	rs642803	11:65560620	T	C	0.465	0.0115	0.0022	1.2e-07
AFS	rs6486065	11:12870969	G	T	0.709	0.0162	0.0024	1e-11
AFS	rs6517512	21:40512129	G	A	0.9556	-0.0295	0.0052	1.8e-08
AFS	rs6549670	3:74936132	G	A	0.8387	-0.0183	0.0029	4.7e-10
AFS	rs6564268	16:75606878	G	C	0.0561	0.0284	0.0047	1.5e-09
AFS	rs6586405	1:234739101	A	C	0.327	-0.0131	0.0023	1.5e-08
AFS	rs6587619	1:151776214	G	A	0.4742	0.0123	0.0022	1.5e-08
AFS	rs6668959	1:174057626	T	C	0.4517	0.0116	0.0022	9.2e-08
AFS	rs6719762	2:60166832	C	T	0.4733	-0.0234	0.0022	3.2e-27
AFS	rs6732310	2:58210239	C	T	0.61	0.0102	0.0022	4.4e-06
AFS	rs67432432	13:36699690	G	A	0.2343	0.0121	0.0026	2.5e-06
AFS	rs6748341	2:225377574	G	C	0.3163	0.0168	0.0023	5.4e-13
AFS	rs67730760	8:14004596	C	T	0.2826	-0.0118	0.0024	8.7e-07
AFS	rs6790065	3:181464694	C	T	0.721	-0.0133	0.0025	1.4e-07
AFS	rs6851366	4:154668429	C	T	0.5017	0.0105	0.0022	1e-06
AFS	rs6921272	6:99546454	T	A	0.0754	0.0221	0.0041	7.2e-08
AFS	rs6939048	6:26327953	A	G	0.6273	0.0144	0.0022	1.3e-10
AFS	rs6955073	7:118298293	A	T	0.5084	0.0124	0.0022	9.8e-09
AFS	rs6966898	7:135221170	T	C	0.333	-0.0139	0.0023	1.6e-09
AFS	rs6978112	7:1966841	T	C	0.4115	-0.0171	0.0022	7.4e-15
AFS	rs7008955	8:26334103	G	T	0.5267	0.0118	0.0022	5.5e-08
AFS	rs702	4:28710551	T	A	0.8386	0.0205	0.0029	2.6e-12
AFS	rs7025089	9:134881443	A	C	0.6806	0.0161	0.0023	3.6e-12
AFS	rs705240	3:118457615	T	C	0.1842	-0.0161	0.0028	7e-09
AFS	rs710289	14:98535256	G	A	0.416	-0.016	0.0022	3.2e-13
AFS	rs71433405	13:97130945	T	C	0.066	0.0261	0.0044	3e-09
AFS	rs714393	2:212698718	T	C	0.4568	0.0142	0.0022	6.1e-11
AFS	rs7178603	15:70447399	C	T	0.5446	-0.0104	0.0022	1.7e-06
AFS	rs7207255	17:27384998	G	A	0.3499	-0.0123	0.0023	6.8e-08
AFS	rs7236339	18:77579773	A	G	0.2275	-0.0205	0.0026	2.5e-15
AFS	rs72655525	4:77077668	A	C	0.0849	-0.0201	0.0039	2.3e-07
AFS	rs72700768	9:12509407	C	T	0.1692	0.0141	0.0029	9.7e-07
AFS	rs7278921	21:18438797	T	C	0.2761	0.0128	0.0024	1.3e-07
AFS	rs72822625	5:167757575	A	G	0.0946	0.0215	0.0037	5.5e-09
AFS	rs72996415	6:105265993	C	T	0.0647	0.0255	0.0045	1.5e-08
AFS	rs7305821	12:121071743	G	A	0.5985	-0.0108	0.0022	9.1e-07
AFS	rs73163896	7:157519773	G	A	0.0275	0.0317	0.0066	1.5e-06
AFS	rs73164190	3:161200099	C	T	0.1054	0.0167	0.0035	1.9e-06
AFS	rs73564822	16:60379173	G	T	0.0518	0.0231	0.0049	2.4e-06
AFS	rs7381195	5:60030791	A	T	0.612	-0.0146	0.0022	3.8e-11
AFS	rs74378346	4:43188465	C	T	0.0444	0.0253	0.0053	1.8e-06
AFS	rs74470546	3:114162343	G	C	0.0667	0.0208	0.0045	3e-06
AFS	rs74583305	8:143419130	T	C	0.0204	0.0438	0.0077	1.1e-08
AFS	rs74675246	7:70195619	A	G	0.0929	0.0177	0.0037	2e-06
AFS	rs7476	11:46342834	C	A	0.3122	-0.0139	0.0023	2.6e-09
AFS	rs75013923	3:165859264	A	G	0.0719	-0.0207	0.0042	8.4e-07
AFS	rs75082770	2:185915324	G	A	0.0377	-0.0352	0.0057	6.3e-10
AFS	rs75182167	1:58487707	G	A	0.0485	0.0268	0.005	9e-08
AFS	rs75783371	13:28109961	C	T	0.1393	0.0187	0.0032	3.2e-09
AFS	rs7589439	2:1930427	C	T	0.1402	-0.0156	0.0031	4.8e-07
AFS	rs7639609	3:115880729	T	C	0.2707	-0.0117	0.0024	1.5e-06
AFS	rs76513770	16:72505534	C	T	0.1277	0.0256	0.0032	2.4e-15
AFS	rs7660712	4:189728235	T	G	0.9374	0.0205	0.0044	3.9e-06
AFS	rs767943	6:23446691	A	C	0.2649	-0.0186	0.0025	3.6e-14
AFS	rs7704530	5:30845465	A	G	0.7318	-0.0132	0.0024	6.3e-08
AFS	rs7710699	5:13738773	A	G	0.3898	0.0119	0.0023	1.2e-07
AFS	rs7715167	5:170778824	C	T	0.6105	0.0111	0.0022	5.2e-07
AFS	rs77165503	11:79130394	T	C	0.1154	0.0183	0.0034	6.2e-08
AFS	rs7729019	5:155844242	T	C	0.6136	0.0126	0.0022	1.1e-08
AFS	rs77557265	12:73533030	C	G	0.0388	-0.0286	0.0056	3.1e-07
AFS	rs7763983	6:100249106	G	T	0.2445	-0.0121	0.0025	1.4e-06
AFS	rs780026	2:125026256	C	T	0.4609	-0.0109	0.0022	5e-07
AFS	rs783544	15:83240293	C	A	0.7506	0.0165	0.0025	4e-11
AFS	rs784255	18:53403228	T	G	0.4755	-0.0143	0.0022	4.4e-11
AFS	rs78540972	4:129854259	C	A	0.0922	-0.0187	0.0037	6.1e-07
AFS	rs7857266	9:96381765	T	C	0.3952	0.0131	0.0022	3.7e-09
AFS	rs7868984	9:23357826	C	T	0.4159	0.0138	0.0022	2.7e-10
AFS	rs7909331	10:11205224	G	A	0.1645	-0.0167	0.0029	9.2e-09
AFS	rs7911962	10:9968483	T	C	0.3844	0.0136	0.0022	1.1e-09
AFS	rs79231171	2:213841704	A	C	0.0771	0.0224	0.004	2.7e-08
AFS	rs79269403	3:108036819	A	G	0.2309	0.0202	0.0026	3.5e-15
AFS	rs7930865	11:77724674	T	C	0.2796	-0.0125	0.0024	1.9e-07
AFS	rs7953499	12:27222237	A	C	0.3419	0.012	0.0023	1.4e-07
AFS	rs7956371	12:24568402	G	A	0.2085	0.0136	0.0027	5e-07
AFS	rs7958753	12:60952982	G	T	0.3938	-0.0109	0.0022	8.4e-07
AFS	rs7965658	12:49987929	A	G	0.1964	0.0145	0.0027	8.6e-08
AFS	rs79674935	21:17763123	A	G	0.0836	0.0185	0.0039	2.3e-06
AFS	rs7984311	13:100741752	A	G	0.3653	-0.0105	0.0023	3e-06
AFS	rs803679	1:44349405	A	G	0.7926	0.0197	0.0027	1.1e-13
AFS	rs8061900	16:78256680	A	G	0.5176	-0.0112	0.0022	2.3e-07
AFS	rs807478	19:36252494	G	A	0.4972	0.0142	0.0022	4.6e-11
AFS	rs8075802	17:35943220	T	C	0.6317	0.0103	0.0022	4.4e-06
AFS	rs8096225	18:36921851	C	A	0.6948	-0.0132	0.0023	1.8e-08
AFS	rs8133065	21:31422507	G	C	0.2833	0.0139	0.0024	8.6e-09
AFS	rs838042	2:140320186	A	G	0.6872	0.0149	0.0023	1.5e-10
AFS	rs870817	11:126454688	G	A	0.3771	0.0111	0.0023	9.1e-07
AFS	rs9289748	3:147137976	G	T	0.3671	0.0112	0.0022	5.5e-07
AFS	rs9290646	3:178176128	G	A	0.6038	0.0107	0.0022	1.7e-06
AFS	rs930457	4:143785362	C	T	0.3572	0.0114	0.0023	4.8e-07
AFS	rs9387367	6:116121358	A	C	0.6415	-0.0111	0.0023	8.4e-07
AFS	rs9470670	6:11988081	G	T	0.1539	-0.0152	0.003	3.3e-07
AFS	rs9491228	6:125061384	C	T	0.5289	-0.0141	0.0022	6.7e-11
AFS	rs9492172	6:129301577	T	C	0.0998	0.019	0.0036	1.5e-07
AFS	rs9514600	13:107644422	G	C	0.5021	-0.0119	0.0022	3.4e-08
AFS	rs9536961	13:55678332	G	A	0.3482	0.0131	0.0023	1.2e-08
AFS	rs9538248	13:59492828	A	C	0.3209	-0.0156	0.0023	1.3e-11
AFS	rs9809849	3:3726156	A	G	0.4252	-0.0142	0.0022	8.7e-11
AFS	rs9847902	3:189218186	G	C	0.0539	-0.0238	0.0048	5.7e-07
AFS	rs9877722	3:135635468	C	G	0.3305	-0.0112	0.0023	9.2e-07
AFS	rs9894946	17:7571080	G	A	0.841	0.0151	0.003	4.6e-07
AFS	rs9901521	17:79098152	C	T	0.0658	0.0207	0.0044	2.6e-06
AFS	rs9904818	17:77793292	C	G	0.0902	0.0223	0.0038	3.3e-09
AFS	rs9923553	16:5825579	G	A	0.2901	-0.0143	0.0024	1.7e-09
AFS	rs9993397	4:62952239	G	A	0.6942	0.0125	0.0023	1e-07
AFB	rs10010561	4:47283597	A	G	NA	0.0485	0.0099	8.74e-07
AFB	rs10194284	2:124066877	C	G	NA	0.0528	0.01	1.28e-07
AFB	rs10445366	17:43932797	C	G	NA	-0.0886	0.0136	6.69e-11
AFB	rs1044798	10:32094751	C	T	NA	0.0569	0.011	2.44e-07
AFB	rs10476374	5:155817679	G	T	NA	0.049	0.0095	2.4e-07
AFB	rs10498011	2:215201307	C	T	NA	0.062	0.013	1.84e-06
AFB	rs10745789	12:97676616	T	C	NA	-0.0442	0.0092	1.57e-06
AFB	rs10752613	1:153760104	A	T	NA	-0.0715	0.0102	1.89e-12
AFB	rs10786831	10:106614571	G	A	NA	0.0519	0.0092	1.68e-08
AFB	rs10852028	15:38942641	C	T	NA	-0.0437	0.0092	2.22e-06
AFB	rs10890996	11:109328421	T	C	NA	-0.0519	0.0098	1.33e-07
AFB	rs10941692	5:45099778	C	T	NA	0.0702	0.0114	8.84e-10
AFB	rs11123170	2:113978940	G	C	NA	0.0507	0.0095	9.71e-08
AFB	rs11155364	6:144952491	A	C	NA	-0.0732	0.0144	3.56e-07
AFB	rs11242222	5:133875033	G	A	NA	0.0686	0.0122	1.67e-08
AFB	rs1124487	10:21109952	T	C	NA	0.0537	0.0102	1.28e-07
AFB	rs112512729	3:24905460	G	T	NA	0.0965	0.0175	3.5e-08
AFB	rs113247159	7:140182514	C	T	NA	0.0641	0.0115	2.68e-08
AFB	rs11622992	14:75019157	C	T	NA	-0.05	0.0096	1.67e-07
AFB	rs11664222	18:38976614	G	A	NA	-0.0984	0.0208	2.24e-06
AFB	rs11715034	3:51409600	C	T	NA	-0.0479	0.0098	9.52e-07
AFB	rs11736215	4:7762502	C	A	NA	0.0461	0.0091	3.85e-07
AFB	rs11774212	8:145686505	T	C	NA	0.0551	0.0096	1.08e-08
AFB	rs11887646	2:5891511	G	A	NA	0.0707	0.0112	2.25e-10
AFB	rs11915934	3:74883069	G	A	NA	-0.073	0.0122	2.25e-09
AFB	rs12016	19:19102590	T	A	NA	0.0515	0.0103	5.83e-07
AFB	rs12368427	12:5291651	A	G	NA	-0.0657	0.0144	4.68e-06
AFB	rs12412923	10:60981954	G	A	NA	0.0731	0.0134	5.35e-08
AFB	rs12474734	2:61530290	T	C	NA	-0.0686	0.0133	2.54e-07
AFB	rs12620002	2:48734773	C	T	NA	-0.0446	0.0093	1.61e-06
AFB	rs12752795	1:208450646	T	C	NA	0.0529	0.01	1.39e-07
AFB	rs12815613	12:121407256	G	A	NA	0.0564	0.0097	5.75e-09
AFB	rs12956003	18:77725655	G	A	NA	-0.0658	0.0139	2.36e-06
AFB	rs13004388	2:125004105	T	C	NA	0.0511	0.0103	6.49e-07
AFB	rs13009008	2:174043233	G	A	NA	0.0531	0.0101	1.42e-07
AFB	rs1303842	16:59334235	A	T	NA	-0.0496	0.0095	2e-07
AFB	rs1314114	6:14719243	T	C	NA	-0.0575	0.0126	4.72e-06
AFB	rs13326242	3:1187861	T	C	NA	-0.1027	0.0221	3.35e-06
AFB	rs13413037	2:104181649	G	A	NA	-0.0577	0.0097	2.3e-09
AFB	rs139728494	18:52610263	A	G	NA	-0.1845	0.0393	2.7e-06
AFB	rs1425074	7:136800071	T	A	NA	0.0474	0.0093	3.53e-07
AFB	rs1425453	4:60694591	G	A	NA	0.0448	0.0092	1.04e-06
AFB	rs1430901	3:17966157	G	A	NA	0.0562	0.0093	1.33e-09
AFB	rs1445979	5:60744339	A	T	NA	-0.0464	0.0093	6.04e-07
AFB	rs1464534	7:3505092	G	C	NA	0.0606	0.0099	1e-09
AFB	rs150346963	7:117625599	T	C	NA	-0.0518	0.0101	2.62e-07
AFB	rs1511018	4:120161580	T	G	NA	-0.0462	0.0096	1.6e-06
AFB	rs1559622	2:60130648	T	C	NA	-0.0499	0.0096	1.73e-07
AFB	rs1637746	7:2233871	A	G	NA	-0.0542	0.0111	1.05e-06
AFB	rs16847952	2:142787223	G	A	NA	0.0439	0.0092	1.87e-06
AFB	rs16848587	2:164396272	G	C	NA	0.0773	0.0164	2.52e-06
AFB	rs17227139	21:36330465	C	T	NA	0.1712	0.0367	3.03e-06
AFB	rs17348586	4:129805156	G	A	NA	-0.0796	0.0157	3.6e-07
AFB	rs176223	14:29604585	C	T	NA	0.0721	0.0136	1.1e-07
AFB	rs17731405	7:49854560	G	A	NA	-0.0735	0.0129	1.21e-08
AFB	rs17770211	2:211295019	C	A	NA	-0.0483	0.0098	9.25e-07
AFB	rs1985457	12:51534763	A	G	NA	0.047	0.0102	4.45e-06
AFB	rs2029356	1:92209311	C	T	NA	0.0543	0.0104	1.94e-07
AFB	rs2069278	1:66635371	C	T	NA	-0.0576	0.0097	3.13e-09
AFB	rs2116207	15:86928591	C	T	NA	0.0494	0.0102	1.23e-06
AFB	rs2178487	5:30843788	A	T	NA	-0.054	0.0098	3.37e-08
AFB	rs2287026	1:156230002	A	G	NA	-0.0585	0.0111	1.42e-07
AFB	rs2341463	2:44843677	T	A	NA	-0.0483	0.0097	6.12e-07
AFB	rs2347867	6:152229850	A	G	NA	0.0818	0.0095	5.04e-18
AFB	rs2417344	12:14517191	T	C	NA	-0.0498	0.0093	9.47e-08
AFB	rs2756117	6:153066908	A	G	NA	0.0649	0.0142	4.99e-06
AFB	rs28792763	15:90081905	A	G	NA	0.0462	0.0099	3.09e-06
AFB	rs292423	5:163053445	A	G	NA	-0.0457	0.0093	9.46e-07
AFB	rs293566	20:31097877	C	T	NA	-0.0694	0.0099	2.18e-12
AFB	rs297595	2:157365593	T	C	NA	0.0477	0.0104	4.52e-06
AFB	rs304956	15:70172390	C	G	NA	-0.0543	0.0111	9.98e-07
AFB	rs336586	3:161081347	A	G	NA	0.0421	0.009	3.17e-06
AFB	rs33920398	5:24900760	C	T	NA	-0.0573	0.0104	3.93e-08
AFB	rs34137317	6:31604894	T	C	NA	0.2473	0.04	6.15e-10
AFB	rs34198529	4:159803720	T	C	NA	-0.0518	0.0097	8.39e-08
AFB	rs34642555	1:4694470	A	G	NA	0.0554	0.0104	9.78e-08
AFB	rs350720	2:52980071	C	T	NA	0.0503	0.0091	2.8e-08
AFB	rs35662541	16:83608719	G	C	NA	0.0466	0.0098	2.01e-06
AFB	rs358905	3:155404417	T	C	NA	0.0633	0.0123	2.52e-07
AFB	rs359271	2:60463149	C	T	NA	-0.0622	0.0098	1.88e-10
AFB	rs36087033	4:176904037	C	G	NA	-0.0546	0.0113	1.32e-06
AFB	rs3739222	8:142205904	G	C	NA	-0.0454	0.0095	1.9e-06
AFB	rs3767654	1:220331319	G	T	NA	0.0625	0.0115	5.9e-08
AFB	rs3802764	11:95514599	A	T	NA	0.0466	0.0097	1.37e-06
AFB	rs3823707	7:14026829	C	G	NA	-0.0462	0.0095	1.05e-06
AFB	rs3843604	11:92524385	T	A	NA	-0.0633	0.0125	4.51e-07
AFB	rs42074	7:95713851	C	T	NA	-0.0613	0.0132	3.29e-06
AFB	rs4244533	11:28008972	A	G	NA	-0.0719	0.0119	1.33e-09
AFB	rs4288458	9:11433965	G	T	NA	0.0457	0.0099	4.02e-06
AFB	rs4400967	14:51548540	A	G	NA	-0.0501	0.0107	2.91e-06
AFB	rs4756059	11:46150619	T	C	NA	0.0854	0.0175	1.03e-06
AFB	rs4800201	18:22636415	A	G	NA	-0.0567	0.0105	6.05e-08
AFB	rs4899720	14:40899880	G	T	NA	0.046	0.0092	5.91e-07
AFB	rs55637974	2:23750902	G	T	NA	0.0574	0.0116	7.86e-07
AFB	rs55812682	12:24575802	G	A	NA	0.1338	0.0275	1.18e-06
AFB	rs5763436	22:30121577	T	A	NA	-0.0542	0.0097	1.94e-08
AFB	rs58064598	11:133168813	G	A	NA	0.071	0.0135	1.37e-07
AFB	rs59203028	17:77911282	A	T	NA	0.0627	0.0136	3.92e-06
AFB	rs60222682	18:36510587	T	C	NA	-0.0646	0.0117	3.51e-08
AFB	rs6030805	20:41997943	T	G	NA	0.0629	0.0125	5.17e-07
AFB	rs6075409	20:18718861	G	T	NA	-0.0571	0.0114	5.97e-07
AFB	rs6079584	20:14840502	C	A	NA	0.0446	0.0092	1.21e-06
AFB	rs61750814	4:77053834	C	T	NA	-0.0796	0.0129	6.32e-10
AFB	rs61825260	1:200824978	T	C	NA	-0.0455	0.01	4.83e-06
AFB	rs61866028	10:68446267	G	A	NA	-0.1391	0.0281	7.14e-07
AFB	rs62254215	3:84642928	A	G	NA	0.0565	0.0099	1.08e-08
AFB	rs6497856	16:25440885	T	C	NA	0.0436	0.0095	4.88e-06
AFB	rs6574018	14:72213258	T	G	NA	0.0556	0.01	2.42e-08
AFB	rs6699502	1:70040491	T	C	NA	0.0482	0.0098	9.68e-07
AFB	rs68046732	2:8733076	T	C	NA	-0.0516	0.0099	2.16e-07
AFB	rs687266	1:229974348	G	A	NA	-0.0442	0.0091	1.34e-06
AFB	rs6908444	6:63749513	A	G	NA	-0.0558	0.0102	4.51e-08
AFB	rs6923535	6:19859654	A	G	NA	-0.052	0.0093	2.12e-08
AFB	rs693691	1:88845494	C	T	NA	-0.077	0.0135	1.26e-08
AFB	rs6964957	7:151330390	T	C	NA	0.0468	0.0094	6.19e-07
AFB	rs7222403	17:19879164	C	T	NA	-0.0459	0.0094	9.09e-07
AFB	rs72779695	2:12797853	T	C	NA	-0.0849	0.0145	4.87e-09
AFB	rs73058329	3:35906275	C	T	NA	-0.0735	0.0148	6.95e-07
AFB	rs734697	9:78000803	A	G	NA	0.0465	0.0097	1.64e-06
AFB	rs7359501	17:56641200	T	C	NA	0.0565	0.0094	1.82e-09
AFB	rs7516843	1:210322929	G	A	NA	0.0611	0.0097	3.12e-10
AFB	rs75180746	4:30657687	G	T	NA	0.0689	0.0149	4.04e-06
AFB	rs7613251	3:41420097	G	T	NA	0.0484	0.0104	3.16e-06
AFB	rs77576048	16:90078724	T	C	NA	0.0881	0.0164	7.44e-08
AFB	rs7833819	8:87931259	T	A	NA	0.051	0.0101	4.73e-07
AFB	rs78928669	7:71782460	G	A	NA	0.142	0.0259	4.22e-08
AFB	rs7911488	10:105154089	G	A	NA	0.0477	0.0096	7.28e-07
AFB	rs7917664	10:15115515	T	C	NA	0.0513	0.0105	8.99e-07
AFB	rs7923366	10:82027088	G	A	NA	0.0487	0.01	1.1e-06
AFB	rs7958796	12:84043145	T	A	NA	-0.0676	0.0101	2.15e-11
AFB	rs7963954	12:50064928	G	A	NA	0.0654	0.0121	6.02e-08
AFB	rs7991062	13:100713194	G	C	NA	-0.047	0.0102	4.34e-06
AFB	rs8013706	14:27104414	C	T	NA	0.0574	0.0108	1.05e-07
AFB	rs80153284	2:156465747	A	C	NA	0.2314	0.0411	1.74e-08
AFB	rs8030494	15:74092777	A	C	NA	0.0545	0.0096	1.3e-08
AFB	rs8110682	19:13285293	C	T	NA	0.0695	0.011	2.59e-10
AFB	rs9374255	6:111375296	T	C	NA	0.0444	0.0094	2.32e-06
AFB	rs9401333	6:98353935	C	A	NA	-0.0705	0.0101	3.24e-12
AFB	rs9561331	13:94017476	A	G	NA	-0.0695	0.0137	3.61e-07
AFB	rs9574745	13:36426667	C	T	NA	0.0545	0.0113	1.5e-06
AFB	rs977603	4:101884040	A	G	NA	0.0601	0.0121	7.28e-07
AFB	rs9818010	3:132558241	T	G	NA	0.063	0.0102	5.63e-10
AFB	rs9838987	3:49916044	G	A	NA	-0.1175	0.0098	5.55e-33
AFB	rs9884700	4:27980615	G	A	NA	0.0556	0.0107	2.01e-07
AFB	rs9953192	18:33404196	G	A	NA	0.0477	0.0102	2.81e-06
AAM	rs10096802	8:73838986	A	G	NA	-0.0564	0.0123	4.09e-06
AAM	rs1079866	7:41470093	G	C	NA	0.0906	0.0182	6.82e-07
AAM	rs111869955	7:130376094	A	G	NA	-0.2164	0.0468	3.82e-06
AAM	rs114908946	3:55506748	A	C	NA	-0.2151	0.0462	3.18e-06
AAM	rs116139328	4:146793756	T	C	NA	-0.1927	0.0403	1.75e-06
AAM	rs11682311	2:16464977	C	T	NA	0.0591	0.0127	3.39e-06
AAM	rs11700284	20:37295126	A	G	NA	0.0723	0.0141	3.08e-07
AAM	rs11870350	17:74912485	A	G	NA	-0.1239	0.027	4.65e-06
AAM	rs1239081	2:78829993	A	G	NA	-0.0696	0.0129	7.19e-08
AAM	rs1294862	7:45257251	A	G	NA	0.0758	0.0155	9.8e-07
AAM	rs138536908	4:14674903	G	A	NA	0.2618	0.0568	3.99e-06
AAM	rs138614322	9:97607413	T	A	NA	0.2353	0.0508	3.66e-06
AAM	rs144325671	7:148710216	A	T	NA	-0.1902	0.0406	2.77e-06
AAM	rs1456547	2:199795231	G	A	NA	-0.0586	0.0126	3.32e-06
AAM	rs147247292	1:48415219	C	A	NA	-0.1611	0.0341	2.29e-06
AAM	rs148511831	3:32502589	G	A	NA	-0.273	0.057	1.68e-06
AAM	rs148585725	8:32406656	T	C	NA	-0.1932	0.0422	4.59e-06
AAM	rs16898051	5:67965602	T	C	NA	0.0791	0.0173	4.81e-06
AAM	rs16924631	9:6486308	C	G	NA	-0.0904	0.0164	3.67e-08
AAM	rs17099475	5:142158599	C	T	NA	-0.1173	0.0242	1.2e-06
AAM	rs1885737	10:10251440	T	A	NA	-0.074	0.0149	6.38e-07
AAM	rs1915146	10:126846214	G	A	NA	0.0622	0.0122	3.2e-07
AAM	rs2137288	18:44752041	G	A	NA	0.0558	0.0122	4.41e-06
AAM	rs2203873	9:111966930	T	C	NA	-0.0624	0.0132	2.21e-06
AAM	rs2392962	10:57575119	C	T	NA	0.0557	0.0121	4.12e-06
AAM	rs2700204	3:112841569	T	C	NA	-0.059	0.0122	1.37e-06
AAM	rs2941285	1:245403490	A	G	NA	-0.063	0.0127	6.69e-07
AAM	rs2959086	11:46102319	T	A	NA	0.1095	0.0213	2.71e-07
AAM	rs314268	6:105417978	A	G	NA	-0.1401	0.0128	5.09e-28
AAM	rs35027961	7:71311612	C	A	NA	-0.0589	0.0128	4.45e-06
AAM	rs4453065	1:7448126	T	C	NA	0.0736	0.0151	1.15e-06
AAM	rs6034752	20:17115554	A	G	NA	-0.084	0.016	1.53e-07
AAM	rs62318264	4:132455809	G	A	NA	0.0659	0.0134	9.23e-07
AAM	rs6690942	1:151629958	G	A	NA	-0.0851	0.0168	4.08e-07
AAM	rs7114175	11:122813983	T	A	NA	0.0746	0.0128	6.26e-09
AAM	rs73009603	11:100728497	T	C	NA	0.1598	0.0334	1.7e-06
AAM	rs75743052	18:67964381	T	C	NA	0.1085	0.0218	6.89e-07
AAM	rs7740302	6:151826249	C	T	NA	-0.0774	0.0158	9.18e-07
AAM	rs78254944	6:20763313	A	T	NA	0.1185	0.0258	4.36e-06
AAM	rs78260602	10:8232835	A	G	NA	0.0966	0.0195	6.74e-07
AAM	rs7834279	8:126386055	C	G	NA	-0.0774	0.0156	7.13e-07
AAM	rs79627842	1:165406187	C	T	NA	-0.1301	0.0182	8.23e-13
AAM	rs79673115	6:101263728	G	T	NA	0.1543	0.0314	8.65e-07
AAM	rs79777531	8:90105562	C	T	NA	-0.1297	0.0268	1.28e-06
AAM	rs8078178	17:6035152	T	C	NA	-0.0673	0.0146	4.38e-06
AAM	rs907392	15:77903393	C	T	NA	0.0694	0.013	9.74e-08
AAM	rs936018	17:42475962	C	A	NA	-0.1856	0.0359	2.32e-07
AAM	rs951993	6:77142000	A	G	NA	-0.0632	0.013	1.12e-06
AAM	rs9603603	13:40300328	G	T	NA	0.0668	0.0135	7.06e-07
AAM	rs976760	7:14273653	C	T	NA	-0.0724	0.0154	2.71e-06
AAM	rs979006	4:54452878	G	A	NA	-0.087	0.0185	2.72e-06
AAM	rs9808305	2:181475739	T	C	NA	-0.0606	0.0126	1.65e-06
AAM	rs985983	13:104365348	G	A	NA	0.0712	0.0137	2.04e-07
Body fat percentage	rs10050620	5:63927239	T	C	0.3254	-0.0103	0.0016	3.8e-10
Body fat percentage	rs10100245	8:77226919	A	G	0.5645	0.0152	0.0016	1.4e-22
Body fat percentage	rs10116857	9:16595649	A	C	0.0618	-0.0219	0.0032	7.9e-12
Body fat percentage	rs1013293	1:62570321	A	G	0.4303	-0.0139	0.0016	4.1e-19
Body fat percentage	rs10144067	14:93885198	T	C	0.5913	0.0101	0.0016	1.8e-10
Body fat percentage	rs10146997	14:79945162	G	A	0.2219	0.0187	0.0019	6.3e-24
Body fat percentage	rs10187101	2:50742227	T	C	0.3636	-0.0102	0.0016	1.4e-10
Body fat percentage	rs10209821	2:228980358	T	C	0.3426	0.0124	0.0016	2.2e-14
Body fat percentage	rs10245306	7:158029340	C	G	0.686	0.0092	0.0017	4.3e-08
Body fat percentage	rs10259620	7:27202289	G	A	0.7872	-0.014	0.0019	1.6e-13
Body fat percentage	rs10271582	7:99121950	G	A	0.154	-0.0138	0.0021	9.1e-11
Body fat percentage	rs1038088	17:28074563	G	T	0.5193	0.0125	0.0015	4e-16
Body fat percentage	rs10423928	19:46182304	A	T	0.1944	-0.0233	0.0019	7.4e-33
Body fat percentage	rs10496731	2:135597628	G	T	0.3749	-0.0115	0.0016	3.7e-13
Body fat percentage	rs10505836	12:19288508	C	A	0.86	0.0128	0.0022	9.6e-09
Body fat percentage	rs10510025	10:118650996	T	C	0.2471	0.0129	0.0018	5.6e-13
Body fat percentage	rs10513935	18:1660497	A	G	0.3015	-0.0094	0.0017	2.2e-08
Body fat percentage	rs1056441	20:62370349	C	T	0.6753	0.0121	0.0016	2.5e-13
Body fat percentage	rs10756798	9:16739763	T	C	0.6424	-0.014	0.0016	2.8e-18
Body fat percentage	rs1078455	3:108129348	C	T	0.3095	0.0096	0.0017	9.1e-09
Body fat percentage	rs10788497	10:88127995	C	G	0.4996	0.0104	0.0015	1.7e-11
Body fat percentage	rs10854853	22:48874412	T	G	0.4568	0.0104	0.0016	1.6e-11
Body fat percentage	rs1086103	4:145920099	A	C	0.0458	-0.0214	0.0037	6.7e-09
Body fat percentage	rs10867315	9:81574729	A	G	0.1906	-0.0112	0.002	1.5e-08
Body fat percentage	rs10896012	11:65278461	C	T	0.2174	0.0115	0.0019	7.8e-10
Body fat percentage	rs10938397	4:45182527	G	A	0.4343	0.0202	0.0016	2e-38
Body fat percentage	rs10959841	9:11469190	C	T	0.3874	-0.0091	0.0016	9.2e-09
Body fat percentage	rs10999460	10:72428283	T	C	0.2655	0.0169	0.0018	6.1e-22
Body fat percentage	rs11012732	10:21830104	G	A	0.3317	0.0166	0.0016	3.8e-24
Body fat percentage	rs11022718	11:13268144	T	C	0.203	-0.0108	0.0019	2.5e-08
Body fat percentage	rs11030016	11:27487992	T	C	0.7398	0.0133	0.0018	5.2e-14
Body fat percentage	rs11030108	11:27695464	G	A	0.68	-0.0185	0.0017	3.8e-29
Body fat percentage	rs11062595	12:3367760	G	C	0.0922	-0.0153	0.0027	9.5e-09
Body fat percentage	rs11079849	17:47090785	T	C	0.3286	-0.013	0.0016	2.3e-15
Body fat percentage	rs11105842	12:91243910	A	G	0.3675	-0.0102	0.0016	2.5e-10
Body fat percentage	rs11119208	1:209211968	G	A	0.6149	-0.0097	0.0016	9.7e-10
Body fat percentage	rs11122450	1:230301811	G	T	0.6117	-0.0102	0.0016	1.3e-10
Body fat percentage	rs11129660	3:35695961	T	C	0.2098	0.011	0.0019	5.8e-09
Body fat percentage	rs11150745	17:78757626	G	A	0.3177	-0.0127	0.0017	2.2e-14
Body fat percentage	rs11165643	1:96924097	T	C	0.5901	0.0147	0.0016	5.9e-21
Body fat percentage	rs11205303	1:149906413	C	T	0.4066	0.0183	0.0016	1.3e-31
Body fat percentage	rs11208779	1:66417145	C	G	0.5289	0.0103	0.0015	2.4e-11
Body fat percentage	rs11222371	11:130745719	T	C	0.4092	0.0118	0.0016	5e-14
Body fat percentage	rs11245344	10:126418782	T	C	0.5711	0.0094	0.0016	1.9e-09
Body fat percentage	rs112710809	4:73550401	T	C	0.0635	0.021	0.0032	4.5e-11
Body fat percentage	rs112852122	20:47498117	A	G	0.1578	-0.0164	0.0022	2.1e-14
Body fat percentage	rs11343	16:19279464	G	T	0.5613	0.0087	0.0016	4.4e-08
Body fat percentage	rs113503736	4:19204890	G	T	0.2234	-0.0103	0.0019	2.9e-08
Body fat percentage	rs113941571	15:52268996	T	C	0.0787	0.021	0.003	1.7e-12
Body fat percentage	rs11538	22:18220831	G	A	0.1718	0.0122	0.002	2.8e-09
Body fat percentage	rs11619393	13:20262266	C	T	0.145	0.0146	0.0022	2.5e-11
Body fat percentage	rs11619722	13:27998600	C	T	0.3009	-0.0108	0.0017	1.3e-10
Body fat percentage	rs11664106	18:2846812	T	A	0.3739	0.011	0.0016	1.8e-11
Body fat percentage	rs11664848	18:42575661	G	C	0.6596	0.0097	0.0016	3.6e-09
Body fat percentage	rs11666808	19:18383506	C	T	0.6253	-0.0177	0.0016	1.9e-28
Body fat percentage	rs11677541	2:165429235	A	G	0.5353	-0.0092	0.0015	2.5e-09
Body fat percentage	rs117176448	8:27261138	G	C	0.0962	0.0173	0.0026	3.6e-11
Body fat percentage	rs11782074	8:142617096	T	G	0.3836	0.0107	0.0016	3.6e-11
Body fat percentage	rs11786089	8:21975521	G	A	0.4597	0.0113	0.0015	3.1e-13
Body fat percentage	rs11852419	15:41456374	T	A	0.2617	0.0106	0.0018	1.3e-09
Body fat percentage	rs11855853	15:78012618	T	C	0.2694	-0.0104	0.0017	2.7e-09
Body fat percentage	rs11866219	16:69549749	C	A	0.5838	-0.0159	0.0016	1.3e-23
Body fat percentage	rs12042959	1:243533273	G	A	0.1439	-0.0146	0.0022	3.7e-11
Body fat percentage	rs12053559	2:138416391	G	T	0.4712	0.0086	0.0015	2.9e-08
Body fat percentage	rs12072739	1:98315893	G	A	0.2246	0.0134	0.0018	3.7e-13
Body fat percentage	rs12103006	16:24726237	G	A	0.5691	0.0105	0.0016	1.8e-11
Body fat percentage	rs1229984	4:100239319	C	T	0.9728	0.031	0.0047	3.3e-11
Body fat percentage	rs12375196	7:103416541	A	C	0.4243	0.0103	0.0016	5.2e-11
Body fat percentage	rs12376870	9:117890567	A	G	0.2377	-0.011	0.0018	1.3e-09
Body fat percentage	rs12402939	1:150615094	C	A	0.3924	-0.0102	0.0016	1.1e-10
Body fat percentage	rs12419272	11:117015516	G	C	0.0569	0.0207	0.0033	5.5e-10
Body fat percentage	rs12432026	14:75282116	G	T	0.5401	0.01	0.0015	1.2e-10
Body fat percentage	rs12441543	15:31689543	A	G	0.2871	0.0114	0.0017	2.5e-11
Body fat percentage	rs12459965	19:18452195	T	C	0.2676	-0.0127	0.0017	4.2e-13
Body fat percentage	rs12462975	19:30272202	A	G	0.3296	0.0123	0.0017	8.2e-14
Body fat percentage	rs12475388	2:27039792	A	G	0.4857	-0.0099	0.0015	1.6e-10
Body fat percentage	rs12538435	7:71437104	G	A	0.2618	-0.011	0.0018	3.7e-10
Body fat percentage	rs12619178	2:100838157	T	C	0.4008	-0.0145	0.0016	3e-20
Body fat percentage	rs12628603	22:38119213	A	G	0.6171	-0.0096	0.0016	1.6e-09
Body fat percentage	rs12639116	3:62434127	T	C	0.0966	-0.0161	0.0026	7.8e-10
Body fat percentage	rs12658319	5:153551892	T	C	0.2991	0.0107	0.0017	2e-10
Body fat percentage	rs12670456	7:122102781	G	A	0.3018	0.0094	0.0017	2.1e-08
Body fat percentage	rs12724928	1:113128931	C	T	0.2049	-0.0147	0.0019	1.3e-14
Body fat percentage	rs1284373	1:33355923	T	C	0.1992	-0.0109	0.0019	1.6e-08
Body fat percentage	rs12890931	14:69753369	G	T	0.3624	0.0121	0.0016	7.4e-14
Body fat percentage	rs12926311	16:406427	C	G	0.3535	-0.0092	0.0016	1.4e-08
Body fat percentage	rs13026103	2:16611534	A	G	0.741	0.0096	0.0018	4.3e-08
Body fat percentage	rs13064797	3:173656059	A	G	0.2052	-0.0109	0.0019	1.3e-08
Body fat percentage	rs13107325	4:103188709	T	C	0.0749	0.0324	0.0029	2.1e-28
Body fat percentage	rs13132853	4:38680015	G	A	0.3602	-0.0094	0.0016	6.1e-09
Body fat percentage	rs13174863	5:139080745	G	A	0.1481	0.0129	0.0022	3.7e-09
Body fat percentage	rs1318408	1:11925781	G	A	0.1195	0.0158	0.0024	3.2e-11
Body fat percentage	rs1322842	6:20488897	G	A	0.6095	-0.0115	0.0016	4.6e-13
Body fat percentage	rs13249935	8:143611456	C	T	0.3667	0.0095	0.0016	3.4e-09
Body fat percentage	rs13292699	9:15910044	C	A	0.4337	-0.02	0.0016	1e-37
Body fat percentage	rs13389219	2:165528876	T	C	0.3924	0.0171	0.0016	1.7e-27
Body fat percentage	rs13408397	2:69582028	T	C	0.4111	-0.0131	0.0016	5.7e-17
Body fat percentage	rs13436840	5:157926656	T	C	0.2651	0.0136	0.0017	6.3e-15
Body fat percentage	rs1350429	12:41819131	G	A	0.4803	0.0097	0.0015	3e-10
Body fat percentage	rs1377184	1:215246432	T	A	0.749	0.0127	0.0018	8.4e-13
Body fat percentage	rs1421334	8:30865733	C	A	0.5488	-0.0113	0.0016	4e-13
Body fat percentage	rs1436348	3:104612668	G	A	0.5827	0.0108	0.0016	4.7e-12
Body fat percentage	rs1441264	13:79580919	A	G	0.5937	0.012	0.0016	7.8e-14
Body fat percentage	rs1453055	2:181329491	A	G	0.2734	0.0127	0.0017	2.9e-13
Body fat percentage	rs1454687	3:94038085	G	C	0.5154	-0.0135	0.0015	1.5e-18
Body fat percentage	rs1456014	2:46899742	G	A	0.2056	-0.0151	0.0019	2.1e-15
Body fat percentage	rs1469084	19:33868013	G	A	0.5457	0.0088	0.0015	1.4e-08
Body fat percentage	rs1475860	21:18085482	C	G	0.5054	0.0088	0.0016	1.7e-08
Body fat percentage	rs149380583	15:80993786	C	G	0.1287	-0.0128	0.0023	3.3e-08
Body fat percentage	rs1503526	5:63020706	C	T	0.48	0.0114	0.0015	1.6e-13
Body fat percentage	rs1559900	8:14207321	T	C	0.2861	0.0099	0.0017	7.1e-09
Body fat percentage	rs1568488	3:153657951	C	G	0.5949	0.0117	0.0016	1.2e-13
Body fat percentage	rs1605898	11:85168172	A	T	0.8376	0.0129	0.0021	6.4e-10
Body fat percentage	rs1624064	6:26378681	C	T	0.4204	-0.0106	0.0016	1e-11
Body fat percentage	rs16916303	9:30823761	G	A	0.1198	-0.0144	0.0024	2.1e-09
Body fat percentage	rs16934748	10:33970319	C	T	0.1503	0.0129	0.0022	2.3e-09
Body fat percentage	rs16996657	20:15816236	C	T	0.1278	0.014	0.0023	1.4e-09
Body fat percentage	rs17016133	3:25313167	C	T	0.1301	-0.0137	0.0023	2e-09
Body fat percentage	rs17024393	1:110154688	C	T	0.0259	0.0474	0.0049	1.6e-22
Body fat percentage	rs17055384	13:59285126	T	C	0.183	-0.0123	0.002	7.3e-10
Body fat percentage	rs17172722	7:46620312	T	C	0.4189	-0.0108	0.0016	5.8e-12
Body fat percentage	rs17193211	21:38885506	T	C	0.0668	-0.018	0.0031	9.6e-09
Body fat percentage	rs1724557	4:137094048	A	C	0.5868	-0.011	0.0016	2.1e-12
Body fat percentage	rs17522122	14:33302882	T	G	0.4712	0.0126	0.0016	4.4e-16
Body fat percentage	rs17639996	3:61269668	A	G	0.1501	-0.0143	0.0022	3.6e-11
Body fat percentage	rs17704028	7:95140031	T	C	0.1472	-0.0147	0.0022	1.7e-11
Body fat percentage	rs17770336	9:28414625	T	C	0.3224	0.0155	0.0016	5.8e-21
Body fat percentage	rs17820010	5:50384662	G	T	0.2956	0.0124	0.0017	1.7e-13
Body fat percentage	rs1782508	11:30243795	G	C	0.6555	-0.0091	0.0016	1.7e-08
Body fat percentage	rs1787013	18:13072979	C	T	0.4507	0.0096	0.0016	5.6e-10
Body fat percentage	rs1799923	3:42306294	G	A	0.8866	0.0141	0.0024	6.3e-09
Body fat percentage	rs1801282	3:12393125	G	C	0.1195	0.0301	0.0024	4.6e-37
Body fat percentage	rs1808629	8:73435964	A	G	0.6854	-0.0163	0.0017	1.2e-22
Body fat percentage	rs1813039	8:76295984	A	G	0.7097	0.0103	0.0017	1.4e-09
Body fat percentage	rs1861410	2:58933591	T	C	0.5553	-0.0136	0.0016	2.1e-18
Body fat percentage	rs1881505	11:1483177	C	T	0.943	-0.0192	0.0034	1e-08
Body fat percentage	rs1893659	18:21080859	A	C	0.4601	-0.0164	0.0016	6.1e-26
Body fat percentage	rs1906252	6:98550289	A	C	0.4844	-0.0162	0.0015	1.4e-25
Body fat percentage	rs1945160	18:22164216	A	G	0.3759	-0.0096	0.0016	1.8e-09
Body fat percentage	rs1964675	3:136114945	T	C	0.7111	0.0097	0.0017	1.3e-08
Body fat percentage	rs1991002	5:52848593	G	T	0.4952	-0.0101	0.0015	7.2e-11
Body fat percentage	rs2002023	10:76848524	T	C	0.4091	0.0102	0.0016	6.8e-11
Body fat percentage	rs2008018	17:61954471	A	G	0.3221	0.011	0.0016	2.4e-11
Body fat percentage	rs2034946	17:73863589	G	T	0.2088	0.0119	0.0019	3.3e-10
Body fat percentage	rs2108635	12:2159556	G	A	0.3385	0.0098	0.0016	1.8e-09
Body fat percentage	rs215669	7:32378979	A	G	0.6117	-0.0121	0.0016	2.6e-14
Body fat percentage	rs2165991	15:53101700	G	A	0.2537	0.0118	0.0018	3.6e-11
Body fat percentage	rs2172131	10:133978962	C	T	0.5785	-0.0111	0.0016	1.3e-12
Body fat percentage	rs2178899	6:31606756	T	A	0.1288	-0.0191	0.0023	8.5e-17
Body fat percentage	rs2182717	6:120219180	A	G	0.691	0.0101	0.0017	1.5e-09
Body fat percentage	rs2190788	5:144484261	T	G	0.3197	0.011	0.0017	2.9e-11
Body fat percentage	rs2192527	4:18329824	G	A	0.4655	0.0141	0.0015	6.6e-20
Body fat percentage	rs2192649	7:78126279	G	T	0.5008	0.0085	0.0016	3.8e-08
Body fat percentage	rs2243928	13:111981707	G	C	0.649	-0.012	0.0016	1.9e-13
Body fat percentage	rs2274224	10:96039597	C	G	0.4355	-0.0159	0.0016	1.4e-24
Body fat percentage	rs2276936	4:89726283	C	A	0.4704	-0.0124	0.0015	1.2e-15
Body fat percentage	rs2291127	3:138122477	T	C	0.1562	-0.0138	0.0021	7.7e-11
Body fat percentage	rs2307111	5:75003678	C	T	0.3951	-0.0171	0.0016	1.5e-27
Body fat percentage	rs2371767	3:64718258	C	G	0.2778	0.0118	0.0017	6.2e-12
Body fat percentage	rs2415142	15:73431600	G	T	0.5488	0.0134	0.0016	7.7e-18
Body fat percentage	rs2481899	14:56460686	G	A	0.5512	0.0093	0.0016	2.5e-09
Body fat percentage	rs2499468	6:51809081	A	C	0.651	0.01	0.0016	5.7e-10
Body fat percentage	rs2508782	11:94269813	G	A	0.5697	0.0094	0.0016	1.7e-09
Body fat percentage	rs252749	5:77389973	A	G	0.246	-0.0103	0.0018	9.4e-09
Body fat percentage	rs256904	5:55810305	T	A	0.7463	-0.0112	0.0018	2.5e-10
Body fat percentage	rs262953	3:183467986	A	G	0.626	-0.0103	0.0016	1.2e-10
Body fat percentage	rs2640465	1:29569645	G	A	0.902	0.0159	0.0026	9.4e-10
Body fat percentage	rs2660241	16:4940023	C	T	0.3649	0.0109	0.0016	1.2e-11
Body fat percentage	rs2678204	1:201800511	G	T	0.3402	0.0136	0.0016	4.7e-17
Body fat percentage	rs2692741	2:76185292	C	G	0.3672	0.0091	0.0016	1.6e-08
Body fat percentage	rs2702123	2:24562699	C	T	0.086	-0.0153	0.0027	2.6e-08
Body fat percentage	rs2731238	12:90559598	T	G	0.0675	-0.0219	0.0034	8.5e-11
Body fat percentage	rs2785988	1:219744138	A	C	0.2974	0.0211	0.0017	4.9e-36
Body fat percentage	rs2802774	1:203527812	A	C	0.5473	0.0106	0.0016	1.5e-11
Body fat percentage	rs2814993	6:34618893	A	G	0.1398	0.0259	0.0022	1.5e-31
Body fat percentage	rs2855818	17:42290015	A	G	0.2415	0.0153	0.0018	3.7e-17
Body fat percentage	rs28651380	4:34773227	G	A	0.2812	0.0104	0.0017	1.2e-09
Body fat percentage	rs28672845	3:88270627	C	A	0.84	0.0115	0.0021	4.1e-08
Body fat percentage	rs28714450	8:9777555	T	C	0.6752	-0.0101	0.0017	8.7e-10
Body fat percentage	rs28742003	15:68127769	T	C	0.2053	-0.0211	0.0019	1.9e-28
Body fat percentage	rs2888778	2:41608611	G	T	0.6522	0.01	0.0016	6.3e-10
Body fat percentage	rs2943653	2:227047771	T	C	0.6729	-0.0155	0.0016	2.9e-21
Body fat percentage	rs2954033	8:126493746	G	A	0.6952	0.0124	0.0017	1.2e-13
Body fat percentage	rs2957678	11:10407955	C	T	0.4982	0.0116	0.0015	4.4e-14
Body fat percentage	rs2960420	3:12314512	G	C	0.3507	-0.0091	0.0016	1.8e-08
Body fat percentage	rs2966859	16:85324544	G	A	0.789	-0.0111	0.0019	4.2e-09
Body fat percentage	rs2984618	1:47690438	T	G	0.4162	0.0117	0.0016	5.7e-14
Body fat percentage	rs3113509	4:52932825	T	C	0.732	-0.0107	0.0017	7.1e-10
Body fat percentage	rs319775	17:31495076	C	T	0.6088	0.0088	0.0016	2.2e-08
Body fat percentage	rs33836	19:34008600	T	C	0.4643	-0.0164	0.0016	1.5e-25
Body fat percentage	rs34338229	6:15370313	A	G	0.332	0.009	0.0016	4.6e-08
Body fat percentage	rs34483452	5:87986314	A	C	0.1363	0.0245	0.0023	2.5e-27
Body fat percentage	rs34580448	5:82810884	C	T	0.0412	-0.0308	0.0039	2.1e-15
Body fat percentage	rs34656389	4:96153214	G	A	0.3675	0.0103	0.0016	1.1e-10
Body fat percentage	rs347551	5:119389031	G	C	0.4723	0.0099	0.0016	2.8e-10
Body fat percentage	rs35154152	1:155172725	C	T	0.1068	-0.0178	0.0025	1e-12
Body fat percentage	rs35523808	6:75834971	A	T	0.0491	0.0205	0.0037	2.2e-08
Body fat percentage	rs3743861	16:89818340	C	G	0.4153	-0.0104	0.0016	3.7e-11
Body fat percentage	rs3754963	2:166185707	T	A	0.2551	-0.0115	0.0018	7.6e-11
Body fat percentage	rs3764002	12:108618630	T	C	0.2615	-0.0187	0.0018	2e-26
Body fat percentage	rs3765971	1:8445360	T	C	0.6585	-0.0102	0.0016	3e-10
Body fat percentage	rs3766823	1:32197257	A	G	0.172	0.014	0.002	6.3e-12
Body fat percentage	rs3791709	2:212286934	T	A	0.2824	0.0103	0.0017	1.6e-09
Body fat percentage	rs3803286	14:103246470	G	A	0.6667	-0.0116	0.0016	1.4e-12
Body fat percentage	rs3817428	15:89415247	G	C	0.265	-0.0153	0.0017	2.5e-18
Body fat percentage	rs3826408	17:7101292	T	C	0.4569	0.0092	0.0015	3.4e-09
Body fat percentage	rs3911063	3:85906928	C	T	0.322	-0.0122	0.0017	1.6e-13
Body fat percentage	rs3923501	9:103065884	T	C	0.4758	0.0102	0.0015	3.4e-11
Body fat percentage	rs394608	21:46581798	C	T	0.5377	0.0124	0.0016	1.6e-15
Body fat percentage	rs396354	2:86850022	C	T	0.7157	-0.0099	0.0017	8e-09
Body fat percentage	rs396755	5:104022239	G	C	0.5711	-0.0103	0.0016	4.1e-11
Body fat percentage	rs40071	5:107496102	C	T	0.1795	-0.0149	0.002	1.4e-13
Body fat percentage	rs41307479	9:116082647	G	C	0.2206	0.0124	0.0019	2.6e-11
Body fat percentage	rs41310284	10:102447647	A	C	0.101	-0.0201	0.0026	5.7e-15
Body fat percentage	rs429343	2:147903382	G	A	0.5766	-0.0111	0.0016	9.6e-13
Body fat percentage	rs429358	19:45411941	C	T	0.154	-0.0215	0.0021	9.2e-24
Body fat percentage	rs4320040	3:157884946	G	T	0.5603	-0.0102	0.0015	4.7e-11
Body fat percentage	rs4398538	4:130724740	C	T	0.6425	-0.01	0.0016	5.2e-10
Body fat percentage	rs441792	2:105404221	G	A	0.4866	0.0119	0.0015	1e-14
Body fat percentage	rs4466418	8:126323787	A	G	0.5623	0.01	0.0016	1.4e-10
Body fat percentage	rs4482463	2:205375909	A	C	0.9231	-0.0211	0.0029	3e-13
Body fat percentage	rs4496901	7:104898337	T	G	0.6552	-0.0095	0.0016	4e-09
Body fat percentage	rs4500770	16:74658430	T	A	0.3626	-0.0098	0.0016	1.2e-09
Body fat percentage	rs4547574	2:48541003	T	A	0.2277	-0.0106	0.0018	7.8e-09
Body fat percentage	rs4690324	4:960081	A	G	0.8232	-0.0127	0.002	3.9e-10
Body fat percentage	rs4709745	6:164105984	C	T	0.3072	0.0093	0.0017	2.3e-08
Body fat percentage	rs4718964	7:70038969	T	G	0.4131	0.0111	0.0016	1.5e-12
Body fat percentage	rs4722398	7:3125220	T	C	0.1361	0.0143	0.0022	1.6e-10
Body fat percentage	rs4759318	12:54420098	T	C	0.3622	0.0104	0.0016	8.1e-11
Body fat percentage	rs4762951	12:20543307	G	A	0.7804	-0.0114	0.0019	1.1e-09
Body fat percentage	rs4776337	15:67359738	A	G	0.4681	0.01	0.0015	1.1e-10
Body fat percentage	rs479018	11:66060546	A	G	0.3325	-0.0145	0.0017	3.3e-18
Body fat percentage	rs4820323	22:38599767	G	C	0.581	-0.0169	0.0016	3.5e-27
Body fat percentage	rs482787	10:99767024	C	T	0.3258	0.0093	0.0016	1.9e-08
Body fat percentage	rs4837119	9:129672095	A	T	0.5173	-0.0102	0.0015	4.9e-11
Body fat percentage	rs4876611	8:116671848	G	A	0.7202	0.0174	0.0017	4.3e-24
Body fat percentage	rs4894808	3:171833266	C	G	0.4001	-0.0101	0.0016	3.3e-10
Body fat percentage	rs4908676	1:7737099	G	A	0.4577	0.0097	0.0015	4.4e-10
Body fat percentage	rs4959613	6:1835403	A	C	0.594	0.0096	0.0016	3.5e-09
Body fat percentage	rs529200	3:173114305	G	A	0.5278	0.0107	0.0015	4.2e-12
Body fat percentage	rs543874	1:177889480	G	A	0.2053	0.0302	0.0019	1.7e-56
Body fat percentage	rs55707359	11:46159333	G	T	0.0154	0.0375	0.0063	3.1e-09
Body fat percentage	rs55810445	7:2103739	T	C	0.1512	-0.014	0.0022	7.9e-11
Body fat percentage	rs55924785	9:136929586	T	C	0.1647	-0.0123	0.0021	2.9e-09
Body fat percentage	rs56094641	16:53806453	G	A	0.4046	0.041	0.0016	2.5e-150
Body fat percentage	rs56218501	20:46365636	T	C	0.2118	-0.0129	0.0019	8.6e-12
Body fat percentage	rs56328878	2:159459040	A	C	0.2672	-0.0098	0.0017	2e-08
Body fat percentage	rs56369689	16:30120308	G	A	0.3486	-0.0095	0.0017	9e-09
Body fat percentage	rs56399737	13:33381721	T	C	0.4492	-0.0119	0.0016	2.6e-14
Body fat percentage	rs57636386	18:58048295	C	T	0.0838	-0.0252	0.0028	1.9e-19
Body fat percentage	rs57800857	4:140863365	C	A	0.3649	-0.0133	0.0016	1.2e-16
Body fat percentage	rs58120873	2:47313562	A	G	0.0869	-0.0163	0.0027	2.8e-09
Body fat percentage	rs58862095	7:75081418	T	C	0.4193	-0.0131	0.0016	5.3e-17
Body fat percentage	rs59227842	11:43692423	G	A	0.3115	0.017	0.0017	3.4e-24
Body fat percentage	rs59499656	18:40768309	T	A	0.3432	-0.0138	0.0016	2.8e-17
Body fat percentage	rs6064113	20:53444487	C	T	0.7655	-0.0105	0.0019	1.5e-08
Body fat percentage	rs6103254	20:41990761	C	T	0.1267	-0.0148	0.0023	2.2e-10
Body fat percentage	rs61754230	12:72179446	T	C	0.0197	0.0312	0.0055	1.7e-08
Body fat percentage	rs61903695	11:89922417	G	A	0.2549	0.0118	0.0018	2.6e-11
Body fat percentage	rs61910767	11:134515899	T	C	0.1642	-0.0143	0.0021	6.8e-12
Body fat percentage	rs61969510	13:86484025	C	T	0.279	0.0127	0.0017	2.1e-13
Body fat percentage	rs61975147	14:59416558	C	T	0.1672	-0.0142	0.0021	7.3e-12
Body fat percentage	rs61986205	14:41271485	G	A	0.082	0.0189	0.0028	2.3e-11
Body fat percentage	rs62107261	2:422144	C	T	0.0483	-0.0479	0.0036	1.7e-40
Body fat percentage	rs62190394	2:230624929	T	C	0.317	0.0152	0.0017	4.8e-20
Body fat percentage	rs62218301	21:36741262	G	A	0.166	-0.0128	0.0021	8.7e-10
Body fat percentage	rs62413414	6:80310375	T	C	0.1517	0.0127	0.0021	3.3e-09
Body fat percentage	rs62443626	7:39056649	A	G	0.4639	-0.0106	0.0016	8.3e-12
Body fat percentage	rs62621197	19:8670147	T	C	0.0372	-0.025	0.0042	3.8e-09
Body fat percentage	rs6480350	10:70396822	C	T	0.5751	-0.0095	0.0016	1.1e-09
Body fat percentage	rs6491427	13:99113166	G	A	0.289	-0.014	0.0017	2e-16
Body fat percentage	rs6500594	16:4316498	G	T	0.2466	0.0111	0.0018	6.7e-10
Body fat percentage	rs6561937	13:58257667	A	T	0.7537	-0.0117	0.0018	6.9e-11
Body fat percentage	rs6567160	18:57829135	C	T	0.2327	0.0255	0.0018	3.7e-44
Body fat percentage	rs6575340	14:94023972	A	G	0.636	0.0134	0.0016	7.8e-17
Body fat percentage	rs657685	11:118912982	C	G	0.4561	-0.0099	0.0015	1.7e-10
Body fat percentage	rs6602997	15:84521398	T	C	0.7119	0.0226	0.0017	4.8e-40
Body fat percentage	rs6688826	1:80812329	C	T	0.2982	0.0106	0.0017	2.8e-10
Body fat percentage	rs6693294	1:49879122	G	A	0.6886	-0.0137	0.0017	1.7e-16
Body fat percentage	rs6699744	1:72825144	T	A	0.616	0.0143	0.0016	2.5e-19
Body fat percentage	rs6744646	2:628504	G	A	0.8283	0.0281	0.002	2.3e-43
Body fat percentage	rs6749911	2:105962339	A	G	0.127	0.0127	0.0023	3.8e-08
Body fat percentage	rs6750646	2:193872415	T	C	0.2012	-0.0118	0.0019	1e-09
Body fat percentage	rs6752378	2:25150116	A	C	0.4863	0.0224	0.0015	4.8e-48
Body fat percentage	rs6754292	2:217614584	T	C	0.6446	-0.0093	0.0016	8.4e-09
Body fat percentage	rs67609008	10:126640936	C	T	0.2836	0.0113	0.0017	3.9e-11
Body fat percentage	rs6782581	3:196979106	G	C	0.4393	-0.0102	0.0016	4.9e-11
Body fat percentage	rs6840236	4:56289785	C	T	0.4649	0.0121	0.0015	4.3e-15
Body fat percentage	rs6843910	4:83150787	A	T	0.4545	-0.0104	0.0016	1.9e-11
Body fat percentage	rs6847975	4:80812960	A	G	0.3562	0.0114	0.0016	2.1e-12
Body fat percentage	rs685149	11:57657413	G	A	0.6454	-0.0095	0.0016	3.4e-09
Body fat percentage	rs6875585	5:95593462	C	A	0.6704	0.0112	0.0016	9.6e-12
Body fat percentage	rs6927268	6:108865663	G	T	0.2063	-0.0139	0.0019	3.2e-13
Body fat percentage	rs6948959	7:50697051	A	G	0.7444	-0.0106	0.0018	2.6e-09
Body fat percentage	rs6973656	7:77422583	G	A	0.397	0.0093	0.0016	3.7e-09
Body fat percentage	rs6977416	7:150542711	A	G	0.3342	-0.0118	0.0016	7.6e-13
Body fat percentage	rs7020	20:25278600	A	G	0.4375	0.0131	0.0016	4.5e-17
Body fat percentage	rs7027304	9:129408290	T	C	0.6527	0.0116	0.0016	1.1e-12
Body fat percentage	rs704061	12:89771903	C	T	0.455	0.0137	0.0015	9.1e-19
Body fat percentage	rs7046679	9:124638934	G	C	0.6785	-0.0091	0.0017	3.2e-08
Body fat percentage	rs7124681	11:47529947	A	C	0.4084	0.0223	0.0016	6.6e-46
Body fat percentage	rs7132908	12:50263148	A	G	0.3845	0.0197	0.0016	1.5e-35
Body fat percentage	rs7133378	12:124409502	A	G	0.3194	0.0186	0.0017	3.3e-29
Body fat percentage	rs71658797	1:77967507	A	T	0.1207	0.0236	0.0024	1.7e-23
Body fat percentage	rs719802	11:113234679	C	T	0.6144	-0.0115	0.0016	3.1e-13
Body fat percentage	rs7206608	16:82872628	G	C	0.3216	0.0102	0.0017	7.6e-10
Body fat percentage	rs7216121	17:21281663	G	A	0.6263	-0.0109	0.0016	1.3e-11
Body fat percentage	rs7218014	17:65832016	C	T	0.1973	0.0211	0.0019	1.7e-27
Body fat percentage	rs72634814	1:1538046	A	G	0.3455	-0.0129	0.0017	2.5e-14
Body fat percentage	rs72681698	14:51207741	C	T	0.0107	-0.0525	0.0075	2.3e-12
Body fat percentage	rs72697297	14:93069989	C	T	0.1799	-0.0153	0.002	4.5e-14
Body fat percentage	rs72703757	8:144505785	C	G	0.1988	0.0115	0.0019	3.1e-09
Body fat percentage	rs72755233	15:100692953	A	G	0.1115	-0.0163	0.0024	2.7e-11
Body fat percentage	rs72767957	15:99240793	G	A	0.2001	-0.0127	0.0019	5.3e-11
Body fat percentage	rs72803260	16:51806701	G	T	0.085	-0.0156	0.0028	1.8e-08
Body fat percentage	rs72892910	6:50816887	T	G	0.1722	0.0221	0.002	2.3e-27
Body fat percentage	rs72917533	2:175238924	C	T	0.1855	-0.0139	0.002	2.7e-12
Body fat percentage	rs72976986	19:4050424	A	G	0.1902	-0.0171	0.002	6.7e-18
Body fat percentage	rs72995085	6:143193971	C	T	0.177	-0.0118	0.002	6e-09
Body fat percentage	rs7321331	13:31015138	A	G	0.7423	0.0107	0.0018	1.4e-09
Body fat percentage	rs73213501	4:28514830	C	A	0.1718	-0.0153	0.002	8.2e-14
Body fat percentage	rs7357754	9:92207308	G	A	0.5001	0.0116	0.0015	5.9e-14
Body fat percentage	rs74288880	5:59275800	T	C	0.1148	-0.0136	0.0024	2e-08
Body fat percentage	rs7442885	5:87682877	G	C	0.2141	-0.0128	0.0019	9.5e-12
Body fat percentage	rs74576293	12:3351169	C	T	0.0897	-0.0205	0.0027	2.7e-14
Body fat percentage	rs74618095	21:40683196	C	T	0.158	0.0133	0.0021	4.9e-10
Body fat percentage	rs7463186	8:87517201	G	A	0.516	0.0088	0.0015	1.1e-08
Body fat percentage	rs75135487	3:185805294	G	C	0.1369	-0.0144	0.0022	1.1e-10
Body fat percentage	rs7535438	1:42635359	A	C	0.2909	-0.0095	0.0017	2.1e-08
Body fat percentage	rs75412871	12:121709430	T	C	0.0519	-0.0216	0.0035	5e-10
Body fat percentage	rs7575523	2:59335104	G	T	0.6032	-0.0154	0.0016	1.7e-22
Body fat percentage	rs7598246	2:172866359	C	T	0.5837	0.0085	0.0016	4.4e-08
Body fat percentage	rs76115890	13:91993627	C	T	0.1179	-0.0139	0.0024	8.6e-09
Body fat percentage	rs76345589	3:84185140	G	C	0.0675	-0.0199	0.0031	1.1e-10
Body fat percentage	rs7680610	4:24118165	G	A	0.6522	0.009	0.0016	3.7e-08
Body fat percentage	rs76856798	1:243922215	T	C	0.0185	0.0322	0.0057	1.9e-08
Body fat percentage	rs7704382	5:112448114	G	C	0.4334	0.0102	0.0016	6.4e-11
Body fat percentage	rs7707394	5:74472939	A	G	0.3573	-0.0127	0.0016	3.1e-15
Body fat percentage	rs7762794	6:153380228	G	A	0.2855	0.0093	0.0017	4.8e-08
Body fat percentage	rs7773916	6:70339118	T	C	0.2131	-0.0109	0.0019	6.2e-09
Body fat percentage	rs7789056	7:112908269	A	G	0.563	-0.0127	0.0016	2.9e-16
Body fat percentage	rs7796825	7:14317417	A	G	0.8258	0.0113	0.002	2.8e-08
Body fat percentage	rs78296744	12:122479308	A	G	0.2723	-0.0133	0.0017	1.8e-14
Body fat percentage	rs7843109	8:112360702	T	C	0.6887	0.0104	0.0017	5.2e-10
Body fat percentage	rs78744936	17:7461343	A	G	0.266	0.0113	0.0018	1.1e-10
Body fat percentage	rs7893571	10:16750129	T	G	0.6659	0.01	0.0016	9.2e-10
Body fat percentage	rs7925725	11:131449365	C	A	0.4112	0.0112	0.0016	1.1e-12
Body fat percentage	rs7942368	11:76465362	T	C	0.2175	-0.0105	0.0019	2.6e-08
Body fat percentage	rs79518326	1:174946883	A	C	0.0286	-0.0322	0.0047	5e-12
Body fat percentage	rs7960609	12:18161569	G	A	0.3269	0.0092	0.0016	2.5e-08
Body fat percentage	rs7966251	12:103731395	A	G	0.255	-0.0098	0.0018	3e-08
Body fat percentage	rs7972728	12:123076778	A	C	0.7377	0.0168	0.0018	1.2e-21
Body fat percentage	rs7975187	12:60964108	G	A	0.2139	0.0115	0.0019	8.8e-10
Body fat percentage	rs798549	7:2760750	A	C	0.7308	-0.0099	0.0017	1.3e-08
Body fat percentage	rs7987928	13:54372377	A	G	0.7999	-0.0138	0.0019	8.5e-13
Body fat percentage	rs8096564	18:39910592	T	G	0.2981	0.0107	0.0017	2.4e-10
Body fat percentage	rs811054	16:72251132	T	C	0.5373	0.0095	0.0016	8.7e-10
Body fat percentage	rs812949	5:170506141	C	T	0.7292	0.0134	0.0017	1.3e-14
Body fat percentage	rs815163	1:190294726	C	T	0.5632	-0.0091	0.0015	4.4e-09
Body fat percentage	rs843901	20:32904636	G	T	0.9364	0.0195	0.0032	7.5e-10
Body fat percentage	rs853961	6:127003464	T	G	0.5059	0.0122	0.0015	2.3e-15
Body fat percentage	rs879620	16:4015729	T	C	0.6133	0.0147	0.0016	1.9e-20
Body fat percentage	rs881929	16:31079371	T	G	0.3754	-0.0147	0.0016	2.1e-20
Body fat percentage	rs885114	11:8678756	A	G	0.2756	-0.0146	0.0017	2.5e-17
Body fat percentage	rs9289630	3:141178670	C	G	0.3891	0.0124	0.0016	5.6e-15
Body fat percentage	rs9304665	19:47602577	A	T	0.7636	0.0119	0.0018	6.9e-11
Body fat percentage	rs9321191	6:130165691	C	T	0.1994	-0.0109	0.0019	1.7e-08
Body fat percentage	rs9372414	6:97764299	T	C	0.3476	-0.0093	0.0016	8.7e-09
Body fat percentage	rs9389857	6:141372966	T	C	0.0524	0.0198	0.0035	1.1e-08
Body fat percentage	rs9568867	13:54107352	A	G	0.1292	0.0193	0.0023	7.3e-17
Body fat percentage	rs957919	3:131629716	T	C	0.278	0.0139	0.0017	6.4e-16
Body fat percentage	rs9645335	1:194969572	T	C	0.3678	-0.0096	0.0016	2e-09
Body fat percentage	rs972283	7:130466854	G	A	0.5119	-0.0143	0.0015	1.5e-20
Body fat percentage	rs9788550	14:29681138	C	G	0.2475	-0.0158	0.0018	1.1e-18
Body fat percentage	rs9814758	3:123062657	G	T	0.3558	-0.0136	0.0016	3.8e-17
Body fat percentage	rs9843653	3:49920571	C	T	0.5115	0.0168	0.0015	1.3e-27
Body fat percentage	rs9865173	3:44016658	A	T	0.7032	-0.012	0.0017	1.1e-12
Body fat percentage	rs9892466	17:3969527	A	T	0.3333	0.0101	0.0016	8e-10
Body fat percentage	rs9955276	18:1839339	T	C	0.1444	0.0128	0.0022	7.4e-09
Body fat percentage	rs998584	6:43757896	A	C	0.4829	-0.0094	0.0015	1.2e-09
Trunk fat percentage	rs10050620	5:63927239	T	C	0.3254	-0.0124	0.002	3.8e-10
Trunk fat percentage	rs10099330	8:143383694	G	A	0.4529	0.0107	0.0019	9e-09
Trunk fat percentage	rs10100245	8:77226919	A	G	0.5645	0.0184	0.0019	7.9e-23
Trunk fat percentage	rs10116857	9:16595649	A	C	0.0618	-0.0265	0.0038	5.3e-12
Trunk fat percentage	rs10146997	14:79945162	G	A	0.2219	0.0212	0.0022	2.3e-21
Trunk fat percentage	rs10172196	2:36780549	A	G	0.3055	0.0174	0.002	4.9e-18
Trunk fat percentage	rs1020048	9:86666993	C	A	0.8091	-0.0137	0.0024	9.5e-09
Trunk fat percentage	rs10210468	2:165377103	C	T	0.4644	-0.0113	0.0019	1.8e-09
Trunk fat percentage	rs10278040	7:99141373	A	G	0.0598	-0.0215	0.0039	3.8e-08
Trunk fat percentage	rs1042317	6:20492995	C	T	0.6793	-0.0144	0.002	4.6e-13
Trunk fat percentage	rs10423928	19:46182304	A	T	0.1944	-0.0251	0.0023	5.6e-27
Trunk fat percentage	rs10510025	10:118650996	T	C	0.2471	0.0142	0.0022	4.3e-11
Trunk fat percentage	rs10518707	15:67365622	G	A	0.4634	0.0139	0.0019	7.6e-14
Trunk fat percentage	rs1056441	20:62370349	C	T	0.6753	0.0141	0.002	9.9e-13
Trunk fat percentage	rs10746056	12:79526915	C	G	0.4717	0.011	0.0019	2.6e-09
Trunk fat percentage	rs10756798	9:16739763	T	C	0.6424	-0.0164	0.0019	2.4e-17
Trunk fat percentage	rs10788497	10:88127995	C	G	0.4996	0.0117	0.0019	2.7e-10
Trunk fat percentage	rs10795422	10:16759312	G	A	0.6902	0.0117	0.002	4.7e-09
Trunk fat percentage	rs10799319	1:225703485	G	A	0.705	-0.0121	0.002	2.2e-09
Trunk fat percentage	rs10854853	22:48874412	T	G	0.4568	0.0119	0.0019	1.4e-10
Trunk fat percentage	rs1086103	4:145920099	A	C	0.0458	-0.0289	0.0044	6.9e-11
Trunk fat percentage	rs10938397	4:45182527	G	A	0.4343	0.023	0.0019	7e-35
Trunk fat percentage	rs10959841	9:11469190	C	T	0.3874	-0.0105	0.0019	3.6e-08
Trunk fat percentage	rs10982576	9:117920248	C	T	0.2395	-0.013	0.0022	2.4e-09
Trunk fat percentage	rs10999460	10:72428283	T	C	0.2655	0.0218	0.0021	4.9e-25
Trunk fat percentage	rs1100237	7:77606013	C	T	0.6001	-0.0114	0.0019	1.6e-09
Trunk fat percentage	rs1101152	20:17106047	A	G	0.7591	-0.012	0.0022	3.4e-08
Trunk fat percentage	rs11022718	11:13268144	T	C	0.203	-0.0134	0.0023	7.3e-09
Trunk fat percentage	rs11030016	11:27487992	T	C	0.7398	0.0151	0.0021	1.1e-12
Trunk fat percentage	rs11030108	11:27695464	G	A	0.68	-0.0204	0.002	6.5e-25
Trunk fat percentage	rs11045172	12:20470221	C	A	0.1979	0.0132	0.0023	1.5e-08
Trunk fat percentage	rs1106761	8:142619234	A	G	0.384	0.0123	0.0019	2e-10
Trunk fat percentage	rs11079849	17:47090785	T	C	0.3286	-0.0136	0.002	6.1e-12
Trunk fat percentage	rs11080884	18:1659101	A	G	0.6448	-0.0116	0.0019	1.9e-09
Trunk fat percentage	rs11105842	12:91243910	A	G	0.3675	-0.012	0.0019	5.5e-10
Trunk fat percentage	rs11119208	1:209211968	G	A	0.6149	-0.0106	0.0019	2.3e-08
Trunk fat percentage	rs11122450	1:230301811	G	T	0.6117	-0.0118	0.0019	5e-10
Trunk fat percentage	rs11135450	5:95554016	G	A	0.6689	0.0134	0.002	1.2e-11
Trunk fat percentage	rs11150745	17:78757626	G	A	0.3177	-0.014	0.002	1.8e-12
Trunk fat percentage	rs11156614	14:30092001	A	G	0.5913	-0.0117	0.0019	6.3e-10
Trunk fat percentage	rs11159110	14:75392298	T	C	0.1428	-0.0154	0.0027	6.8e-09
Trunk fat percentage	rs11165643	1:96924097	T	C	0.5901	0.0173	0.0019	2.8e-20
Trunk fat percentage	rs11205303	1:149906413	C	T	0.4066	0.029	0.0019	1.8e-53
Trunk fat percentage	rs11208779	1:66417145	C	G	0.5289	0.0119	0.0019	1.5e-10
Trunk fat percentage	rs11222371	11:130745719	T	C	0.4092	0.0148	0.0019	3.2e-15
Trunk fat percentage	rs11241192	5:112447066	T	C	0.434	0.0118	0.0019	3.4e-10
Trunk fat percentage	rs112710809	4:73550401	T	C	0.0635	0.0314	0.0038	3e-16
Trunk fat percentage	rs112852122	20:47498117	A	G	0.1578	-0.0178	0.0026	4.7e-12
Trunk fat percentage	rs113848804	12:121708488	A	G	0.0509	-0.0263	0.0042	4.1e-10
Trunk fat percentage	rs11538	22:18220831	G	A	0.1718	0.014	0.0025	1.2e-08
Trunk fat percentage	rs11549690	11:63991581	A	G	0.076	-0.0204	0.0035	4.7e-09
Trunk fat percentage	rs11619393	13:20262266	C	T	0.145	0.0168	0.0026	2e-10
Trunk fat percentage	rs11659979	18:13157049	A	G	0.2617	0.0124	0.0021	3.6e-09
Trunk fat percentage	rs11664106	18:2846812	T	A	0.3739	0.0142	0.002	5.5e-13
Trunk fat percentage	rs11664848	18:42575661	G	C	0.6596	0.0118	0.002	1.6e-09
Trunk fat percentage	rs11666808	19:18383506	C	T	0.6253	-0.0226	0.0019	7.8e-32
Trunk fat percentage	rs117642733	17:21284910	T	C	0.0453	0.0273	0.0047	7.2e-09
Trunk fat percentage	rs11782341	8:4813459	G	A	0.1888	0.0139	0.0024	6.1e-09
Trunk fat percentage	rs11786089	8:21975521	G	A	0.4597	0.0139	0.0019	9.7e-14
Trunk fat percentage	rs11790018	9:129702842	G	C	0.3675	-0.0141	0.0019	2.6e-13
Trunk fat percentage	rs1182199	7:2862542	A	C	0.3044	-0.0168	0.002	6.3e-17
Trunk fat percentage	rs11856579	15:78012688	A	G	0.2674	-0.0115	0.0021	4.1e-08
Trunk fat percentage	rs11866219	16:69549749	C	A	0.5838	-0.0185	0.0019	2.8e-22
Trunk fat percentage	rs12042959	1:243533273	G	A	0.1439	-0.0163	0.0026	6.3e-10
Trunk fat percentage	rs12072739	1:98315893	G	A	0.2246	0.0159	0.0022	6.8e-13
Trunk fat percentage	rs12124748	1:35837945	T	A	0.0118	0.0513	0.0087	3.8e-09
Trunk fat percentage	rs1218822	13:28011963	A	G	0.6614	0.0121	0.002	6.1e-10
Trunk fat percentage	rs12204724	6:116532430	T	C	0.3023	0.0129	0.002	1.6e-10
Trunk fat percentage	rs12218858	10:126474200	T	C	0.5736	0.0123	0.0019	4.3e-11
Trunk fat percentage	rs12251016	10:21821918	T	A	0.3443	0.0184	0.0019	3.3e-21
Trunk fat percentage	rs12402939	1:150615094	C	A	0.3924	-0.0123	0.0019	7.7e-11
Trunk fat percentage	rs12441543	15:31689543	A	G	0.2871	0.0141	0.0021	6e-12
Trunk fat percentage	rs12475388	2:27039792	A	G	0.4857	-0.0122	0.0019	4.2e-11
Trunk fat percentage	rs12530737	7:71439807	C	T	0.2617	-0.0124	0.0021	3.8e-09
Trunk fat percentage	rs12533489	7:19016933	C	G	0.157	-0.0145	0.0026	1.5e-08
Trunk fat percentage	rs12562784	1:11927364	G	A	0.1121	0.0175	0.0029	2.5e-09
Trunk fat percentage	rs12601535	17:27441077	G	C	0.5058	-0.0104	0.0019	2.2e-08
Trunk fat percentage	rs12722976	1:103345744	G	C	0.4999	-0.011	0.0019	3e-09
Trunk fat percentage	rs12724928	1:113128931	C	T	0.2049	-0.0193	0.0023	3.4e-17
Trunk fat percentage	rs12890931	14:69753369	G	T	0.3624	0.0136	0.0019	2.1e-12
Trunk fat percentage	rs12926311	16:406427	C	G	0.3535	-0.0106	0.0019	4.5e-08
Trunk fat percentage	rs12997625	2:202970250	T	C	0.5261	0.0119	0.0019	1.6e-10
Trunk fat percentage	rs13084418	3:25316314	A	G	0.1298	-0.0185	0.0028	1.6e-11
Trunk fat percentage	rs13106087	4:145566864	C	T	0.8298	0.0144	0.0025	4.3e-09
Trunk fat percentage	rs13132853	4:38680015	G	A	0.3602	-0.0107	0.0019	2.9e-08
Trunk fat percentage	rs13174863	5:139080745	G	A	0.1481	0.0156	0.0026	3e-09
Trunk fat percentage	rs13292699	9:15910044	C	A	0.4337	-0.0228	0.0019	3.3e-34
Trunk fat percentage	rs1329733	9:92208227	G	A	0.475	0.0131	0.0019	2.1e-12
Trunk fat percentage	rs13389219	2:165528876	T	C	0.3924	0.0222	0.0019	6.3e-32
Trunk fat percentage	rs13408397	2:69582028	T	C	0.4111	-0.0165	0.0019	1.3e-18
Trunk fat percentage	rs1358980	6:43764551	T	C	0.4834	-0.0129	0.0019	4.6e-12
Trunk fat percentage	rs13598	15:48702457	A	C	0.873	0.0162	0.0028	6e-09
Trunk fat percentage	rs1377184	1:215246432	T	A	0.7489	0.0164	0.0021	1.6e-14
Trunk fat percentage	rs1421334	8:30865733	C	A	0.5489	-0.0127	0.0019	1.3e-11
Trunk fat percentage	rs1441264	13:79580919	A	G	0.5937	0.0132	0.0019	6.3e-12
Trunk fat percentage	rs1453055	2:181329491	A	G	0.2734	0.0149	0.0021	9.2e-13
Trunk fat percentage	rs1454687	3:94038085	G	C	0.5153	-0.015	0.0018	5e-16
Trunk fat percentage	rs1475860	21:18085482	C	G	0.5054	0.0108	0.0019	6.9e-09
Trunk fat percentage	rs1526579	12:18186262	C	T	0.3305	0.0118	0.002	2e-09
Trunk fat percentage	rs1568488	3:153657951	C	G	0.5948	0.0142	0.0019	8.6e-14
Trunk fat percentage	rs1605898	11:85168172	A	T	0.8376	0.0157	0.0025	4e-10
Trunk fat percentage	rs1624064	6:26378681	C	T	0.4204	-0.0136	0.0019	4.8e-13
Trunk fat percentage	rs1689265	1:29459117	G	A	0.9092	0.0192	0.0032	2.3e-09
Trunk fat percentage	rs16916303	9:30823761	G	A	0.1198	-0.0172	0.0029	2.3e-09
Trunk fat percentage	rs16934748	10:33970319	C	T	0.1503	0.0153	0.0026	3.4e-09
Trunk fat percentage	rs16996657	20:15816236	C	T	0.1278	0.0153	0.0028	3.9e-08
Trunk fat percentage	rs1701839	7:112932883	A	G	0.5488	-0.0144	0.0019	9.4e-15
Trunk fat percentage	rs17024393	1:110154688	C	T	0.0259	0.0568	0.0058	2.2e-22
Trunk fat percentage	rs17055384	13:59285126	T	C	0.183	-0.0141	0.0024	4.7e-09
Trunk fat percentage	rs17055653	5:157918528	A	C	0.3082	0.0181	0.002	1.8e-19
Trunk fat percentage	rs17122891	1:62453523	C	T	0.2216	-0.0124	0.0022	2.5e-08
Trunk fat percentage	rs17172722	7:46620312	T	C	0.419	-0.0127	0.0019	1.4e-11
Trunk fat percentage	rs1724557	4:137094048	A	C	0.5868	-0.0122	0.0019	9.7e-11
Trunk fat percentage	rs17522122	14:33302882	T	G	0.4712	0.014	0.0019	5.3e-14
Trunk fat percentage	rs17639546	3:61251635	A	G	0.1485	-0.0157	0.0026	1.7e-09
Trunk fat percentage	rs17704028	7:95140031	T	C	0.1472	-0.0176	0.0026	1.8e-11
Trunk fat percentage	rs17724992	19:18454825	G	A	0.2678	-0.0153	0.0021	3.2e-13
Trunk fat percentage	rs1775255	6:51243035	T	G	0.4767	0.0107	0.0019	8e-09
Trunk fat percentage	rs17770336	9:28414625	T	C	0.3224	0.017	0.002	8.8e-18
Trunk fat percentage	rs1782508	11:30243795	G	C	0.6555	-0.0109	0.0019	2e-08
Trunk fat percentage	rs1801282	3:12393125	G	C	0.1195	0.0368	0.0028	2.9e-38
Trunk fat percentage	rs1808629	8:73435964	A	G	0.6854	-0.0191	0.002	1.3e-21
Trunk fat percentage	rs1813039	8:76295984	A	G	0.7098	0.0124	0.002	1.5e-09
Trunk fat percentage	rs1859927	2:242022371	C	T	0.1571	0.0144	0.0025	1.3e-08
Trunk fat percentage	rs1861410	2:58933591	T	C	0.5554	-0.0157	0.0019	4.1e-17
Trunk fat percentage	rs1866745	15:67034812	A	G	0.3503	-0.0109	0.0019	2.2e-08
Trunk fat percentage	rs1881505	11:1483177	C	T	0.943	-0.0225	0.004	2.1e-08
Trunk fat percentage	rs1893659	18:21080859	A	C	0.4601	-0.019	0.0019	3.6e-24
Trunk fat percentage	rs1906252	6:98550289	A	C	0.4844	-0.0186	0.0019	1.7e-23
Trunk fat percentage	rs1916039	11:122750426	G	A	0.2527	0.0135	0.0021	3.1e-10
Trunk fat percentage	rs2002023	10:76848524	T	C	0.409	0.0123	0.0019	5.7e-11
Trunk fat percentage	rs2008018	17:61954471	A	G	0.3221	0.0121	0.002	9.6e-10
Trunk fat percentage	rs2008882	11:61019325	G	A	0.1383	0.0154	0.0027	1.2e-08
Trunk fat percentage	rs2034947	17:73863929	C	T	0.2097	0.0141	0.0023	5.8e-10
Trunk fat percentage	rs2043016	2:198146381	T	C	0.3759	0.0135	0.0019	1.4e-12
Trunk fat percentage	rs2058526	16:6705246	G	A	0.7302	0.0116	0.0021	2.9e-08
Trunk fat percentage	rs2062506	12:123084836	G	A	0.7367	0.0204	0.0021	2.9e-22
Trunk fat percentage	rs2108635	12:2159556	G	A	0.3385	0.0111	0.002	1.4e-08
Trunk fat percentage	rs215614	7:32347335	A	G	0.6278	-0.0132	0.0019	5.7e-12
Trunk fat percentage	rs2178899	6:31606756	T	A	0.1288	-0.022	0.0028	1.4e-15
Trunk fat percentage	rs2190788	5:144484261	T	G	0.3197	0.0126	0.002	2.4e-10
Trunk fat percentage	rs2192527	4:18329824	G	A	0.4655	0.0178	0.0019	9.5e-22
Trunk fat percentage	rs2243928	13:111981707	G	C	0.649	-0.0136	0.002	5.2e-12
Trunk fat percentage	rs2253310	6:108888593	G	C	0.6262	0.0124	0.0019	8.3e-11
Trunk fat percentage	rs2274224	10:96039597	C	G	0.4355	-0.0194	0.0019	3e-25
Trunk fat percentage	rs2279178	4:906647	G	A	0.8226	-0.0148	0.0024	1e-09
Trunk fat percentage	rs2291127	3:138122477	T	C	0.1562	-0.0168	0.0025	3.8e-11
Trunk fat percentage	rs2307111	5:75003678	C	T	0.3951	-0.0196	0.0019	3.6e-25
Trunk fat percentage	rs239458	8:37213496	A	G	0.9115	0.021	0.0033	1.7e-10
Trunk fat percentage	rs2447832	5:103933473	T	C	0.4396	0.0129	0.0019	4.9e-12
Trunk fat percentage	rs2460	15:53073084	A	G	0.2626	0.0138	0.0021	6.7e-11
Trunk fat percentage	rs2481899	14:56460686	G	A	0.5512	0.0105	0.0019	2.1e-08
Trunk fat percentage	rs252749	5:77389973	A	G	0.246	-0.0137	0.0021	1.6e-10
Trunk fat percentage	rs253443	5:141793905	A	T	0.1782	-0.0135	0.0024	2.5e-08
Trunk fat percentage	rs256112	5:52880175	A	G	0.7684	-0.0154	0.0022	2.3e-12
Trunk fat percentage	rs262953	3:183467986	A	G	0.626	-0.0122	0.0019	1.5e-10
Trunk fat percentage	rs2678204	1:201800511	G	T	0.3402	0.015	0.0019	1.2e-14
Trunk fat percentage	rs2692741	2:76185292	C	G	0.3672	0.0106	0.0019	4.5e-08
Trunk fat percentage	rs2702123	2:24562699	C	T	0.086	-0.0184	0.0033	2.1e-08
Trunk fat percentage	rs2717609	8:143769252	T	A	0.4661	-0.0124	0.0019	2.9e-11
Trunk fat percentage	rs2731238	12:90559598	T	G	0.0675	-0.0259	0.004	1.4e-10
Trunk fat percentage	rs2737265	8:116667634	G	A	0.2807	-0.021	0.0021	2e-24
Trunk fat percentage	rs2785988	1:219744138	A	C	0.2974	0.0281	0.002	3.9e-44
Trunk fat percentage	rs2802774	1:203527812	A	C	0.5473	0.0138	0.0019	2.7e-13
Trunk fat percentage	rs2814993	6:34618893	A	G	0.1398	0.0331	0.0027	1.5e-35
Trunk fat percentage	rs28375268	16:4949528	T	G	0.6451	-0.0134	0.0019	5.9e-12
Trunk fat percentage	rs2855818	17:42290015	A	G	0.2415	0.02	0.0022	5e-20
Trunk fat percentage	rs28651380	4:34773227	G	A	0.2812	0.0126	0.0021	9.9e-10
Trunk fat percentage	rs2868182	4:82160847	A	G	0.254	0.0126	0.0021	3.3e-09
Trunk fat percentage	rs28742003	15:68127769	T	C	0.2053	-0.0245	0.0023	1.1e-26
Trunk fat percentage	rs2875238	11:130282078	C	T	0.6374	0.0108	0.0019	2.9e-08
Trunk fat percentage	rs2923115	11:10407307	G	A	0.4978	0.0142	0.0019	1.6e-14
Trunk fat percentage	rs2943653	2:227047771	T	C	0.6728	-0.0203	0.002	5.1e-25
Trunk fat percentage	rs2954033	8:126493746	G	A	0.6952	0.0154	0.002	1.7e-14
Trunk fat percentage	rs2960420	3:12314512	G	C	0.3508	-0.0114	0.0019	4.1e-09
Trunk fat percentage	rs2966859	16:85324544	G	A	0.789	-0.014	0.0023	8.7e-10
Trunk fat percentage	rs2984618	1:47690438	T	G	0.4162	0.0132	0.0019	1.7e-12
Trunk fat percentage	rs301808	1:8486341	G	C	0.3398	0.013	0.0019	2.6e-11
Trunk fat percentage	rs3113509	4:52932825	T	C	0.732	-0.013	0.0021	5.3e-10
Trunk fat percentage	rs314288	6:105434078	C	T	0.8862	-0.0229	0.0029	4.1e-15
Trunk fat percentage	rs3213182	20:32263233	C	A	0.1104	0.0179	0.003	1.4e-09
Trunk fat percentage	rs3218036	19:30305684	A	G	0.3264	0.0143	0.002	4.6e-13
Trunk fat percentage	rs34483452	5:87986314	A	C	0.1363	0.028	0.0027	8.2e-25
Trunk fat percentage	rs34580448	5:82810884	C	T	0.0413	-0.0423	0.0047	1.1e-19
Trunk fat percentage	rs34656389	4:96153214	G	A	0.3675	0.0117	0.0019	1.1e-09
Trunk fat percentage	rs34675417	17:28079167	G	A	0.2547	0.0158	0.0021	1.6e-13
Trunk fat percentage	rs34898535	16:31025641	T	C	0.3779	-0.0167	0.0019	2.2e-18
Trunk fat percentage	rs35142762	2:636790	C	T	0.1724	-0.0314	0.0024	1e-37
Trunk fat percentage	rs35154152	1:155172725	C	T	0.1068	-0.025	0.003	6.5e-17
Trunk fat percentage	rs35307904	9:78511889	A	G	0.1224	-0.0199	0.0028	2.2e-12
Trunk fat percentage	rs35523808	6:75834971	A	T	0.0491	0.026	0.0044	3.3e-09
Trunk fat percentage	rs35697691	15:52353498	G	C	0.0894	0.0241	0.0033	2.6e-13
Trunk fat percentage	rs3730071	12:49168798	A	C	0.0302	-0.0318	0.0054	4e-09
Trunk fat percentage	rs3743861	16:89818340	C	G	0.4153	-0.0136	0.0019	4e-13
Trunk fat percentage	rs3754963	2:166185707	T	A	0.2551	-0.0123	0.0021	5.5e-09
Trunk fat percentage	rs3764002	12:108618630	T	C	0.2615	-0.0201	0.0021	1.3e-21
Trunk fat percentage	rs3766823	1:32197257	A	G	0.172	0.0157	0.0024	1.6e-10
Trunk fat percentage	rs3796074	2:42722599	A	G	0.6173	0.012	0.0019	2.9e-10
Trunk fat percentage	rs3803286	14:103246470	G	A	0.6667	-0.0126	0.002	1.3e-10
Trunk fat percentage	rs3817428	15:89415247	G	C	0.265	-0.0227	0.0021	2.8e-27
Trunk fat percentage	rs3826408	17:7101292	T	C	0.4568	0.011	0.0019	3.2e-09
Trunk fat percentage	rs3923501	9:103065884	T	C	0.4758	0.0119	0.0019	1.5e-10
Trunk fat percentage	rs3943933	5:63020327	A	T	0.4807	0.0123	0.0019	2.5e-11
Trunk fat percentage	rs394608	21:46581798	C	T	0.5377	0.014	0.0019	7e-14
Trunk fat percentage	rs40067	5:107439012	A	G	0.1702	-0.0149	0.0025	1.6e-09
Trunk fat percentage	rs41307479	9:116082647	G	C	0.2206	0.0136	0.0022	1.1e-09
Trunk fat percentage	rs41310284	10:102447647	A	C	0.101	-0.0256	0.0031	1.1e-16
Trunk fat percentage	rs41313250	1:62483623	G	A	0.1215	-0.0269	0.0029	2.9e-20
Trunk fat percentage	rs4245812	2:47263851	G	A	0.3644	-0.0111	0.0019	6.8e-09
Trunk fat percentage	rs429343	2:147903382	G	A	0.5766	-0.012	0.0019	1.4e-10
Trunk fat percentage	rs429358	19:45411941	C	T	0.154	-0.0239	0.0026	1.4e-20
Trunk fat percentage	rs4311684	8:112395164	C	T	0.7067	0.0118	0.002	7.1e-09
Trunk fat percentage	rs4377469	3:42303074	T	G	0.8868	0.0169	0.0029	5.8e-09
Trunk fat percentage	rs4398538	4:130724740	C	T	0.6425	-0.0116	0.0019	2.2e-09
Trunk fat percentage	rs441792	2:105404221	G	A	0.4866	0.0143	0.0019	1.1e-14
Trunk fat percentage	rs4466418	8:126323787	A	G	0.5622	0.012	0.0019	1.3e-10
Trunk fat percentage	rs4500770	16:74658430	T	A	0.3626	-0.0116	0.0019	1.6e-09
Trunk fat percentage	rs4549685	7:39326478	T	C	0.3298	-0.0151	0.002	2.1e-14
Trunk fat percentage	rs458741	5:55807837	C	T	0.7431	-0.0173	0.0021	3.9e-16
Trunk fat percentage	rs4616635	3:64702275	G	C	0.2787	0.0161	0.0021	4.7e-15
Trunk fat percentage	rs464881	5:66199011	T	C	0.5453	0.0102	0.0019	4.3e-08
Trunk fat percentage	rs4709745	6:164105984	C	T	0.3072	0.0117	0.002	5.7e-09
Trunk fat percentage	rs4718964	7:70038969	T	G	0.4131	0.013	0.0019	4.8e-12
Trunk fat percentage	rs4721319	7:14334844	G	A	0.8326	0.0144	0.0025	6.9e-09
Trunk fat percentage	rs4722398	7:3125220	T	C	0.1361	0.0174	0.0027	9.1e-11
Trunk fat percentage	rs4759318	12:54420098	T	C	0.3622	0.013	0.0019	1.7e-11
Trunk fat percentage	rs479018	11:66060546	A	G	0.3325	-0.0169	0.002	2.4e-17
Trunk fat percentage	rs4820325	22:38599978	A	G	0.5809	-0.0223	0.0019	2e-32
Trunk fat percentage	rs4880340	10:133989641	G	C	0.5758	-0.0118	0.0019	3e-10
Trunk fat percentage	rs4945884	6:111895860	C	T	0.7096	0.0133	0.002	8.2e-11
Trunk fat percentage	rs4959158	6:1835401	A	G	0.5905	0.0128	0.0019	4.4e-11
Trunk fat percentage	rs529200	3:173114305	G	A	0.5278	0.0112	0.0019	1.3e-09
Trunk fat percentage	rs543874	1:177889480	G	A	0.2053	0.0341	0.0023	2.5e-50
Trunk fat percentage	rs55707359	11:46159333	G	T	0.0154	0.0432	0.0076	1.4e-08
Trunk fat percentage	rs56218501	20:46365636	T	C	0.2118	-0.0157	0.0023	3.7e-12
Trunk fat percentage	rs56254492	3:70920168	T	C	0.3011	0.0117	0.002	7e-09
Trunk fat percentage	rs56299211	10:61320597	A	G	0.1907	0.0133	0.0024	2.9e-08
Trunk fat percentage	rs56399737	13:33381721	T	C	0.4492	-0.0127	0.0019	1.1e-11
Trunk fat percentage	rs57636386	18:58048295	C	T	0.0838	-0.0295	0.0034	1.4e-18
Trunk fat percentage	rs57800857	4:140863365	C	A	0.3649	-0.0148	0.0019	1.9e-14
Trunk fat percentage	rs57989773	6:100629078	C	T	0.2449	0.0143	0.0022	1.1e-10
Trunk fat percentage	rs58862095	7:75081418	T	C	0.4193	-0.014	0.0019	8.9e-14
Trunk fat percentage	rs59397548	12:122468756	G	A	0.3189	-0.0136	0.002	7.4e-12
Trunk fat percentage	rs59499656	18:40768309	T	A	0.3432	-0.0175	0.002	4.6e-19
Trunk fat percentage	rs595127	11:94270825	C	T	0.5698	0.0115	0.0019	7.7e-10
Trunk fat percentage	rs6008598	22:46704243	T	C	0.1071	0.0178	0.003	3.2e-09
Trunk fat percentage	rs60498692	9:81573338	A	C	0.1912	-0.0131	0.0024	2.8e-08
Trunk fat percentage	rs6103254	20:41990761	C	T	0.1267	-0.0163	0.0028	5.9e-09
Trunk fat percentage	rs61412028	6:69970059	A	T	0.1495	0.0151	0.0026	5.8e-09
Trunk fat percentage	rs61903695	11:89922417	G	A	0.2549	0.0138	0.0021	8.8e-11
Trunk fat percentage	rs61910767	11:134515899	T	C	0.1642	-0.0165	0.0025	4.4e-11
Trunk fat percentage	rs61969510	13:86484025	C	T	0.279	0.0153	0.0021	2.2e-13
Trunk fat percentage	rs61975147	14:59416558	C	T	0.1672	-0.0179	0.0025	6.1e-13
Trunk fat percentage	rs61986205	14:41271485	G	A	0.082	0.0225	0.0034	3.9e-11
Trunk fat percentage	rs62025831	15:84545685	C	T	0.2806	-0.0308	0.0021	1.8e-50
Trunk fat percentage	rs62218301	21:36741262	G	A	0.1661	-0.0145	0.0025	6.5e-09
Trunk fat percentage	rs62413414	6:80310375	T	C	0.1517	0.0145	0.0026	1.6e-08
Trunk fat percentage	rs62499697	8:14293020	C	T	0.2927	0.0123	0.0021	2.5e-09
Trunk fat percentage	rs62621197	19:8670147	T	C	0.0372	-0.0425	0.0051	6.3e-17
Trunk fat percentage	rs6436891	2:230623048	G	A	0.33	0.0171	0.002	3.5e-18
Trunk fat percentage	rs6438086	3:112359986	G	A	0.648	-0.0106	0.0019	4.3e-08
Trunk fat percentage	rs6466053	7:104923929	T	C	0.6552	-0.0119	0.0019	1.1e-09
Trunk fat percentage	rs6491427	13:99113166	G	A	0.289	-0.0158	0.002	1e-14
Trunk fat percentage	rs6500594	16:4316498	G	T	0.2466	0.0137	0.0022	2.2e-10
Trunk fat percentage	rs6561937	13:58257667	A	T	0.7537	-0.0122	0.0022	1.4e-08
Trunk fat percentage	rs6575340	14:94023972	A	G	0.636	0.0152	0.0019	2.9e-15
Trunk fat percentage	rs6688826	1:80812329	C	T	0.2982	0.012	0.002	3e-09
Trunk fat percentage	rs6693294	1:49879122	G	A	0.6886	-0.0154	0.002	9.9e-15
Trunk fat percentage	rs6699744	1:72825144	T	A	0.6161	0.0146	0.0019	1.9e-14
Trunk fat percentage	rs6711390	2:135629439	T	C	0.3713	-0.0142	0.0019	6.8e-14
Trunk fat percentage	rs6735393	2:56190273	C	A	0.1805	0.0148	0.0024	8.3e-10
Trunk fat percentage	rs6752378	2:25150116	A	C	0.4863	0.0236	0.0018	2.8e-37
Trunk fat percentage	rs6754292	2:217614584	T	C	0.6446	-0.0122	0.0019	3.9e-10
Trunk fat percentage	rs6777968	3:157857972	A	G	0.5602	-0.011	0.0019	3.2e-09
Trunk fat percentage	rs6782581	3:196979106	G	C	0.4393	-0.0119	0.0019	1.5e-10
Trunk fat percentage	rs6791296	3:62431415	C	T	0.8819	0.0177	0.0029	7.1e-10
Trunk fat percentage	rs6840236	4:56289785	C	T	0.4649	0.0155	0.0019	7.6e-17
Trunk fat percentage	rs6843910	4:83150787	A	T	0.4545	-0.0124	0.0019	2.8e-11
Trunk fat percentage	rs6847975	4:80812960	A	G	0.3562	0.0137	0.0019	1.6e-12
Trunk fat percentage	rs685149	11:57657413	G	A	0.6454	-0.0117	0.0019	1.4e-09
Trunk fat percentage	rs6875133	5:179066078	C	G	0.2535	-0.0123	0.0022	2.1e-08
Trunk fat percentage	rs6948959	7:50697051	A	G	0.7444	-0.0155	0.0021	4e-13
Trunk fat percentage	rs6950442	7:114412664	G	A	0.7998	0.0139	0.0023	2e-09
Trunk fat percentage	rs6973700	7:1856669	G	A	0.2062	-0.0135	0.0023	3.7e-09
Trunk fat percentage	rs6977416	7:150542711	A	G	0.3343	-0.0134	0.002	1.3e-11
Trunk fat percentage	rs7020	20:25278600	A	G	0.4374	0.0163	0.0019	2.6e-18
Trunk fat percentage	rs704061	12:89771903	C	T	0.4551	0.0167	0.0019	2.7e-19
Trunk fat percentage	rs704255	3:71669656	A	G	0.4172	-0.0124	0.0019	4.2e-11
Trunk fat percentage	rs7102705	11:69143284	G	A	0.7966	0.0144	0.0023	4e-10
Trunk fat percentage	rs7124681	11:47529947	A	C	0.4084	0.0262	0.0019	4.1e-44
Trunk fat percentage	rs7132908	12:50263148	A	G	0.3844	0.023	0.0019	1.1e-33
Trunk fat percentage	rs7133378	12:124409502	A	G	0.3194	0.0238	0.002	4.8e-33
Trunk fat percentage	rs71476581	15:32366148	A	G	0.0229	0.0359	0.0063	1.1e-08
Trunk fat percentage	rs7151700	14:101998986	A	C	0.4575	-0.0103	0.0019	2.8e-08
Trunk fat percentage	rs71658797	1:77967507	A	T	0.1207	0.0294	0.0028	4e-25
Trunk fat percentage	rs7171864	15:73227249	A	G	0.6601	0.0165	0.002	4.7e-17
Trunk fat percentage	rs718609	1:190307072	A	G	0.2738	0.0119	0.0021	8.9e-09
Trunk fat percentage	rs718947	10:126739149	G	A	0.361	0.0111	0.002	1.9e-08
Trunk fat percentage	rs719802	11:113234679	C	T	0.6144	-0.0133	0.0019	2.9e-12
Trunk fat percentage	rs7206608	16:82872628	G	C	0.3216	0.0112	0.002	1.6e-08
Trunk fat percentage	rs7218014	17:65832016	C	T	0.1973	0.0258	0.0023	1.5e-28
Trunk fat percentage	rs72617140	2:229019109	C	A	0.2139	0.015	0.0023	2.5e-11
Trunk fat percentage	rs72634814	1:1538046	A	G	0.3455	-0.0147	0.002	4.5e-13
Trunk fat percentage	rs72681698	14:51207741	C	T	0.0107	-0.0577	0.009	1.4e-10
Trunk fat percentage	rs72697297	14:93069989	C	T	0.1799	-0.0183	0.0024	6.9e-14
Trunk fat percentage	rs72755233	15:100692953	A	G	0.1115	-0.0259	0.0029	1.4e-18
Trunk fat percentage	rs72767957	15:99240793	G	A	0.2001	-0.0149	0.0023	1.3e-10
Trunk fat percentage	rs72892910	6:50816887	T	G	0.1722	0.0242	0.0025	5.1e-23
Trunk fat percentage	rs72917533	2:175238924	C	T	0.1855	-0.0165	0.0024	4e-12
Trunk fat percentage	rs7295386	12:51220897	G	C	0.3549	-0.0109	0.0019	2e-08
Trunk fat percentage	rs72976986	19:4050424	A	G	0.1902	-0.0189	0.0024	2.4e-15
Trunk fat percentage	rs72995085	6:143193971	C	T	0.177	-0.0152	0.0024	4e-10
Trunk fat percentage	rs73213501	4:28514830	C	A	0.1718	-0.0177	0.0025	5.2e-13
Trunk fat percentage	rs73374119	18:1894783	G	A	0.1444	0.0145	0.0026	3.9e-08
Trunk fat percentage	rs7426945	3:30071380	G	A	0.5465	0.0114	0.0019	9.1e-10
Trunk fat percentage	rs7442885	5:87682877	G	C	0.2141	-0.0126	0.0023	2.1e-08
Trunk fat percentage	rs74576293	12:3351169	C	T	0.0897	-0.0225	0.0032	3.7e-12
Trunk fat percentage	rs74618095	21:40683196	C	T	0.158	0.0155	0.0026	1.5e-09
Trunk fat percentage	rs7477105	10:131313824	T	C	0.3286	-0.0116	0.002	5.2e-09
Trunk fat percentage	rs75135487	3:185805294	G	C	0.1369	-0.0152	0.0027	1.4e-08
Trunk fat percentage	rs7575523	2:59335104	G	T	0.6032	-0.0177	0.0019	1.2e-20
Trunk fat percentage	rs7589069	2:80640417	G	C	0.1195	0.0156	0.0028	4e-08
Trunk fat percentage	rs7598246	2:172866359	C	T	0.5837	0.0104	0.0019	3.2e-08
Trunk fat percentage	rs7604537	2:205375209	A	T	0.956	-0.027	0.0045	2.2e-09
Trunk fat percentage	rs76345589	3:84185140	G	C	0.0675	-0.0223	0.0037	1.6e-09
Trunk fat percentage	rs7637852	3:44041777	G	A	0.7039	-0.0136	0.002	1.6e-11
Trunk fat percentage	rs764729	2:161126732	C	A	0.728	0.0117	0.0021	1.9e-08
Trunk fat percentage	rs7680610	4:24118165	G	A	0.6523	0.0108	0.002	3.1e-08
Trunk fat percentage	rs7707394	5:74472939	A	G	0.3573	-0.0142	0.0019	1.9e-13
Trunk fat percentage	rs7715639	5:51158351	A	G	0.3672	-0.0118	0.0019	8.9e-10
Trunk fat percentage	rs77165542	2:430975	T	C	0.0355	-0.056	0.005	1.3e-28
Trunk fat percentage	rs7762794	6:153380228	G	A	0.2855	0.0112	0.002	4.5e-08
Trunk fat percentage	rs7826247	8:23398235	G	C	0.2501	-0.0124	0.0021	6.1e-09
Trunk fat percentage	rs78744936	17:7461343	A	G	0.266	0.0142	0.0021	1.5e-11
Trunk fat percentage	rs7906395	10:103070240	G	A	0.2304	-0.0123	0.0022	2e-08
Trunk fat percentage	rs7925725	11:131449365	C	A	0.4113	0.0125	0.0019	3.6e-11
Trunk fat percentage	rs79518326	1:174946883	A	C	0.0286	-0.0394	0.0056	2e-12
Trunk fat percentage	rs7975187	12:60964108	G	A	0.2139	0.0128	0.0023	1.4e-08
Trunk fat percentage	rs8049439	16:28837515	C	T	0.4023	0.0296	0.0019	1.5e-55
Trunk fat percentage	rs8051058	16:24699511	C	T	0.7553	0.0149	0.0022	5.6e-12
Trunk fat percentage	rs8059064	16:51797169	T	G	0.0853	-0.0193	0.0033	5.9e-09
Trunk fat percentage	rs8090017	18:39911991	A	G	0.3345	0.0131	0.002	3.7e-11
Trunk fat percentage	rs8103728	19:33900257	G	C	0.67	0.0227	0.002	1.6e-30
Trunk fat percentage	rs811054	16:72251132	T	C	0.5373	0.0111	0.0019	2.6e-09
Trunk fat percentage	rs812949	5:170506141	C	T	0.7292	0.0161	0.0021	1.2e-14
Trunk fat percentage	rs8139212	22:42326181	A	G	0.1165	0.0168	0.0029	6.3e-09
Trunk fat percentage	rs8176166	17:41240277	C	T	0.1487	-0.0145	0.0026	2.9e-08
Trunk fat percentage	rs8180470	5:119388744	T	C	0.5348	-0.011	0.0019	3.5e-09
Trunk fat percentage	rs879620	16:4015729	T	C	0.6133	0.0173	0.0019	9.2e-20
Trunk fat percentage	rs885114	11:8678756	A	G	0.2756	-0.0171	0.0021	1.6e-16
Trunk fat percentage	rs890796	5:153551022	A	C	0.2991	0.0122	0.002	1.5e-09
Trunk fat percentage	rs9289630	3:141178670	C	G	0.3891	0.0175	0.0019	3.9e-20
Trunk fat percentage	rs9289981	3:99868104	T	A	0.4017	0.0113	0.0019	1.8e-09
Trunk fat percentage	rs9304665	19:47602577	A	T	0.7636	0.0133	0.0022	1.3e-09
Trunk fat percentage	rs9316661	13:54354615	C	T	0.8014	-0.0172	0.0023	1.6e-13
Trunk fat percentage	rs9375441	6:126778600	A	G	0.4557	-0.0132	0.0019	1e-12
Trunk fat percentage	rs9382464	6:55085834	G	A	0.2558	-0.0121	0.0021	1.2e-08
Trunk fat percentage	rs9568867	13:54107352	A	G	0.1292	0.0229	0.0028	2e-16
Trunk fat percentage	rs957919	3:131629716	T	C	0.278	0.0156	0.0021	3.4e-14
Trunk fat percentage	rs9654453	5:299621	C	T	0.1293	0.0151	0.0028	4.4e-08
Trunk fat percentage	rs9657704	9:136942560	A	T	0.3311	-0.0111	0.002	1.8e-08
Trunk fat percentage	rs972283	7:130466854	G	A	0.5119	-0.0172	0.0018	1.7e-20
Trunk fat percentage	rs9770544	7:27232126	G	C	0.8203	-0.019	0.0024	5.4e-15
Trunk fat percentage	rs9783304	11:43660255	T	G	0.6893	-0.0196	0.002	1e-22
Trunk fat percentage	rs9788550	14:29681138	C	G	0.2475	-0.0181	0.0022	5.1e-17
Trunk fat percentage	rs9814758	3:123062657	G	T	0.3558	-0.0159	0.0019	2.7e-16
Trunk fat percentage	rs9843653	3:49920571	C	T	0.5115	0.018	0.0018	1.9e-22
Trunk fat percentage	rs9859077	3:101136402	C	G	0.3389	-0.0119	0.002	1.2e-09
Trunk fat percentage	rs987469	4:89706643	G	C	0.4636	-0.0159	0.0019	1.1e-17
Trunk fat percentage	rs9892466	17:3969527	A	T	0.3333	0.0122	0.002	4.7e-10
Arm fat percentage (left)	rs10050620	5:63927239	T	C	0.3254	-0.0116	0.0016	8.4e-13
Arm fat percentage (left)	rs10070510	5:128014834	C	T	0.1052	-0.0138	0.0025	3.6e-08
Arm fat percentage (left)	rs10099330	8:143383694	G	A	0.4529	0.0088	0.0015	8.2e-09
Arm fat percentage (left)	rs10100245	8:77226919	A	G	0.5645	0.0168	0.0015	8.5e-28
Arm fat percentage (left)	rs10116857	9:16595649	A	C	0.0618	-0.0224	0.0032	1.6e-12
Arm fat percentage (left)	rs1013402	11:27712381	G	A	0.3184	0.0206	0.0016	1.9e-36
Arm fat percentage (left)	rs10144067	14:93885198	T	C	0.5913	0.0112	0.0016	6.2e-13
Arm fat percentage (left)	rs10187101	2:50742227	T	C	0.3636	-0.0107	0.0016	1.2e-11
Arm fat percentage (left)	rs10195099	2:187118965	G	T	0.1543	-0.0117	0.0021	2.7e-08
Arm fat percentage (left)	rs1023229	13:20270925	A	G	0.8539	-0.012	0.0022	2.7e-08
Arm fat percentage (left)	rs10269783	7:49616203	A	G	0.3879	0.0086	0.0016	3.8e-08
Arm fat percentage (left)	rs1038088	17:28074563	G	T	0.5193	0.012	0.0015	2.8e-15
Arm fat percentage (left)	rs10402950	19:33935675	C	T	0.2894	0.0161	0.0017	1e-21
Arm fat percentage (left)	rs10423928	19:46182304	A	T	0.1944	-0.0225	0.0019	1.2e-31
Arm fat percentage (left)	rs1046080	6:31595882	A	C	0.7216	0.0162	0.0017	8.6e-22
Arm fat percentage (left)	rs1048013	2:204154552	T	C	0.5555	0.0092	0.0015	1.7e-09
Arm fat percentage (left)	rs10513935	18:1660497	A	G	0.3015	-0.0096	0.0017	8.2e-09
Arm fat percentage (left)	rs10756792	9:16726119	T	C	0.7431	-0.0157	0.0017	2.8e-19
Arm fat percentage (left)	rs10760724	9:103085144	C	T	0.4773	0.0107	0.0015	2.3e-12
Arm fat percentage (left)	rs10783779	12:56491880	G	T	0.403	-0.0087	0.0016	2e-08
Arm fat percentage (left)	rs1078455	3:108129348	C	T	0.3095	0.0108	0.0017	6.8e-11
Arm fat percentage (left)	rs10788497	10:88127995	C	G	0.4996	0.0102	0.0015	1.8e-11
Arm fat percentage (left)	rs10854853	22:48874412	T	G	0.4568	0.0095	0.0015	5e-10
Arm fat percentage (left)	rs10892501	11:119818622	A	G	0.6071	-0.0095	0.0016	1.4e-09
Arm fat percentage (left)	rs10922199	1:197317238	A	G	0.3293	0.009	0.0016	3.4e-08
Arm fat percentage (left)	rs10938398	4:45186139	A	G	0.4335	0.0212	0.0015	4.3e-43
Arm fat percentage (left)	rs10998	12:122989412	A	G	0.7468	0.0166	0.0018	3.2e-21
Arm fat percentage (left)	rs10999460	10:72428283	T	C	0.2655	0.0126	0.0017	3.7e-13
Arm fat percentage (left)	rs11012732	10:21830104	G	A	0.3317	0.0144	0.0016	4.4e-19
Arm fat percentage (left)	rs11017772	10:132954247	T	C	0.2059	-0.0111	0.0019	4.5e-09
Arm fat percentage (left)	rs11030016	11:27487992	T	C	0.7398	0.013	0.0017	6.4e-14
Arm fat percentage (left)	rs1103804	18:46636411	G	A	0.7669	-0.0108	0.0018	2.3e-09
Arm fat percentage (left)	rs11078687	17:7421672	A	G	0.6136	0.011	0.0016	1.8e-12
Arm fat percentage (left)	rs11079849	17:47090785	T	C	0.3285	-0.0157	0.0016	4.6e-22
Arm fat percentage (left)	rs11105842	12:91243910	A	G	0.3675	-0.0105	0.0016	4e-11
Arm fat percentage (left)	rs11150745	17:78757626	G	A	0.3177	-0.0132	0.0016	6.5e-16
Arm fat percentage (left)	rs11165643	1:96924097	T	C	0.5902	0.0148	0.0015	8.4e-22
Arm fat percentage (left)	rs11172106	12:57512875	G	C	0.4516	0.0086	0.0015	1.9e-08
Arm fat percentage (left)	rs11173522	12:60953472	A	C	0.2143	0.0113	0.0019	1.3e-09
Arm fat percentage (left)	rs11215381	11:115022233	C	T	0.5258	0.0084	0.0015	3.2e-08
Arm fat percentage (left)	rs11222371	11:130745719	T	C	0.4092	0.0125	0.0015	6.7e-16
Arm fat percentage (left)	rs11223970	11:134600370	G	A	0.1646	0.0128	0.0021	5e-10
Arm fat percentage (left)	rs112852122	20:47498117	A	G	0.1579	-0.0175	0.0021	1.7e-16
Arm fat percentage (left)	rs114964326	2:146015229	A	G	0.029	-0.0253	0.0046	2.9e-08
Arm fat percentage (left)	rs11648621	16:19973008	G	A	0.2148	-0.0107	0.0019	9e-09
Arm fat percentage (left)	rs11659979	18:13157049	A	G	0.2618	0.0103	0.0017	2.6e-09
Arm fat percentage (left)	rs11664848	18:42575661	G	C	0.6596	0.0108	0.0016	2e-11
Arm fat percentage (left)	rs11667638	19:1841501	G	A	0.5285	0.0087	0.0015	1e-08
Arm fat percentage (left)	rs11691869	2:100805996	A	C	0.3619	-0.0139	0.0016	1.8e-18
Arm fat percentage (left)	rs11699828	20:62157198	A	G	0.0358	-0.0272	0.0045	1.4e-09
Arm fat percentage (left)	rs117176448	8:27261138	G	C	0.0962	0.0158	0.0026	9.8e-10
Arm fat percentage (left)	rs11767811	7:71620988	A	G	0.1814	-0.0116	0.002	3.9e-09
Arm fat percentage (left)	rs11782074	8:142617096	T	G	0.3836	0.0098	0.0016	8.8e-10
Arm fat percentage (left)	rs11786089	8:21975521	G	A	0.4597	0.0103	0.0015	2e-11
Arm fat percentage (left)	rs118136827	17:2168104	T	G	0.2811	-0.0106	0.0017	3.5e-10
Arm fat percentage (left)	rs11852419	15:41456374	T	A	0.2617	0.0105	0.0017	1.6e-09
Arm fat percentage (left)	rs11866219	16:69549749	C	A	0.5838	-0.0194	0.0016	3.2e-35
Arm fat percentage (left)	rs11967262	6:43760327	G	C	0.4887	-0.0119	0.0015	6.9e-15
Arm fat percentage (left)	rs12001437	9:34074476	C	T	0.3678	0.0093	0.0016	3.9e-09
Arm fat percentage (left)	rs12042959	1:243533273	G	A	0.1439	-0.0134	0.0022	6.5e-10
Arm fat percentage (left)	rs12054057	3:44464535	A	G	0.1576	0.0143	0.0021	7.3e-12
Arm fat percentage (left)	rs12072739	1:98315893	G	A	0.2246	0.0135	0.0018	1.2e-13
Arm fat percentage (left)	rs12088284	1:80798635	T	C	0.3009	0.0095	0.0017	1.1e-08
Arm fat percentage (left)	rs12140153	1:62579891	T	G	0.0943	-0.0254	0.0027	1.8e-21
Arm fat percentage (left)	rs12206087	6:98582900	A	G	0.4824	-0.0146	0.0015	1.2e-21
Arm fat percentage (left)	rs12282785	11:76476030	A	C	0.2158	-0.011	0.0019	4.1e-09
Arm fat percentage (left)	rs12338803	9:116025428	C	A	0.2748	0.0102	0.0017	2.7e-09
Arm fat percentage (left)	rs12367809	12:50256063	T	C	0.3692	0.0218	0.0016	3.4e-43
Arm fat percentage (left)	rs12375196	7:103416541	A	C	0.4243	0.0114	0.0015	1.7e-13
Arm fat percentage (left)	rs12376870	9:117890567	A	G	0.2377	-0.0115	0.0018	1.6e-10
Arm fat percentage (left)	rs12422552	12:14413931	C	G	0.2683	-0.0094	0.0017	4.8e-08
Arm fat percentage (left)	rs12441543	15:31689543	A	G	0.2871	0.0105	0.0017	5.5e-10
Arm fat percentage (left)	rs12459368	19:18459377	G	A	0.2682	-0.0136	0.0017	2.3e-15
Arm fat percentage (left)	rs12471400	2:202917009	C	T	0.5174	0.0093	0.0015	1.2e-09
Arm fat percentage (left)	rs12628603	22:38119213	A	G	0.617	-0.0098	0.0016	3.9e-10
Arm fat percentage (left)	rs12635343	3:82713229	A	G	0.3614	0.01	0.0016	2.5e-10
Arm fat percentage (left)	rs12788343	11:131452912	C	T	0.4092	0.0115	0.0015	1.3e-13
Arm fat percentage (left)	rs12881869	14:50923249	T	C	0.0705	0.0174	0.003	5.5e-09
Arm fat percentage (left)	rs12883788	14:33303540	T	C	0.4598	0.0131	0.0015	1.6e-17
Arm fat percentage (left)	rs12885458	14:47303114	G	T	0.508	-0.0102	0.0015	2.2e-11
Arm fat percentage (left)	rs12890931	14:69753369	G	T	0.3624	0.0099	0.0016	5e-10
Arm fat percentage (left)	rs12992672	2:632592	A	G	0.8281	0.0315	0.002	2.7e-55
Arm fat percentage (left)	rs13030	17:61908556	T	C	0.3278	0.009	0.0016	3.1e-08
Arm fat percentage (left)	rs13084418	3:25316314	A	G	0.1298	-0.0139	0.0023	7.5e-10
Arm fat percentage (left)	rs13107325	4:103188709	T	C	0.0749	0.0369	0.0029	2.4e-37
Arm fat percentage (left)	rs13174863	5:139080745	G	A	0.1481	0.0152	0.0022	2e-12
Arm fat percentage (left)	rs1320251	17:21264396	T	C	0.4547	-0.0104	0.0015	1.1e-11
Arm fat percentage (left)	rs1322842	6:20488897	G	A	0.6095	-0.0112	0.0016	1e-12
Arm fat percentage (left)	rs13292699	9:15910044	C	A	0.4337	-0.0188	0.0015	1.7e-34
Arm fat percentage (left)	rs1336899	1:150678910	C	T	0.3935	-0.0087	0.0016	2e-08
Arm fat percentage (left)	rs13375176	1:222099865	C	T	0.202	-0.013	0.0019	7.2e-12
Arm fat percentage (left)	rs13389219	2:165528876	T	C	0.3924	0.0153	0.0016	5.6e-23
Arm fat percentage (left)	rs13427822	2:213414265	G	A	0.2712	-0.0098	0.0017	1.6e-08
Arm fat percentage (left)	rs1357079	3:153691949	C	T	0.5701	0.0111	0.0015	4.5e-13
Arm fat percentage (left)	rs1377184	1:215246432	T	A	0.7489	0.0111	0.0018	2.4e-10
Arm fat percentage (left)	rs1383723	4:67803507	T	A	0.7832	-0.0106	0.0018	8.9e-09
Arm fat percentage (left)	rs14057	1:6683240	A	G	0.3566	-0.0092	0.0016	6.9e-09
Arm fat percentage (left)	rs1421334	8:30865733	C	A	0.5489	-0.0106	0.0015	6e-12
Arm fat percentage (left)	rs1436348	3:104612668	G	A	0.5827	0.0101	0.0015	5.6e-11
Arm fat percentage (left)	rs1441264	13:79580919	A	G	0.5937	0.0133	0.0016	6.1e-17
Arm fat percentage (left)	rs144376234	1:110114504	T	C	0.0256	0.0554	0.0048	1.1e-30
Arm fat percentage (left)	rs1451963	14:41350367	T	G	0.0823	0.0171	0.0028	7.2e-10
Arm fat percentage (left)	rs1453055	2:181329491	A	G	0.2733	0.0121	0.0017	1.9e-12
Arm fat percentage (left)	rs1454687	3:94038085	G	C	0.5153	-0.0145	0.0015	1.5e-21
Arm fat percentage (left)	rs147819910	12:39996098	T	G	0.0182	0.0328	0.0057	7.9e-09
Arm fat percentage (left)	rs147860177	1:39554034	G	T	0.2322	0.0121	0.0018	2.3e-11
Arm fat percentage (left)	rs1503526	5:63020706	C	T	0.48	0.0118	0.0015	1.1e-14
Arm fat percentage (left)	rs1559900	8:14207321	T	C	0.2861	0.0106	0.0017	3.1e-10
Arm fat percentage (left)	rs156914	1:16848652	A	G	0.4918	0.0087	0.0015	1.1e-08
Arm fat percentage (left)	rs159037	5:94197477	C	T	0.2539	0.0098	0.0017	2.3e-08
Arm fat percentage (left)	rs1689265	1:29459117	G	A	0.9092	0.0155	0.0026	4.7e-09
Arm fat percentage (left)	rs16895838	4:17832418	C	T	0.1275	0.0134	0.0023	4.1e-09
Arm fat percentage (left)	rs16916303	9:30823761	G	A	0.1198	-0.0133	0.0024	1.9e-08
Arm fat percentage (left)	rs17055847	5:157983114	C	T	0.2954	0.0131	0.0017	5.2e-15
Arm fat percentage (left)	rs17193211	21:38885506	T	C	0.0668	-0.0176	0.0031	1.6e-08
Arm fat percentage (left)	rs1724557	4:137094048	A	C	0.5868	-0.0119	0.0016	1.7e-14
Arm fat percentage (left)	rs17446299	13:40762556	G	C	0.1655	0.012	0.0021	5e-09
Arm fat percentage (left)	rs17698176	17:44819595	G	T	0.2266	0.0102	0.0018	3e-08
Arm fat percentage (left)	rs17770336	9:28414625	T	C	0.3224	0.0168	0.0016	6.3e-25
Arm fat percentage (left)	rs17781552	1:203519648	A	G	0.5453	0.0086	0.0015	2.9e-08
Arm fat percentage (left)	rs17820010	5:50384662	G	T	0.2956	0.0106	0.0017	2.2e-10
Arm fat percentage (left)	rs1782508	11:30243795	G	C	0.6555	-0.0089	0.0016	2.7e-08
Arm fat percentage (left)	rs1801282	3:12393125	G	C	0.1195	0.0229	0.0023	1.1e-22
Arm fat percentage (left)	rs1808629	8:73435964	A	G	0.6854	-0.0148	0.0016	3e-19
Arm fat percentage (left)	rs1840126	2:236896765	C	A	0.5636	-0.0085	0.0015	3.3e-08
Arm fat percentage (left)	rs1852006	7:77829768	A	G	0.357	-0.0106	0.0016	2e-11
Arm fat percentage (left)	rs1861410	2:58933591	T	C	0.5554	-0.0138	0.0015	2e-19
Arm fat percentage (left)	rs1912638	15:47973744	C	G	0.3415	-0.0098	0.0016	1.6e-09
Arm fat percentage (left)	rs1945160	18:22164216	A	G	0.3759	-0.0087	0.0016	3.5e-08
Arm fat percentage (left)	rs1964675	3:136114945	T	C	0.7111	0.0105	0.0017	3.3e-10
Arm fat percentage (left)	rs1991002	5:52848593	G	T	0.4952	-0.0093	0.0015	1.1e-09
Arm fat percentage (left)	rs2034946	17:73863589	G	T	0.2088	0.0122	0.0019	8.4e-11
Arm fat percentage (left)	rs2035936	3:141298124	T	G	0.0559	0.0261	0.0034	7.6e-15
Arm fat percentage (left)	rs2052607	18:40788387	A	G	0.3439	-0.0139	0.0016	4.8e-18
Arm fat percentage (left)	rs2058527	16:6704749	G	T	0.7306	0.0105	0.0017	1.1e-09
Arm fat percentage (left)	rs215498	9:14440739	T	G	0.3241	0.0096	0.0016	5.3e-09
Arm fat percentage (left)	rs215638	7:32373541	T	G	0.6275	-0.011	0.0016	3.7e-12
Arm fat percentage (left)	rs2172131	10:133978962	C	T	0.5786	-0.0112	0.0015	4.4e-13
Arm fat percentage (left)	rs2182634	9:3962738	G	C	0.164	0.0116	0.0021	2.3e-08
Arm fat percentage (left)	rs2192527	4:18329824	G	A	0.4655	0.0135	0.0015	7.4e-19
Arm fat percentage (left)	rs2237025	4:55541879	C	T	0.5554	-0.0088	0.0015	1.3e-08
Arm fat percentage (left)	rs2242189	4:38691024	C	T	0.3811	-0.0098	0.0016	5.3e-10
Arm fat percentage (left)	rs2281819	6:33771673	A	T	0.2299	-0.0124	0.0018	8.2e-12
Arm fat percentage (left)	rs2289687	18:2847730	G	C	0.4429	-0.0094	0.0016	6.3e-09
Arm fat percentage (left)	rs2307111	5:75003678	C	T	0.3951	-0.0172	0.0016	1.9e-28
Arm fat percentage (left)	rs2356505	2:159534863	G	A	0.6503	0.0092	0.0016	9.5e-09
Arm fat percentage (left)	rs2370982	14:79890677	T	C	0.2142	0.0193	0.0019	4.7e-25
Arm fat percentage (left)	rs2455818	3:15741009	A	G	0.5977	-0.0092	0.0015	3.1e-09
Arm fat percentage (left)	rs2466103	8:32412304	G	T	0.3036	0.0104	0.0017	2.9e-10
Arm fat percentage (left)	rs2499468	6:51809081	A	C	0.651	0.0114	0.0016	9.8e-13
Arm fat percentage (left)	rs252748	5:77390494	T	C	0.5909	-0.0088	0.0016	1.8e-08
Arm fat percentage (left)	rs2569881	6:1620037	A	G	0.1287	-0.0137	0.0023	2e-09
Arm fat percentage (left)	rs2610245	5:63978255	G	A	0.5179	-0.0091	0.0015	3.9e-09
Arm fat percentage (left)	rs262956	3:183486117	G	T	0.6469	-0.0103	0.0016	1.2e-10
Arm fat percentage (left)	rs2678204	1:201800511	G	T	0.3402	0.0142	0.0016	6.2e-19
Arm fat percentage (left)	rs2692741	2:76185292	C	G	0.3672	0.0088	0.0016	2.6e-08
Arm fat percentage (left)	rs2731238	12:90559598	T	G	0.0675	-0.0206	0.0033	5.6e-10
Arm fat percentage (left)	rs2737263	8:116667539	T	G	0.2806	-0.0174	0.0017	1.1e-24
Arm fat percentage (left)	rs2765041	14:103991478	A	T	0.7105	-0.0114	0.0017	1e-11
Arm fat percentage (left)	rs2798297	4:3064004	A	G	0.3667	0.0094	0.0016	3.1e-09
Arm fat percentage (left)	rs2820446	1:219748818	G	C	0.2973	0.0183	0.0017	3.7e-28
Arm fat percentage (left)	rs28734088	15:58957827	T	C	0.1258	0.015	0.0023	8.2e-11
Arm fat percentage (left)	rs2943653	2:227047771	T	C	0.6728	-0.0152	0.0016	6.2e-21
Arm fat percentage (left)	rs2954021	8:126482077	G	A	0.5046	0.0117	0.0015	1.5e-14
Arm fat percentage (left)	rs2962334	5:86879056	T	G	0.0201	0.0326	0.0054	1.8e-09
Arm fat percentage (left)	rs2980237	8:76315205	T	G	0.7512	0.0111	0.0018	3.8e-10
Arm fat percentage (left)	rs3087523	2:105977776	A	G	0.1246	0.0136	0.0023	4.5e-09
Arm fat percentage (left)	rs3113509	4:52932825	T	C	0.732	-0.0099	0.0017	7.4e-09
Arm fat percentage (left)	rs3114914	16:89368030	T	C	0.7432	-0.0098	0.0018	2.6e-08
Arm fat percentage (left)	rs319788	17:31531617	T	C	0.6963	0.0093	0.0017	1.6e-08
Arm fat percentage (left)	rs34045894	10:33967489	A	G	0.1561	0.0124	0.0021	3.8e-09
Arm fat percentage (left)	rs34234296	2:175166636	A	G	0.3925	-0.0103	0.0016	6.8e-11
Arm fat percentage (left)	rs34292685	11:64049021	T	C	0.1618	-0.0144	0.0021	3.1e-12
Arm fat percentage (left)	rs34331990	19:30321561	G	T	0.4188	0.0106	0.0016	1e-11
Arm fat percentage (left)	rs34338229	6:15370313	A	G	0.332	0.0097	0.0016	2.3e-09
Arm fat percentage (left)	rs34483452	5:87986314	A	C	0.1363	0.025	0.0022	5.9e-29
Arm fat percentage (left)	rs34580448	5:82810884	C	T	0.0413	-0.0235	0.0038	8.9e-10
Arm fat percentage (left)	rs34606703	2:47014522	A	G	0.358	-0.0134	0.0016	3.1e-17
Arm fat percentage (left)	rs34796300	11:13315205	C	T	0.5706	0.0121	0.0015	3e-15
Arm fat percentage (left)	rs34882821	9:14783314	T	G	0.3385	0.0093	0.0016	6.8e-09
Arm fat percentage (left)	rs34898535	16:31025641	T	C	0.3779	-0.0157	0.0016	1.5e-23
Arm fat percentage (left)	rs34994596	15:80991447	C	T	0.2974	-0.0107	0.0017	1.2e-10
Arm fat percentage (left)	rs35023999	11:113266411	C	A	0.5083	-0.0096	0.0015	2.4e-10
Arm fat percentage (left)	rs35949039	16:70572605	T	G	0.1056	-0.0154	0.0025	7.1e-10
Arm fat percentage (left)	rs36090025	10:114774433	C	A	0.2997	-0.0096	0.0017	6.9e-09
Arm fat percentage (left)	rs3751859	16:81735012	A	G	0.1565	-0.0133	0.0021	2.2e-10
Arm fat percentage (left)	rs3764002	12:108618630	T	C	0.2615	-0.0146	0.0017	3.4e-17
Arm fat percentage (left)	rs3766823	1:32197257	A	G	0.172	0.013	0.002	1e-10
Arm fat percentage (left)	rs3770821	2:36762126	C	T	0.3327	0.0113	0.0016	2.7e-12
Arm fat percentage (left)	rs3774063	3:9511736	T	C	0.1021	0.0157	0.0025	4.1e-10
Arm fat percentage (left)	rs3803286	14:103246470	G	A	0.6668	-0.0112	0.0016	3.4e-12
Arm fat percentage (left)	rs3826408	17:7101292	T	C	0.4569	0.0096	0.0015	3.9e-10
Arm fat percentage (left)	rs3901286	7:99107727	A	C	0.1524	-0.0156	0.0021	1.9e-13
Arm fat percentage (left)	rs3911063	3:85906928	C	T	0.322	-0.011	0.0016	1.4e-11
Arm fat percentage (left)	rs394608	21:46581798	C	T	0.5377	0.0129	0.0015	4.3e-17
Arm fat percentage (left)	rs40071	5:107496102	C	T	0.1795	-0.0148	0.002	8.9e-14
Arm fat percentage (left)	rs4055791	13:59266053	T	C	0.4168	-0.011	0.0015	9.4e-13
Arm fat percentage (left)	rs4234589	3:185818882	G	A	0.1372	-0.0182	0.0022	1.5e-16
Arm fat percentage (left)	rs42523	7:94040999	C	T	0.2452	0.0097	0.0018	4.5e-08
Arm fat percentage (left)	rs429343	2:147903382	G	A	0.5766	-0.0118	0.0015	1.6e-14
Arm fat percentage (left)	rs429358	19:45411941	C	T	0.154	-0.0188	0.0021	4.5e-19
Arm fat percentage (left)	rs4307239	7:24354300	G	A	0.4588	0.0087	0.0015	1.1e-08
Arm fat percentage (left)	rs4311684	8:112395164	C	T	0.7067	0.0108	0.0017	1.2e-10
Arm fat percentage (left)	rs4398538	4:130724740	C	T	0.6425	-0.0111	0.0016	3.1e-12
Arm fat percentage (left)	rs4430672	14:63094407	C	T	0.8009	-0.0106	0.0019	2.9e-08
Arm fat percentage (left)	rs445077	2:105404701	A	T	0.4801	0.0123	0.0015	8.7e-16
Arm fat percentage (left)	rs4466418	8:126323787	A	G	0.5623	0.0087	0.0015	1.2e-08
Arm fat percentage (left)	rs4482463	2:205375909	A	C	0.9231	-0.0223	0.0029	6.4e-15
Arm fat percentage (left)	rs4549685	7:39326478	T	C	0.3298	-0.0128	0.0016	3.2e-15
Arm fat percentage (left)	rs4562625	1:209218583	G	C	0.6149	-0.0101	0.0016	1.1e-10
Arm fat percentage (left)	rs4605363	2:229010960	C	A	0.3416	0.0119	0.0016	1e-13
Arm fat percentage (left)	rs4673617	2:212290579	T	C	0.2718	0.0109	0.0017	2e-10
Arm fat percentage (left)	rs4722398	7:3125220	T	C	0.1361	0.0145	0.0022	6.4e-11
Arm fat percentage (left)	rs4737188	8:64756657	T	A	0.4738	-0.0085	0.0015	2.5e-08
Arm fat percentage (left)	rs4762951	12:20543307	G	A	0.7804	-0.0111	0.0018	1.5e-09
Arm fat percentage (left)	rs4771121	13:28018370	A	G	0.2751	-0.0108	0.0017	3.6e-10
Arm fat percentage (left)	rs4776985	15:68123021	G	T	0.225	-0.0215	0.0018	3.3e-32
Arm fat percentage (left)	rs4793085	17:42320732	C	A	0.6563	-0.0127	0.0016	3.3e-15
Arm fat percentage (left)	rs4820323	22:38599767	G	C	0.581	-0.0138	0.0015	5.7e-19
Arm fat percentage (left)	rs4837119	9:129672095	A	T	0.5173	-0.0124	0.0015	4.1e-16
Arm fat percentage (left)	rs4850788	2:198182940	A	G	0.3846	0.0088	0.0016	1.8e-08
Arm fat percentage (left)	rs4887872	16:76735249	C	T	0.1946	0.011	0.0019	1e-08
Arm fat percentage (left)	rs4930387	11:66449905	G	A	0.5311	0.0095	0.0015	4.4e-10
Arm fat percentage (left)	rs4933220	10:93556497	A	G	0.4251	-0.0087	0.0015	1.9e-08
Arm fat percentage (left)	rs4947124	6:111895728	A	G	0.7096	0.0102	0.0017	1.1e-09
Arm fat percentage (left)	rs522110	10:99772885	G	A	0.555	0.0141	0.0015	2.8e-20
Arm fat percentage (left)	rs543874	1:177889480	G	A	0.2053	0.033	0.0019	8.5e-69
Arm fat percentage (left)	rs55707359	11:46159333	G	T	0.0154	0.0367	0.0063	4.2e-09
[truncated: 146 more rows]

## Sheet: Table S3
Table S3: Genetic variants associated with stroke behaviors and their gene datasets.
Exposure	SNP	Gene	Variant type	Alleles	Chromosome	Canonical SPDI
smoking initiation	rs10001365	TTC29	SNV	G>A,T	4:146876062 (GRCh38), 4:147797214 (GRCh37)	NC_000004.12:146876061:G:A,NC_000004.12:146876061:G:T
smoking initiation	rs10934272	ZBTB20	SNV	C>T	3:114432664 (GRCh38), 3:114151511 (GRCh37)	NC_000003.12:114432663:C:T
smoking initiation	rs10968592	LINGO2	SNV	T>A,C	9:28429228 (GRCh38), 9:28429226 (GRCh37)	NC_000009.12:28429227:T:A,NC_000009.12:28429227:T:C
smoking initiation	rs10997380	CTNNA3	SNV	C>A,G,T	10:66782608 (GRCh38), 10:68542366 (GRCh37)	NC_000010.11:66782607:C:A,NC_000010.11:66782607:C:G,NC_000010.11:66782607:C:T
smoking initiation	rs11057005	LMO3	SNV	A>G	12:16595787 (GRCh38), 12:16748721 (GRCh37)	NC_000012.12:16595786:A:G
smoking initiation	rs11076967	RBFOX1	SNV	G>A,T	16:5784005 (GRCh38), 16:5834006 (GRCh37)	NC_000016.10:5784004:G:A,NC_000016.10:5784004:G:T
smoking initiation	rs11078713	CHD3	SNV	A>G,T	17:7892654 (GRCh38), 17:7795972 (GRCh37)	NC_000017.11:7892653:A:G,NC_000017.11:7892653:A:T
smoking initiation	rs1160685	GRID2	SNV	C>A,G	4:93131703 (GRCh38), 4:94052854 (GRCh37)	NC_000004.12:93131702:C:A,NC_000004.12:93131702:C:G
smoking initiation	rs11611651	GOLGA3	SNV	G>A	12:132804204 (GRCh38), 12:133380790 (GRCh37)	NC_000012.12:132804203:G:A
smoking initiation	rs116531886	VAV3	SNV	A>G	1:107910204 (GRCh38), 1:108452826 (GRCh37)	NC_000001.11:107910203:A:G
smoking initiation	rs11658881	VAV3	SNV	A>G	1:107910204 (GRCh38), 1:108452826 (GRCh37)	NC_000001.11:107910203:A:G
smoking initiation	rs11692232	SCYGR2	SNV	C>A	2:227599449 (GRCh38), 2:228464165 (GRCh37)	NC_000002.12:227599448:C:A
smoking initiation	rs11692435	ACTR1B	SNV	G>A	2:97658891 (GRCh38), 2:98275354 (GRCh37)	NC_000002.12:97658890:G:A
smoking initiation	rs2551456	LOC642484	SNV	C>A	18:56034929 (GRCh38), 18:53702160 (GRCh37)	NC_000018.10:56034928:C:A
smoking initiation	rs2595255	SCHIP1, IQCJ-SCHIP1	SNV	G>A,T	3:159317831 (GRCh38), 3:159035620 (GRCh37)	NC_000003.12:159317830:G:A,NC_000003.12:159317830:G:T
smoking initiation	rs2631024	C8orf88	SNV	A>C,G,T	8:90983349 (GRCh38), 8:91995577 (GRCh37)	NC_000008.11:90983348:A:C,NC_000008.11:90983348:A:G,NC_000008.11:90983348:A:T
smoking initiation	rs2710634	BIRC6	SNV	T>A,C	2:32583737 (GRCh38), 2:32808804 (GRCh37)	NC_000002.12:32583736:T:A,NC_000002.12:32583736:T:C
smoking initiation	rs2835985	KCNJ6	SNV	C>G,T	21:37817704 (GRCh38), 21:39190006 (GRCh37)	NC_000021.9:37817703:C:G,NC_000021.9:37817703:C:T
smoking initiation	rs2917666	NQO1-DT	SNV	C>G,T	16:69730057 (GRCh38), 16:69763960 (GRCh37)	NC_000016.10:69730056:C:G,NC_000016.10:69730056:C:T
smoking initiation	rs2958853	LRRC4C	SNV	G>A	11:41414215 (GRCh38), 11:41435765 (GRCh37)	NC_000011.10:41414214:G:A
smoking initiation	rs2959100	PHF21A	SNV	C>A,G,T	11:45993587 (GRCh38), 11:46015138 (GRCh37)	NC_000011.10:45993586:C:A,NC_000011.10:45993586:C:G,NC_000011.10:45993586:C:T
smoking initiation	rs72896886	SETBP1	SNV	G>A,C	18:45052687 (GRCh38), 18:42632652 (GRCh37)	NC_000018.10:45052686:G:A,NC_000018.10:45052686:G:C
smoking initiation	rs72976160	CTDP1	SNV	G>A	18:79737695 (GRCh38), 18:77497695 (GRCh37)	NC_000018.10:79737694:G:A
smoking initiation	rs7322872	CLYBL, CLYBL-AS3	SNV	C>A,G,T	13:99896075 (GRCh38), 13:100548329 (GRCh37)	NC_000013.11:99896074:C:A,NC_000013.11:99896074:C:G,NC_000013.11:99896074:C:T
smoking initiation	rs73654326	LOC101929563	SNV	A>T	9:23575362 (GRCh38), 9:23575360 (GRCh37)	NC_000009.12:23575361:A:T
smoking initiation	rs74876138	PLD1	SNV	T>A,C	3:171800589 (GRCh38), 3:171518379 (GRCh37)	NC_000003.12:171800588:T:A,NC_000003.12:171800588:T:C
smoking initiation	rs7505855	NOL4	SNV	C>A,G,T	18:34116111 (GRCh38), 18:31696075 (GRCh37)	NC_000018.10:34116110:C:A,NC_000018.10:34116110:C:G,NC_000018.10:34116110:C:T
smoking initiation	rs7555507	-	SNV	C>G,T	1:73300354 (GRCh38), 1:73766037 (GRCh37)	NC_000001.11:73300353:C:G,NC_000001.11:73300353:C:T
smoking initiation	rs7585579	-	SNV	C>G,T	2:59797722 (GRCh38), 2:60024857 (GRCh37)	NC_000002.12:59797721:C:G,NC_000002.12:59797721:C:T
smoking initiation	rs76214862	LINC02326, LOC107984685	SNV	A>C,G,T	14:29030924 (GRCh38), 14:29500130 (GRCh37)	NC_000014.9:29030923:A:C,NC_000014.9:29030923:A:G,NC_000014.9:29030923:A:T
smoking initiation	rs7631379	SOX2-OT	SNV	T>A,C	3:181691269 (GRCh38), 3:181409057 (GRCh37)	NC_000003.12:181691268:T:A,NC_000003.12:181691268:T:C
smoking initiation	rs76608582	HDGFL2	SNV	C>A,T	19:4474728 (GRCh38), 19:4474725 (GRCh37)	NC_000019.10:4474727:C:A,NC_000019.10:4474727:C:T
smoking initiation	rs77075313	HERC1	SNV	A>G	15:63609577 (GRCh38), 15:63901776 (GRCh37)	NC_000015.10:63609576:A:G
smoking initiation	rs10119117	-	SNV	C>T	9:29740030 (GRCh38), 9:29740028 (GRCh37)	NC_000009.12:29740029:C:T
smoking initiation	rs10130576	-	SNV	G>A	14:27822711 (GRCh38), 14:28291917 (GRCh37)	NC_000014.9:27822710:G:A
smoking initiation	rs10179773	LOC124906005	SNV	G>A,T	2:49622130 (GRCh38), 2:49849268 (GRCh37)	NC_000002.12:49622129:G:A,NC_000002.12:49622129:G:T
smoking initiation	rs10260968	MAD1L1	SNV	G>A,T	7:1850137 (GRCh38), 7:1889773 (GRCh37)	NC_000007.14:1850136:G:A,NC_000007.14:1850136:G:T
smoking initiation	rs10279261	EXOC4	SNV	G>A	7:133905093 (GRCh38), 7:133589846 (GRCh37)	NC_000007.14:133905092:G:A
smoking initiation	rs10446671	-	SNV	C>T	4:35482310 (GRCh38), 4:35483932 (GRCh37)	NC_000004.12:35482309:C:T
smoking initiation	rs10498846	-	SNV	C>A,T	6:66695444 (GRCh38), 6:67405337 (GRCh37)	NC_000006.12:66695443:C:A,NC_000006.12:66695443:C:T
smoking initiation	rs10507911	-	SNV	G>T	13:80615166 (GRCh38), 13:81189301 (GRCh37)	NC_000013.11:80615165:G:T
smoking initiation	rs1050847	ZCCHC14	SNV	C>A,T	16:87410128 (GRCh38), 16:87443734 (GRCh37)	NC_000016.10:87410127:C:A,NC_000016.10:87410127:C:T
smoking initiation	rs10698713	TULP4	SNV	G>A	6:158461288 (GRCh38), 6:158882320 (GRCh37)	NC_000006.12:158461287:G:A
smoking initiation	rs10819050	MAPKAP1	SNV	G>A,T	9:125474899 (GRCh38), 9:128237178 (GRCh37)	NC_000009.12:125474898:G:A,NC_000009.12:125474898:G:T
smoking initiation	rs10873871	ST6GALNAC3	SNV	A>G	1:76223334 (GRCh38), 1:76689019 (GRCh37)	NC_000001.11:76223333:A:G
smoking initiation	rs10905461	-	SNV	T>C	10:8761588 (GRCh38), 10:8803551 (GRCh37)	NC_000010.11:8761587:T:C
smoking initiation	rs11256434	-	SNV	T>C,G	10:10002942 (GRCh38), 10:10044905 (GRCh37)	NC_000010.11:10002941:T:C,NC_000010.11:10002941:T:G
smoking initiation	rs1126757	IL11	SNV	C>G,T	19:55368504 (GRCh38), 19:55879872 (GRCh37)	NC_000019.10:55368503:C:G,NC_000019.10:55368503:C:T
smoking initiation	rs113746525	-	SNV	G>A,T	2:60750160 (GRCh38), 2:60977295 (GRCh37)	NC_000002.12:60750159:G:A,NC_000002.12:60750159:G:T
smoking initiation	rs1154693	-	SNV	A>G,T	3:118085307 (GRCh38), 3:117804154 (GRCh37)	NC_000003.12:118085306:A:G,NC_000003.12:118085306:A:T
smoking initiation	rs11712680	-	SNV	A>C,T	3:74959868 (GRCh38), 3:75009019 (GRCh37)	NC_000003.12:74959867:A:C,NC_000003.12:74959867:A:T
smoking initiation	rs117143374	PSMG1	SNV	T>A,C,G	21:39183635 (GRCh38), 21:40555561 (GRCh37)	NC_000021.9:39183634:T:A,NC_000021.9:39183634:T:C,NC_000021.9:39183634:T:G
smoking initiation	rs11716705	-	SNV	A>G	3:34687261 (GRCh38), 3:34728753 (GRCh37)	NC_000003.12:34687260:A:G
smoking initiation	rs11756490	-	SNV	T>A,C	6:99893898 (GRCh38), 6:100341774 (GRCh37)	NC_000006.12:99893897:T:A,NC_000006.12:99893897:T:C
smoking initiation	rs11872397	ZNF407	SNV	G>A	18:74823326 (GRCh38), 18:72535282 (GRCh37)	NC_000018.10:74823325:G:A
smoking initiation	rs11926232	ERC2	SNV	A>G,T	3:55902389 (GRCh38), 3:55936417 (GRCh37)	NC_000003.12:55902388:A:G,NC_000003.12:55902388:A:T
smoking initiation	rs11941714	LINC02497	SNV	G>A	4:31201047 (GRCh38), 4:31202669 (GRCh37)	NC_000004.12:31201046:G:A
smoking initiation	rs12025237	UBAP2L	SNV	A>C,T	1:154232644 (GRCh38), 1:154205120 (GRCh37)	NC_000001.11:154232643:A:C,NC_000001.11:154232643:A:T
smoking initiation	rs12047884	RAP1A,LINC01160	SNV	T>G	1:111599791 (GRCh38), 1:112142413 (GRCh37)	NC_000001.11:111599790:T:G
smoking initiation	rs12186738	-	SNV	G>T	5:104480954 (GRCh38), 5:103816655 (GRCh37)	NC_000005.10:104480953:G:T
smoking initiation	rs12356821	WBP1L	SNV	G>C	10:102804051 (GRCh38), 10:104563808 (GRCh37)	NC_000010.11:102804050:G:C
smoking initiation	rs12441907	-	SNV	C>A	15:83253635 (GRCh38), 15:83922387 (GRCh37)	NC_000015.10:83253634:C:A
smoking initiation	rs12474587	SLC4A10	SNV	G>C,T	2:161946483 (GRCh38), 2:162802993 (GRCh37)	NC_000002.12:161946482:G:C,NC_000002.12:161946482:G:T
smoking initiation	rs12479064	REV1	SNV	C>T	2:99429576 (GRCh38), 2:100046038 (GRCh37)	NC_000002.12:99429575:C:T
smoking initiation	rs12545053	LINC01414	SNV	A>G	8:64161048 (GRCh38), 8:65073605 (GRCh37)	NC_000008.11:64161047:A:G
smoking initiation	rs12671250	LINC01414	SNV	A>G	8:64161048 (GRCh38), 8:65073605 (GRCh37)	NC_000008.11:64161047:A:G
smoking initiation	rs12714017	-	SNV	T>A,C	2:80772273 (GRCh38), 2:80999398 (GRCh37)	NC_000002.12:80772272:T:A,NC_000002.12:80772272:T:C
smoking initiation	rs13007361	-	SNV	G>A,T	2:165393734 (GRCh38), 2:166250244 (GRCh37)	NC_000002.12:165393733:G:A,NC_000002.12:165393733:G:T
smoking initiation	rs13013954	-	SNV	A>C,T	2:183575015 (GRCh38), 2:184439743 (GRCh37)	NC_000002.12:183575014:A:C,NC_000002.12:183575014:A:T
smoking initiation	rs13030994	-	SNV	G>A,C,T	2:145385522 (GRCh38), 2:146143090 (GRCh37)	NC_000002.12:145385521:G:A,NC_000002.12:145385521:G:C,NC_000002.12:145385521:G:T
smoking initiation	rs13246563	SDK1, LOC124901577	SNV	C>A,G,T	7:3398611 (GRCh38), 7:3438243 (GRCh37)	NC_000007.14:3398610:C:A,NC_000007.14:3398610:C:G,NC_000007.14:3398610:C:T
smoking initiation	rs13250170	RUNX1T1	SNV	A>C,G	8:92023103 (GRCh38), 8:93035331 (GRCh37)	NC_000008.11:92023102:A:C,NC_000008.11:92023102:A:G
smoking initiation	rs13261666	TOX	SNV	G>A,T	8:58902107 (GRCh38), 8:59814666 (GRCh37)	NC_000008.11:58902106:G:A,NC_000008.11:58902106:G:T
smoking initiation	rs13391128	ERBB4	SNV	A>G	2:212252479 (GRCh38), 2:213117204 (GRCh37)	NC_000002.12:212252478:A:G
smoking initiation	rs134529	TTC28	SNV	T>C	22:28385770 (GRCh38), 22:28781758 (GRCh37)	NC_000022.11:28385769:T:C
smoking initiation	rs1385108	-	SNV	C>T	5:155460086 (GRCh38), 5:154839646 (GRCh37)	NC_000005.10:155460085:C:T
smoking initiation	rs1392510	-	SNV	T>C,G	9:8296740 (GRCh38), 9:8296740 (GRCh37)	NC_000009.12:8296739:T:C,NC_000009.12:8296739:T:G
smoking initiation	rs1393450	NLGN1	SNV	T>G	3:173684380 (GRCh38), 3:173402170 (GRCh37)	NC_000003.12:173684379:T:G
smoking initiation	rs1406797	PTPRG	SNV	G>A,C	3:61921648 (GRCh38), 3:61907322 (GRCh37)	NC_000003.12:61921647:G:A,NC_000003.12:61921647:G:C
smoking initiation	rs1414909	-	SNV	G>A	10:81055918 (GRCh38), 10:82815674 (GRCh37)	NC_000010.11:81055917:G:A
smoking initiation	rs1445649	KCNJ3	SNV	T>A,C,G	2:154826044 (GRCh38), 2:155682556 (GRCh37)	NC_000002.12:154826043:T:A,NC_000002.12:154826043:T:C,NC_000002.12:154826043:T:G
smoking initiation	rs145151226	LINC01205	SNV	C>A	3:109476437 (GRCh38), 3:109195284 (GRCh37)	NC_000003.12:109476436:C:A
smoking initiation	rs147662818	ZRANB1	SNV	C>T	10:124946193 (GRCh38), 10:126634762 (GRCh37)	NC_000010.11:124946192:C:T
smoking initiation	rs1485272	-	SNV	T>C,G	3:3685905 (GRCh38), 3:3727589 (GRCh37)	NC_000003.12:3685904:T:C,NC_000003.12:3685904:T:G
smoking initiation	rs1533772	RYR2	SNV	A>G,T	1:237681648 (GRCh38), 1:237844948 (GRCh37)	NC_000001.11:237681647:A:G,NC_000001.11:237681647:A:T
smoking initiation	rs1555445	NOL4L-DT	SNV	A>T	20:32587456 (GRCh38), 20:31175258 (GRCh37)	NC_000020.11:32587455:A:T
smoking initiation	rs1569916	LOC105372677	SNV	C>T	20:55817380 (GRCh38), 20:54392436 (GRCh37)	NC_000020.11:55817379:C:T
smoking initiation	rs1621770	-	SNV	A>T	5:51645050 (GRCh38), 5:50940884 (GRCh37)	NC_000005.10:51645049:A:T
smoking initiation	rs16896316	EYS	SNV	A>G	6:65122921 (GRCh38), 6:65832814 (GRCh37)	NC_000006.12:65122920:A:G
smoking initiation	rs16975171	-	SNV	C>A	18:41689686 (GRCh38), 18:39269650 (GRCh37)	NC_000018.10:41689685:C:A
smoking initiation	rs17016894	TOP2B	SNV	C>T	3:25631287 (GRCh38), 3:25672778 (GRCh37)	NC_000003.12:25631286:C:T
smoking initiation	rs1714521	MLF1-DT	SNV	A>C,T	3:158567072 (GRCh38), 3:158284861 (GRCh37)	NC_000003.12:158567071:A:C,NC_000003.12:158567071:A:T
smoking initiation	rs17165769	FBXL17	SNV	A>G	5:108029941 (GRCh38), 5:107365642 (GRCh37)	NC_000005.10:108029940:A:G
smoking initiation	rs17692129	NSF, LRRC37A2	SNV	C>T	17:46715917 (GRCh38), 17:44793283 (GRCh37)	NC_000017.11:46715916:C:T
smoking initiation	rs1776631	LOC105376481, LOC105376482, LOC105376483	SNV	T>A,C,G	10:31133648 (GRCh38), 10:31422577 (GRCh37)	NC_000010.11:31133647:T:A,NC_000010.11:31133647:T:C,NC_000010.11:31133647:T:G
smoking initiation	rs1834306	MIR100HG, MIR100, MIR10526	SNV	A>G	11:122152479 (GRCh38), 11:122023187 (GRCh37)	NC_000011.10:122152478:A:G
smoking initiation	rs1869243	LOC105376939	SNV	T>A,C	3:5682849 (GRCh38), 3:5724536 (GRCh37)	NC_000003.12:5682848:T:A,NC_000003.12:5682848:T:C
smoking initiation	rs1899896	-	SNV	C>T	8:92188808 (GRCh38), 8:93201036 (GRCh37)	NC_000008.11:92188807:C:T
smoking initiation	rs1921087	-	SNV	A>C	5:30839500 (GRCh38), 5:30839607 (GRCh37)	NC_000005.10:30839499:A:C
smoking initiation	rs1971318	-	SNV	C>T	12:120951697 (GRCh38), 12:121389500 (GRCh37)	NC_000012.12:120951696:C:T
smoking initiation	rs2010921	NTM	SNV	G>A	11:132228311 (GRCh38), 11:132098205 (GRCh37)	NC_000011.10:132228310:G:A
smoking initiation	rs2046850	SYT14	SNV	C>T	1:210130974 (GRCh38), 1:210304319 (GRCh37)	NC_000001.11:210130973:C:T
smoking initiation	rs2050586	LOC105378834	SNV	G>C	1:87440145 (GRCh38), 1:87905828 (GRCh37)	NC_000001.11:87440144:G:C
smoking initiation	rs2072155	MAGI2	SNV	T>A,C	7:78133140 (GRCh38), 7:77762457 (GRCh37)	NC_000007.14:78133139:T:A,NC_000007.14:78133139:T:C
smoking initiation	rs2074118	DOCK4, LOC124901727	SNV	A>G	7:111755931 (GRCh38), 7:111395987 (GRCh37)	NC_000007.14:111755930:A:G
smoking initiation	rs2107300	LOC124906112	SNV	C>A,G,T	2:200073178 (GRCh38), 2:200937901 (GRCh37)	NC_000002.12:200073177:C:A,NC_000002.12:200073177:C:G,NC_000002.12:200073177:C:T
smoking initiation	rs2173019	TENM2	SNV	T>A	5:168187966 (GRCh38), 5:167614971 (GRCh37)	NC_000005.10:168187965:T:A
smoking initiation	rs2196356	-	SNV	G>C	3:70841137 (GRCh38), 3:70890288 (GRCh37)	NC_000003.12:70841136:G:C
smoking initiation	rs222449	CILK1	SNV	A>C,G,T	6:53051264 (GRCh38), 6:52916062 (GRCh37)	NC_000006.12:53051263:A:C,NC_000006.12:53051263:A:G,NC_000006.12:53051263:A:T
smoking initiation	rs2378662	LOC101927575	SNV	G>A	9:84092374 (GRCh38), 9:86707289 (GRCh37)	NC_000009.12:84092373:G:A
smoking initiation	rs2547030	-	SNV	G>A	16:24842597 (GRCh38), 16:24853918 (GRCh37)	NC_000016.10:24842596:G:A
smoking initiation	rs2960029	-	SNV	G>A,C,T	18:30216586 (GRCh38), 18:27796551 (GRCh37)	NC_000018.10:30216585:G:A,NC_000018.10:30216585:G:C,NC_000018.10:30216585:G:T
smoking initiation	rs3001723	PTPRF	SNV	G>A	1:43572014 (GRCh38), 1:44037685 (GRCh37)	NC_000001.11:43572013:G:A
smoking initiation	rs3213876	LOC105372201	SNV	T>C	18:75472023 (GRCh38), 18:73183978 (GRCh37)	NC_000018.10:75472022:T:C
smoking initiation	rs324768	-	SNV	A>G	12:83575321 (GRCh38), 12:83969100 (GRCh37)	NC_000012.12:83575320:A:G
smoking initiation	rs35702515	THSD7B	SNV	G>A,T	2:136785277 (GRCh38), 2:137542847 (GRCh37)	NC_000002.12:136785276:G:A,NC_000002.12:136785276:G:T
smoking initiation	rs35887108	-	SNV	C>T	3:144061790 (GRCh38), 3:143780632 (GRCh37)	NC_000003.12:144061789:C:T
smoking initiation	rs3801289	DLX6, DLX6-AS1	SNV	A>C	7:97008955 (GRCh38), 7:96638267 (GRCh37)	NC_000007.14:97008954:A:C
smoking initiation	rs3811038	TTL	SNV	T>C	2:112482606 (GRCh38), 2:113240183 (GRCh37)	NC_000002.12:112482605:T:C
smoking initiation	rs3904512	TRPC4	SNV	G>A	13:37783334 (GRCh38), 13:38357471 (GRCh37)	NC_000013.11:37783333:G:A
smoking initiation	rs3934797	-	SNV	G>A,C	4:111546456 (GRCh38), 4:112467612 (GRCh37)	NC_000004.12:111546455:G:A,NC_000004.12:111546455:G:C
smoking initiation	rs4044321	TENM2	SNV	A>C,G,T	5:167562508 (GRCh38), 5:166989513 (GRCh37)	NC_000005.10:167562507:A:C,NC_000005.10:167562507:A:G,NC_000005.10:167562507:A:T
smoking initiation	rs41264285	ADAM15, DCST1-AS1	SNV	C>T	1:155061442 (GRCh38), 1:155033918 (GRCh37)	NC_000001.11:155061441:C:T
smoking initiation	rs41274959	TEX10	SNV	G>A,T	9:100306684 (GRCh38), 9:103068966 (GRCh37)	NC_000009.12:100306683:G:A,NC_000009.12:100306683:G:T
smoking initiation	rs4236259	ELFN1	SNV	T>A,G	7:1668444 (GRCh38), 7:1708080 (GRCh37)	NC_000007.14:1668443:T:A,NC_000007.14:1668443:T:G
smoking initiation	rs4433590	FAM168A	SNV	G>A,C,T	11:73599623 (GRCh38), 11:73310668 (GRCh37)	NC_000011.10:73599622:G:A,NC_000011.10:73599622:G:C,NC_000011.10:73599622:G:T
smoking initiation	rs4518351	CDH12	SNV	A>G,T	5:22219394 (GRCh38), 5:22219503 (GRCh37)	NC_000005.10:22219393:A:G,NC_000005.10:22219393:A:T
smoking initiation	rs4523689	OR10A6	SNV	A>G,T	11:7929250 (GRCh38), 11:7950797 (GRCh37)	NC_000011.10:7929249:A:G,NC_000011.10:7929249:A:T
smoking initiation	rs4543592	-	SNV	T>A,C	9:3014254 (GRCh38), 9:3014254 (GRCh37)	NC_000009.12:3014253:T:A,NC_000009.12:3014253:T:C
smoking initiation	rs4674993	NYAP2	SNV	A>C,G	2:225467317 (GRCh38), 2:226332033 (GRCh37)	NC_000002.12:225467316:A:C,NC_000002.12:225467316:A:G
smoking initiation	rs4713121	-	SNV	T>C	6:27754285 (GRCh38), 6:27722064 (GRCh37)	NC_000006.12:27754284:T:C
smoking initiation	rs4714071	LINC02520	SNV	C>T	6:37506617 (GRCh38), 6:37474393 (GRCh37)	NC_000006.12:37506616:C:T
smoking initiation	rs4781977	LOC105371106	SNV	T>C	16:17478817 (GRCh38), 16:17572674 (GRCh37)	NC_000016.10:17478816:T:C
smoking initiation	rs4785187	ZNF423	SNV	G>A,C,T	16:49732861 (GRCh38), 16:49766772 (GRCh37)	NC_000016.10:49732860:G:A,NC_000016.10:49732860:G:C,NC_000016.10:49732860:G:T
smoking initiation	rs4785836	LINC00922	SNV	T>A,C,G	16:65570749 (GRCh38), 16:65604652 (GRCh37)	NC_000016.10:65570748:T:A,NC_000016.10:65570748:T:C,NC_000016.10:65570748:T:G
smoking initiation	rs480939	FAT3	SNV	G>A,T	11:92549247 (GRCh38), 11:92282413 (GRCh37)	NC_000011.10:92549246:G:A,NC_000011.10:92549246:G:T
smoking initiation	rs4822102	TCF20	SNV	C>G,T	22:42302424 (GRCh38), 22:42698430 (GRCh37)	NC_000022.11:42302423:C:G,NC_000022.11:42302423:C:T
smoking initiation	rs4837631	BRINP1	SNV	C>A,T	9:119299670 (GRCh38), 9:122061948 (GRCh37)	NC_000009.12:119299669:C:A,NC_000009.12:119299669:C:T
smoking initiation	rs501796	-	SNV	G>A,C	18:7466112 (GRCh38), 18:7466110 (GRCh37)	NC_000018.10:7466111:G:A,NC_000018.10:7466111:G:C
smoking initiation	rs55958435	NR2F2-AS1	SNV	A>G,T	15:96309409 (GRCh38), 15:96852638 (GRCh37)	NC_000015.10:96309408:A:G,NC_000015.10:96309408:A:T
smoking initiation	rs55968130	ZNF423	SNV	C>A	16:49584263 (GRCh38), 16:49618174 (GRCh37)	NC_000016.10:49584262:C:A
smoking initiation	rs56169608	IGSF21	SNV	G>A	1:18113497 (GRCh38), 1:18439991 (GRCh37)	NC_000001.11:18113496:G:A
smoking initiation	rs568599	-	SNV	G>A,C	11:121665302 (GRCh38), 11:121536011 (GRCh37)	NC_000011.10:121665301:G:A,NC_000011.10:121665301:G:C
smoking initiation	rs61533748	-	SNV	T>C	2:22360096 (GRCh38), 2:22582968 (GRCh37)	NC_000002.12:22360095:T:C
smoking initiation	rs61959481	-	SNV	G>A	13:55260794 (GRCh38), 13:55834929 (GRCh37)	NC_000013.11:55260793:G:A
smoking initiation	rs62074192	-	SNV	G>A,C	17:16341813 (GRCh38), 17:16245127 (GRCh37)	NC_000017.11:16341812:G:A,NC_000017.11:16341812:G:C
smoking initiation	rs62340589	GPM6A, LOC107984113	SNV	G>C	4:175954644 (GRCh38), 4:176875795 (GRCh37)	NC_000004.12:175954643:G:C
smoking initiation	rs628891	PTPRM	SNV	C>A,G,T	18:8381075 (GRCh38), 18:8381073 (GRCh37)	NC_000018.10:8381074:C:A,NC_000018.10:8381074:C:G,NC_000018.10:8381074:C:T
smoking initiation	rs6433897	LINC01934	SNV	T>C	2:181169721 (GRCh38), 2:182034448 (GRCh37)	NC_000002.12:181169720:T:C
smoking initiation	rs644400	LOC105377899	SNV	G>A,C,T	6:93464492 (GRCh38), 6:94174210 (GRCh37)	NC_000006.12:93464491:G:A,NC_000006.12:93464491:G:C,NC_000006.12:93464491:G:T
smoking initiation	rs6508144	DCC	SNV	C>G,T	18:52499772 (GRCh38), 18:50026142 (GRCh37)	NC_000018.10:52499771:C:G,NC_000018.10:52499771:C:T
smoking initiation	rs6800583	-	SNV	A>G	3:16810253 (GRCh38), 3:16851755 (GRCh37)	NC_000003.12:16810252:A:G
smoking initiation	rs6893752	NDUFAF2	SNV	A>G	5:61079085 (GRCh38), 5:60374912 (GRCh37)	NC_000005.10:61079084:A:G
smoking initiation	rs6914489	MMS22L	SNV	C>T	6:97248688 (GRCh38), 6:97696564 (GRCh37)	NC_000006.12:97248687:C:T
smoking initiation	rs694739	LOC102723878	SNV	A>G,T	11:64329761 (GRCh38), 11:64097233 (GRCh37)	NC_000011.10:64329760:A:G,NC_000011.10:64329760:A:T
smoking initiation	rs6956116	CADPS2	SNV	G>A,C	7:122606284 (GRCh38), 7:122246338 (GRCh37)	NC_000007.14:122606283:G:A,NC_000007.14:122606283:G:C
smoking initiation	rs6974377	-	SNV	T>A,C,G	7:21357787 (GRCh38), 7:21397405 (GRCh37)	NC_000007.14:21357786:T:A,NC_000007.14:21357786:T:C,NC_000007.14:21357786:T:G
smoking initiation	rs71600499	PRDM5	SNV	G>A,C,T	4:120714443 (GRCh38), 4:121635598 (GRCh37)	NC_000004.12:120714442:G:A,NC_000004.12:120714442:G:C,NC_000004.12:120714442:G:T
smoking initiation	rs7197072	RHOT2, WDR90	SNV	C>T	16:667085 (GRCh38), 16:717085 (GRCh37)	NC_000016.10:667084:C:T
smoking initiation	rs7224742	C17orf75	SNV	C>T	17:32330039 (GRCh38), 17:30657058 (GRCh37)	NC_000017.11:32330038:C:T
smoking initiation	rs72730742	LINGO1	SNV	A>C	15:77804871 (GRCh38), 15:78097213 (GRCh37)	NC_000015.10:77804870:A:C
smoking initiation	rs72789632	EFNA5	SNV	C>T	5:107498662 (GRCh38), 5:106834363 (GRCh37)	NC_000005.10:107498661:C:T
smoking initiation	rs72802545	-	SNV	A>C	10:70964345 (GRCh38), 10:72724102 (GRCh37)	NC_000010.11:70964344:A:C
smoking initiation	rs7717387	-	SNV	C>A,G,T	5:91959749 (GRCh38), 5:91255566 (GRCh37)	NC_000005.10:91959748:C:A,NC_000005.10:91959748:C:G,NC_000005.10:91959748:C:T
smoking initiation	rs77803288	FOXN3	SNV	C>T	14:89591508 (GRCh38), 14:90057852 (GRCh37)	NC_000014.9:89591507:C:T
smoking initiation	rs78648167	LOC107984361	SNV	A>G	11:87361959 (GRCh38), 11:87073001 (GRCh37)	NC_000011.10:87361958:A:G
smoking initiation	rs7921378	ARID5B	SNV	G>C	10:61915126 (GRCh38), 10:63674885 (GRCh37)	NC_000010.11:61915125:G:C
smoking initiation	rs79222572	-	SNV	T>A,G	6:164687522 (GRCh38), 6:165108555 (GRCh37)	NC_000006.12:164687521:T:A,NC_000006.12:164687521:T:G
smoking initiation	rs7929518	EED	SNV	A>G	11:86269916 (GRCh38), 11:85980958 (GRCh37)	NC_000011.10:86269915:A:G
smoking initiation	rs7999164	-	SNV	G>A	13:100602679 (GRCh38), 13:101254933 (GRCh37)	NC_000013.11:100602678:G:A
smoking initiation	rs8010469	-	SNV	A>G,T	14:58176650 (GRCh38), 14:58643368 (GRCh37)	NC_000014.9:58176649:A:G,NC_000014.9:58176649:A:T
smoking initiation	rs8027457	IGF1R	SNV	T>A,C	15:98660872 (GRCh38), 15:99204101 (GRCh37)	NC_000015.10:98660871:T:A,NC_000015.10:98660871:T:C
smoking initiation	rs9423279	CPXM2	SNV	C>G	10:123920903 (GRCh38), 10:125680419 (GRCh37)	NC_000010.11:123920902:C:G
smoking initiation	rs9471935	-	SNV	G>A	6:42872580 (GRCh38), 6:42840318 (GRCh37)	NC_000006.12:42872579:G:A
smoking initiation	rs9540729	PCDH9	SNV	A>T	13:66372992 (GRCh38), 13:66947124 (GRCh37)	NC_000013.11:66372991:A:T
smoking initiation	rs9603051	-	SNV	A>C,G	13:36519290 (GRCh38), 13:37093427 (GRCh37)	NC_000013.11:36519289:A:C,NC_000013.11:36519289:A:G
smoking initiation	rs962625	LOC105374557	SNV	A>G	4:28471902 (GRCh38), 4:28473524 (GRCh37)	NC_000004.12:28471901:A:G
smoking initiation	rs9627272	LINC00899, LOC124905135	SNV	G>C,T	22:46046408 (GRCh38), 22:46442288 (GRCh37)	NC_000022.11:46046407:G:C,NC_000022.11:46046407:G:T
smoking initiation	rs9880657	-	SNV	A>C,G,T	3:132194046 (GRCh38), 3:131912890 (GRCh37)	NC_000003.12:132194045:A:C,NC_000003.12:132194045:A:G,NC_000003.12:132194045:A:T
Past tobacco smoking	rs10956808	-	SNV	T>A,G	8:91763144 (GRCh38), 8:92775372 (GRCh37)	NC_000008.11:91763143:T:A,NC_000008.11:91763143:T:G
Past tobacco smoking	rs10959442	-	SNV	T>A,G	9:10993737 (GRCh38), 9:10993737 (GRCh37)	NC_000009.12:10993736:T:A,NC_000009.12:10993736:T:G
Past tobacco smoking	rs1109480	CABP1	SNV	G>A	12:120645476 (GRCh38), 12:121083279 (GRCh37)	NC_000012.12:120645475:G:A
Past tobacco smoking	rs1174864	-	SNV	G>A,T	7:53059866 (GRCh38), 7:53127559 (GRCh37)	NC_000007.14:53059865:G:A,NC_000007.14:53059865:G:T
Past tobacco smoking	rs12209519	-	SNV	A>G	6:66839247 (GRCh38), 6:67549140 (GRCh37)	NC_000006.12:66839246:A:G
Past tobacco smoking	rs12450028	SMG6, SRR	SNV	C>G,T	17:2304131 (GRCh38), 17:2207425 (GRCh37)	NC_000017.11:2304130:C:G,NC_000017.11:2304130:C:T
Past tobacco smoking	rs12487411	LINC01811	SNV	G>A,T	3:34380678 (GRCh38), 3:34422170 (GRCh37)	NC_000003.12:34380677:G:A,NC_000003.12:34380677:G:T
Past tobacco smoking	rs12608052	-	SNV	C>T	18:52276790 (GRCh38), 18:49803160 (GRCh37)	NC_000018.10:52276789:C:T
Past tobacco smoking	rs12895462	-	SNV	T>C	14:77149098 (GRCh38), 14:77615441 (GRCh37)	NC_000014.9:77149097:T:C
Past tobacco smoking	rs13009008	MAP3K20	SNV	A>G	2:173178505 (GRCh38), 2:174043233 (GRCh37)	NC_000002.12:173178504:A:G
Past tobacco smoking	rs139896	POLR2F	SNV	T>A,C,G	22:38001790 (GRCh38), 22:38397797 (GRCh37)	NC_000022.11:38001789:T:A,NC_000022.11:38001789:T:C,NC_000022.11:38001789:T:G
Past tobacco smoking	rs147052174	FAM163A, LOC105371634	SNV	G>A,C,T	1:179814032 (GRCh38), 1:179783167 (GRCh37)	NC_000001.11:179814031:G:A,NC_000001.11:179814031:G:C,NC_000001.11:179814031:G:T
Past tobacco smoking	rs1499300	PLXNA4	SNV	A>C,G	7:132626241 (GRCh38), 7:132311000 (GRCh37)	NC_000007.14:132626240:A:C,NC_000007.14:132626240:A:G
Past tobacco smoking	rs1499976	-	SNV	T>C,G	3:118082483 (GRCh38), 3:117801330 (GRCh37)	NC_000003.12:118082482:T:C,NC_000003.12:118082482:T:G
Past tobacco smoking	rs1559278	-	SNV	T>C	5:51498387 (GRCh38), 5:50794221 (GRCh37)	NC_000005.10:51498386:T:C
Past tobacco smoking	rs1611723	-	SNV	A>G,T	6:29862728 (GRCh38), 6:29830505 (GRCh37)	NC_000006.12:29862727:A:G,NC_000006.12:29862727:A:T
Past tobacco smoking	rs17503369	-	SNV	T>C	1:73381425 (GRCh38), 1:73847108 (GRCh37)	NC_000001.11:73381424:T:C
Past tobacco smoking	rs2367724	-	SNV	C>A,T	1:43641757 (GRCh38), 1:44107428 (GRCh37)	NC_000001.11:43641756:C:A,NC_000001.11:43641756:C:T
Past tobacco smoking	rs2433055	TMEM71	SNV	T>A,G	8:132757559 (GRCh38), 8:133769805 (GRCh37)	NC_000008.11:132757558:T:A,NC_000008.11:132757558:T:G
Past tobacco smoking	rs27003	MCTP1	SNV	T>A,C	5:94866462 (GRCh38), 5:94202167 (GRCh37)	NC_000005.10:94866461:T:A,NC_000005.10:94866461:T:C
Past tobacco smoking	rs2797793	LINC02520	SNV	T>A,C,G	6:37509486 (GRCh38), 6:37477262 (GRCh37)	NC_000006.12:37509485:T:A,NC_000006.12:37509485:T:C,NC_000006.12:37509485:T:G
Past tobacco smoking	rs2862465	-	SNV	G>A,T	11:42357942 (GRCh38), 11:42379492 (GRCh37)	NC_000011.10:42357941:G:A,NC_000011.10:42357941:G:T
Past tobacco smoking	rs28647734	OLFM1	SNV	G>A	9:135085187 (GRCh38), 9:137977033 (GRCh37)	NC_000009.12:135085186:G:A
Past tobacco smoking	rs290882	-	SNV	T>A,C	2:117505411 (GRCh38), 2:118262987 (GRCh37)	NC_000002.12:117505410:T:A,NC_000002.12:117505410:T:C
Past tobacco smoking	rs2952251	MSRA	SNV	A>C,G,T	8:10285654 (GRCh38), 8:10143164 (GRCh37)	NC_000008.11:10285653:A:C,NC_000008.11:10285653:A:G,NC_000008.11:10285653:A:T
Past tobacco smoking	rs35761479	TPM3		G>A	1:154181718 (GRCh38), 1:154154194 (GRCh37)	NC_000001.11:154181717:G:A
Past tobacco smoking	rs3808937	MFSD13A, LOC124902493		C>T	10:102470255 (GRCh38), 10:104230012 (GRCh37)	NC_000010.11:102470254:C:T
Past tobacco smoking	rs3811038	TTL		T>C	2:112482606 (GRCh38), 2:113240183 (GRCh37)	NC_000002.12:112482605:T:C
Past tobacco smoking	rs3827592		SNV	G>A	4:147026998 (GRCh38), 4:147948150 (GRCh37)	NC_000004.12:147026997:G:A
Past tobacco smoking	rs3857914		SNV	T>A,C	8:92171837 (GRCh38), 8:93184065 (GRCh37)	NC_000008.11:92171836:T:A,NC_000008.11:92171836:T:C
Past tobacco smoking	rs3935790		SNV	G>A	1:208552113 (GRCh38), 1:208725458 (GRCh37)	NC_000001.11:208552112:G:A
Past tobacco smoking	rs4044321	TENM2	SNV	A>C,G,T	5:167562508 (GRCh38), 5:166989513 (GRCh37)	NC_000005.10:167562507:A:C,NC_000005.10:167562507:A:G,NC_000005.10:167562507:A:T
Past tobacco smoking	rs4708899	LOC105378076	SNV	A>C,G	6:157330082 (GRCh38), 6:157751114 (GRCh37)	NC_000006.12:157330081:A:C,NC_000006.12:157330081:A:G
Past tobacco smoking	rs540356	NTM	SNV	C>A	11:132333922 (GRCh38), 11:132203816 (GRCh37)	NC_000011.10:132333921:C:A
Past tobacco smoking	rs56081685		SNV	T>C,G	13:58880006 (GRCh38), 13:59454140 (GRCh37)	NC_000013.11:58880005:T:C,NC_000013.11:58880005:T:G
Past tobacco smoking	rs58400863	LINC02497	SNV	G>A	4:31182862 (GRCh38), 4:31184484 (GRCh37)	NC_000004.12:31182861:G:A
Past tobacco smoking	rs6141314	NOL4L	SNV	G>A,C	20:32505711 (GRCh38), 20:31093514 (GRCh37)	NC_000020.11:32505710:G:A,NC_000020.11:32505710:G:C
Past tobacco smoking	rs6464024		SNV	C>T	7:1648733 (GRCh38), 7:1688369 (GRCh37)	NC_000007.14:1648732:C:T
Past tobacco smoking	rs6828849	GALNTL6	SNV	A>T	4:172155972 (GRCh38), 4:173077123 (GRCh37)	NC_000004.12:172155971:A:T
Past tobacco smoking	rs71491831		SNV	G>A	11:124735887 (GRCh38), 11:124605783 (GRCh37)	NC_000011.10:124735886:G:A
Past tobacco smoking	rs7216173	LOC124904030	SNV	A>C,G,T	17:53814044 (GRCh38), 17:51891405 (GRCh37)	NC_000017.11:53814043:A:C,NC_000017.11:53814043:A:G,NC_000017.11:53814043:A:T
Past tobacco smoking	rs7333559	CLYBL ， CLYBL-AS3	SNV	G>A	13:99894196 (GRCh38), 13:100546450 (GRCh37)	NC_000013.11:99894195:G:A
Past tobacco smoking	rs7582445		SNV	A>C,T	2:60268739 (GRCh38), 2:60495874 (GRCh37)	NC_000002.12:60268738:A:C,NC_000002.12:60268738:A:T
Past tobacco smoking	rs7600005	LOC105374591	SNV	G>A	2:47984916 (GRCh38), 2:48212055 (GRCh37)	NC_000002.12:47984915:G:A
Past tobacco smoking	rs7609050		SNV	A>C,T	2:155165350 (GRCh38), 2:156021862 (GRCh37)	NC_000002.12:155165349:A:C,NC_000002.12:155165349:A:T
Past tobacco smoking	rs762995	TCF20	SNV	A>G,T	22:42276118 (GRCh38), 22:42672124 (GRCh37)	NC_000022.11:42276117:A:G,NC_000022.11:42276117:A:T
Past tobacco smoking	rs77068442		SNV	A>G	1:158875526 (GRCh38), 1:158845316 (GRCh37)	NC_000001.11:158875525:A:G
Past tobacco smoking	rs77304846	UGT2A1，UGT2A2	SNV	T>C	4:69629635 (GRCh38), 4:70495353 (GRCh37)	NC_000004.12:69629634:T:C
Past tobacco smoking	rs7733542		SNV	A>C,G,T	5:107074963 (GRCh38), 5:106410664 (GRCh37)	NC_000005.10:107074962:A:C,NC_000005.10:107074962:A:G,NC_000005.10:107074962:A:T
Past tobacco smoking	rs77878475	LOC107984893	SNV	T>A	16:17964691 (GRCh38), 16:18058548 (GRCh37)	NC_000016.10:17964690:T:A
Past tobacco smoking	rs7901348	ARID5B	SNV	T>G	10:61919522 (GRCh38), 10:63679281 (GRCh37)	NC_000010.11:61919521:T:G
Past tobacco smoking	rs8034783	SEMA6D	SNV	C>G,T	15:47471529 (GRCh38), 15:47763726 (GRCh37)	NC_000015.10:47471528:C:G,NC_000015.10:47471528:C:T
Past tobacco smoking	rs8071295	CA10	SNV	C>A,T	17:52054634 (GRCh38), 17:50131994 (GRCh37)	NC_000017.11:52054633:C:A,NC_000017.11:52054633:C:T
Past tobacco smoking	rs885011	SDK1，LOC124901577	SNV	T>A,C	7:3445146 (GRCh38), 7:3484778 (GRCh37)	NC_000007.14:3445145:T:A,NC_000007.14:3445145:T:C
Past tobacco smoking	rs911773	TACC2	SNV	A>C,T	10:122205465 (GRCh38), 10:123964980 (GRCh37)	NC_000010.11:122205464:A:C,NC_000010.11:122205464:A:T
Past tobacco smoking	rs9299331	-	SNV	T>A,C	9:99384633 (GRCh38), 9:102146915 (GRCh37)	NC_000009.12:99384632:T:A,NC_000009.12:99384632:T:C
Past tobacco smoking	rs9375371	-	SNV	G>A,T	6:98303804 (GRCh38), 6:98751680 (GRCh37)	NC_000006.12:98303803:G:A,NC_000006.12:98303803:G:T
Past tobacco smoking	rs9423279	CPXM2	SNV	C>G	10:123920903 (GRCh38), 10:125680419 (GRCh37)	NC_000010.11:123920902:C:G
Past tobacco smoking	rs9542750	DACH1	SNV	T>C	13:71819588 (GRCh38), 13:72393720 (GRCh37)	NC_000013.11:71819587:T:C
Past tobacco smoking	rs963354	-	SNV	C>A,G	3:157675981 (GRCh38), 3:157393770 (GRCh37)	NC_000003.12:157675980:C:A,NC_000003.12:157675980:C:G
smoking/smokers in household	rs10765003	-	SNV	T>C,G	10:130915216 (GRCh38), 10:132713479 (GRCh37)	NC_000010.11:130915215:T:C,NC_000010.11:130915215:T:G
smoking/smokers in household	rs112250420	NARS2	SNV	T>A	11:78564066 (GRCh38), 11:78275112 (GRCh37)	NC_000011.10:78564065:T:A
smoking/smokers in household	rs11914502	-	SNV	T>A,C,G	3:115278537 (GRCh38), 3:114997384 (GRCh37)	NC_000003.12:115278536:T:A,NC_000003.12:115278536:T:C,NC_000003.12:115278536:T:G
smoking/smokers in household	rs143459797	KCNQ2	SNV	A>G,T	20:63421860 (GRCh38), 20:62053213 (GRCh37)	NC_000020.11:63421859:A:G,NC_000020.11:63421859:A:T
smoking/smokers in household	rs17770881	-	SNV	T>C,G	2:118264359 (GRCh38), 2:119021935 (GRCh37)	NC_000002.12:118264358:T:C,NC_000002.12:118264358:T:G
smoking/smokers in household	rs2236270	GSS	SNV	G>T	20:34935352 (GRCh38), 20:33523155 (GRCh37)	NC_000020.11:34935351:G:T
smoking/smokers in household	rs2495030	-	SNV	T>A,C,G	1:13663796 (GRCh38), 1:13990291 (GRCh37)	NC_000001.11:13663795:T:A,NC_000001.11:13663795:T:C,NC_000001.11:13663795:T:G
smoking/smokers in household	rs29746	PDZD2	SNV	T>A,C,G	5:31656991 (GRCh38), 5:31657098 (GRCh37)	NC_000005.10:31656990:T:A,NC_000005.10:31656990:T:C,NC_000005.10:31656990:T:G
smoking/smokers in household	rs317029	-	SNV	G>A,C,T	4:35423730 (GRCh38), 4:35425352 (GRCh37)	NC_000004.12:35423729:G:A,NC_000004.12:35423729:G:C,NC_000004.12:35423729:G:T
smoking/smokers in household	rs58790794	-	SNV	A>G	15:77893665 (GRCh38), 15:78186007 (GRCh37)	NC_000015.10:77893664:A:G
smoking/smokers in household	rs60429130	TTC21A	SNV	A>G	3:39114083 (GRCh38), 3:39155574 (GRCh37)	NC_000003.12:39114082:A:G
smoking/smokers in household	rs62409640	-	SNV	C>A,T	4:45138312 (GRCh38), 4:45140329 (GRCh37)	NC_000004.12:45138311:C:A,NC_000004.12:45138311:C:T
smoking/smokers in household	rs68110799	-	SNV	G>A,C	2:60718420 (GRCh38), 2:60945555 (GRCh37)	NC_000002.12:60718419:G:A,NC_000002.12:60718419:G:C
smoking/smokers in household	rs7127595	SBF2, LOC101928008	SNV	A>C,G,T	11:9882575 (GRCh38), 11:9904122 (GRCh37)	NC_000011.10:9882574:A:C,NC_000011.10:9882574:A:G,NC_000011.10:9882574:A:T
smoking/smokers in household	rs73724776	-	SNV	A>G	6:18010537 (GRCh38), 6:18010768 (GRCh37)	NC_000006.12:18010536:A:G
smoking/smokers in household	rs76811145	-	SNV	T>C	4:62700527 (GRCh38), 4:63566245 (GRCh37)	NC_000004.12:62700526:T:C
smoking/smokers in household	rs7875609	-	SNV	T>C,G	9:136169153 (GRCh38), 9:139060999 (GRCh37)	NC_000009.12:136169152:T:C,NC_000009.12:136169152:T:G
smoking/smokers in household	rs8142893	EFCAB6-AS1	SNV	T>A	22:43515286 (GRCh38), 22:43911166 (GRCh37)	2KB_upstream_variant,upstream_transcript_variant
smoking/smokers in household	rs9311834	PTPRG	SNV	C>A,G,T	3:62045175 (GRCh38), 3:62030849 (GRCh37)	NC_000003.12:62045174:C:A,NC_000003.12:62045174:C:G,NC_000003.12:62045174:C:T
smoking/smokers in household	rs9964681	EPB41L3	SNV	T>C	18:5471712 (GRCh38), 18:5471711 (GRCh37)	NC_000018.10:5471711:T:C

## Sheet: Table S4
Table S4. The results of pleiotropy test, Cochrane’s Q and MR-PRESSO
Exposure	P for pleiotropya	Cochrane’s Q	P for Cochrane’s Q	LDSC rg	MR-PRESSO (Raw)			MR-PRESSO (Outlier-corrected)
					OR	95% Cl	P	OR	95% Cl	P
Obesity
Waist circumference	0.7252	18.5	0.5539	-0.018	0.801	0.697-0.921	0.0047	NA	NA	NA
Body fat percentage	0.1429	356.1	0.548	0.175	1.124	1.012-1.248	0.029	NA	NA	NA
Arm fat percentage (left)	0.1808	174.3	0.6468	0.178	1.207	1.017-1.432	0.0326	NA	NA	NA
Trunk fat percentage	0.5877	384.1	0.0772	0.138	1.083	0.985-1.19	0.102	NA	NA	NA
Leg fat percentage (left)	0.6988	237.3	0.1762	-0.278	1.234	1.055-1.443	0.0092	NA	NA	NA
Smoking factors
past tobacco smoking	0.4151	47	0.8702	-0.216	0.9245	0.781-1.094	0.3656	NA	NA	NA
smoking/smokers in household	0.7375	16.8	0.5351	0.537	5.154	1.158-22.934	0.0444	NA	NA	NA
smoking initiation	0.5975	172.1	0.3573	0.381	1.142	1.039-1.256	0.0068	NA	NA	NA
Reproductive traits
Age at menarche	0.0481	40.3	0.5453	0.037	1.039	0.983-1.099	0.1793	NA	NA	NA
Age at first birth	0.636	129.1	0.2483	-0.715	0.92	0.883-0.958	＜0.001	1.01	0.86-1.18	0.885
Age first had sexual intercourse	0.2418	305.1	0.4869	-0.656	0.731	0.655-0.817	＜0.001	NA	NA	NA
a P-values for pleiotropy were derived from MR-Egger test and P-value<0.05 indicates a possible pleiotropic effect.
b P-values for distortion were derived from MR-PRESSO test and P-value<0.05 indicates a difference between estimates before and after outlier removal.

## Sheet: Table S5
Table S5. Mendelian randomization results of weighted median and MR-Egger methods
Exposure	Weighted median				MR-Egger
	OR	95%LCL	95%UCL	P	OR	95%LCL	95%UCL	P	Pheterogeneity	Ppleiotropy
leg fat percentage (left)	1.156	0.904	1.48	0.2483	2.356	0.625	4.455	0.0876	0.6302	0.1808
arm fat percentage (left)	1.225	0.95	1.58	0.1169	1.098	0.833	0.999	0.7579	0.1867	0.6988
trunk fat percentage	1.17	1.018	1.345	0.0269	0.984	1.454	3.465	0.9247	0.081	0.5877
waist circumference	0.813	0.645	1.027	0.0821	0.703	0.17	20.731	0.33	0.6085	0.7252
body fat percentage	1.136	0.953	1.355	0.1558	0.865	0.697	1.359	0.4235	0.4852	0.1289
smoking initiation	7.713	0.833	71.435	0.072	1.264	0.27	47.906	0.2412	0.372	0.5975
past tobacco smoking	0.881982	0.67265	1.15646	0.363633	1.3977	0.511723	3.81762	0.516255	0.870157	0.415108
smoking/smokers in household	7.713	0.833	71.435	0.072	12.688	0.807	36.053	0.3706	0.5938	0.7375
Age first had sexual intercourse	0.783	0.663	0.924	0.0037	0.945	0.342	2.701	0.8046	0.4809	0.2418
Age at menarche	1.07	0.986	1.161	0.1038	1.216	0.711	1.225	0.0093	0.4102	0.0481
Age at first birth	0.961	0.898	1.028	0.248	0.89	2.24	8.256	0.1859	0.264	0.636
